# Supplementary material for: Comparative Xylose Metabolism among the Ascomycetes C. albicans, S. stipitis and S. cerevisiae
Source: PLoS One. 2013 Nov 13;8(11):e80733. doi: 10.1371/journal.pone.0080733 (PMC3827475; doi:10.1371/journal.pone.0080733)
Supplement: Figure S2 — Microarray data. The transcription profiles for S. cerevisiae and C. albicans, when shifted to xylose from a glucose starter culture, were determined with two-color cDNA probe hybridizations. The tables show the average signal ratio (xylose/glucose, or no-sugar/glucose) of the replicates with the corresponding P-value for each ORF present on the microarrays. The complete data with the experimental details is available at NCBI under GEO accession number GSE50476. (XLS) [file pone.0080733.s002.xls]

## Sheet: S.cerevisiae
S.cerevisiae microarray data
	S (no sugar) vs SD	S (no sugar) vs SD	SX (xylose) vs SD	SX (xylose) vs SD
ORF	Signal ratio	P-value	Signal ratio	P-value	Annotation	Description
YMR107W	70.307	0.00634	62.4862	0.000781218
YIL057C	63.958	0.00711052	51.1004	0.000344899
YCR010C	66.924	0.00371941	50.1169	0.00127779	SPG2
YAL054C	65.8226	0.0077277	48.2906	0.00144386	ACS1	inducible acetyl-coenzyme A synthetase
YMR175W	14.9732	0.0132856	32.5577	0.00196584	SIP18	Salt-Induced Protein of 18 kDa
YLR327C	42.6322	0.00596324	29.012	0.000671347
YFL014W	25.18	0.0131488	27.7094	0.00185657	HSP12	12 kDa heat shock protein
YOR374W	22.6185	0.0144592	27.4097	0.00238621	ALD4	mitochondrial aldehyde dehydrogenase
YHR096C	35.8561	9.37272e-05	23.6824	0.000317097	HXT5	hexose transporter
YIL136W	32.9922	0.0165698	23.4343	0.00272501	OM45	45-kDa mitochondrial outer membrane protein
YMR174C	7.78339	2.16671e-05	23.1775	9.11978e-05	PAI3	Cytoplasmic inhibitor of proteinase Pep4p
YDR070C	21.2917	1.09353e-06	18.434	0.00173019
YPL223C	8.67724	0.00630477	17.7139	0.00254558	GRE1	hydrophilic polypeptide with no known homology
YOR388C	8.92243	0.0554042	17.2109	0.00834405	FDH1	similar to formate dehydrogenases
YIL160C	13.4727	0.0287163	16.2624	0.00281251	POT1	peroxisomal 3-oxoacyl CoA thiolase
YBR072W	3.91459	9.8804e-05	15.7079	0.0026364	HSP26	heat shock protein 26
YGR236C	33.9452	0.0506843	15.4004	0.00405847	SPG1	stationary phase gene
YOR285W	16.7258	0.00510594	14.9588	0.00144912
YBR050C	24.1137	0.00655046	14.0113	0.000259812	REG2	putative Glc7 regulatory subunit
YDR384C	12.5007	0.0443634	13.5472	0.00434665
YGR243W	26.9424	0.00537861	13.4352	0.00265305
YML128C	10.7922	7.5774e-06	13.4329	0.0023889	MSC1
YGR008C	16.0637	0.0180929	12.9389	0.00416264	STF2	ATPase stabilizing factor
YPR149W	14.9376	0.0301443	12.835	0.000534527	NCE102	Involved in secretion of proteins that lack classical secretory signal sequences
YEL060C	21.165	0.00684819	12.3954	0.00155429	PRB1	vacuolar protease B
YMR191W	20.8359	0.00726862	12.1066	0.00641806
YHR051W	11.0014	0.0282064	11.8613	3.3236e-06	COX6	subunit VI of cytochrome c oxidase
YHR137W	17.0023	0.0445779	11.3718	0.0295871	ARO9	aromatic amino acid aminotransferase II
YBR230C	10.0384	0.051413	10.3308	0.00845426
YGR043C	9.91533	0.00589925	9.86774	0.0128014
YPL004C	12.4973	0.00908667	9.79375	0.00402325
YIL012W	9.9328	0.0897238	9.73839	0.0212625
YLR284C	20.4933	0.000855573	8.95958	0.00651264	ECI1	Peroxisomal d3,d2-Enoyl-CoA Isomerase
YMR176W	3.45063	0.00764834	8.54	0.00112944	ECM5	(putative) involved in cell wall biogenesis
YNL202W	15.2916	0.00251595	8.43053	0.00836639	SPS19	peroxisomal 2,4-dienoyl-CoA reductase
YER065C	19.0969	0.0140302	8.35103	0.00847269	ICL1	isocitrate lyase
YDL204W	3.27842	0.133025	7.93174	0.0175162
YFL012W-A	5.99143	0.00306862	7.88103	0.00609652
YPL276W	4.78385	0.007387	7.85778	0.00352217
YNL203C	6.843	0.0631782	7.5857	0.031355
YDR178W	7.98541	0.0116413	7.57331	0.00147461	SDH4	succinate dehydrogenase membrane anchor subunit
YPR001W	10.7274	0.0633463	7.35071	0.0312687	CIT3	Mitochondrial isoform of citrate synthase
YGR205W	6.68626	0.00875493	7.23947	0.00238735
YBR026C	6.20764	0.115512	7.03443	0.0482527	MRF1'	Nuclear protein that binds to T-rich strand of core consensus sequence of autonomously replicating sequence
YKL142W	7.61208	0.062048	6.70431	0.00932431	MRP8	mitochondrial ribosomal protein
YOR100C	19.5825	0.0173732	6.69234	0.0145355	CRC1	mitochondrial carnitine transport protein
YPR150W	15.5839	0.00924158	6.55234	0.0205643
YKL217W	8.74521	0.0850744	6.49422	0.018139	JEN1	carboxylic acid transporter protein homolog
YNL013C	3.95654	2.96768e-06	6.26713	2.5979e-07
YDL085W	9.54427	0.0563346	6.11801	0.0477167
YGR056W	5.11019	9.15214e-05	5.67411	3.0457e-06	RSC1	Member of RSC complex
YCL064C	6.69625	0.011341	5.53592	0.00259588	CHA1	catabolic serine (threonine) dehydratase
YMR303C	4.63084	0.000128132	5.51399	0.0035834	ADH2	alcohol dehydrogenase II
YGR086C	9.21684	0.0422953	5.39409	0.00127276
YBL075C	3.46597	0.16566	5.39186	0.00948721	SSA3	heat-inducible cytosolic member of the 70 kDa heat shock protein family
YPL135W	10.7782	0.00093554	5.36942	0.00171043	ISU1	Iron-sulfur cluster nifU-like protein
YER024W	7.34687	0.0913212	5.32244	0.00951053
YCR005C	12.0041	0.0190353	5.21416	0.00971688	CIT2	non-mitochondrial citrate synthase
YDR059C	5.43583	0.00257087	5.19513	0.00020308	UBC5	ubiquitin-conjugating enzyme
YMR118C	3.48795	0.0531394	5.19157	0.0144545
YJR148W	6.37377	9.79391e-07	5.15393	0.00138426	BAT2	Branched-Chain Amino Acid Transaminase
YNL036W	5.20197	0.107798	5.13691	0.0221264	NCE103	involved in non-classical protein export pathway
YKL187C	3.92761	0.0892816	5.07316	0.0109187
YNR001C	8.18738	0.00471758	4.98803	0.00415259	CIT1	citrate synthase. Nuclear encoded mitochondrial protein.
YBR067C	2.73689	0.00114145	4.95744	0.00530469	TIP1	cell wall mannoprotein
YDR256C	7.3991	0.134849	4.95507	0.00188922	CTA1	catalase A
YJR104C	6.3854	0.00201975	4.93511	0.000668768	SOD1	Cu, Zn superoxide dismutase
YOL083W	3.80578	8.51429e-05	4.9344	0.0230208
YEL012W	7.85191	0.00239621	4.73305	0.00224148	UBC8	ubiquitin-conjugating enzyme\; ubiquitin-protein ligase
YHR055C	3.56958	0.0682056	4.71557	0.00164185	CUP1-2	copper-binding metallothionein
YNL022C	3.99373	0.0984105	4.62717	0.000715596
YAR040C	4.43994	0.184462	4.62622	0.0428167
YAR035W	8.17667	0.0845479	4.62473	0.0352377	YAT1	Outer carnitine acetyltransferase, mitochondrial
YNL200C	4.82542	0.000400637	4.5706	0.0183699
YAL044C	2.57696	0.0761847	4.56803	0.00684713	GCV3	H-protein subunit of the glycine cleavage system
YNL194C	15.9761	0.0113932	4.51381	0.0297738
YMR011W	3.08293	0.0575812	4.49428	0.0079201	HXT2	high affinity hexose transporter-2
YDR343C	1.26499	0.296631	4.46133	0.00129548	HXT6	Hexose transporter
YGR271W	4.81893	0.0974613	4.43288	0.0222568
YHR053C	3.88484	0.108907	4.40708	0.0107216	CUP1-1	copper-binding metallothionein
YIL124W	2.67877	0.155003	4.39878	0.0705325	AYR1	1-Acyl dihydroxyacetone phosphate reductase
YGL080W	8.27808	0.0114333	4.36996	0.00317083
YNL015W	4.95519	0.00882164	4.35412	0.00246804	PBI2	Proteinase inhibitor that inhibits protease Prb1p (yscB)
YKL150W	4.60651	0.0557896	4.32898	0.0175397	MCR1	NADH-cytochrome b5 reductase
YAL060W	4.78056	0.144705	4.32662	0.00941345
YBL015W	5.47095	0.0389012	4.31294	0.0178981	ACH1	acetyl CoA hydrolase
YKR076W	2.94904	0.0837368	4.29034	0.0434328	ECM4	(putative) involved in cell wall biogenesis
YOR261C	3.48281	0.0022213	4.23909	0.000223611	RPN8	Subunit of the regulatory particle of the proteasome
YBR296C	3.69632	0.0882339	4.17683	0.029104	PHO89	Probable Na+\/Pi symporter
YOR180C	4.27064	0.0872576	4.14302	0.00113875	DCI1	Peroxisomal delta(3,5)-delta(2,4)-dienoyl-CoA isomerase
YPL113C	7.18335	0.00687683	4.10761	0.00686025
YFL021W	3.25464	0.029752	4.05532	0.0332499	GAT1	transcriptional activator with GATA-1-type Zn finger DNA-binding motif
YMR110C	4.22075	0.0142666	4.02406	0.0178026
YNL208W	4.25913	0.0287209	3.98152	0.00496902
YKL065C	5.57268	0.0398198	3.92029	0.00955906	YET1	Yeast endoplasmic reticulum 25 kDa transmembrane protein
YFL059W	2.13676	0.245923	3.91986	0.042589	SNZ3	member of the stationary phase-induced gene family
YLR377C	9.34621	0.0101348	3.86788	0.03215	FBP1	fructose-1,6-bisphosphatase
YBL064C	3.69492	0.0619468	3.83986	0.00507093		similar to thiol-specific antioxidant enzymes such as rehydrin\/peroxiredoxin
YCL040W	2.89539	0.109402	3.81935	0.0151961	GLK1	Glucokinase
YOL147C	4.16547	0.0532298	3.77847	0.0204196	PEX11	Peroxisomal membrane protein
YBR212W	5.98359	0.0289872	3.77774	0.00801295	NGR1	negative growth regulatory protein
YNR002C	4.51575	0.0483916	3.76958	0.0123644	FUN34	Putative transmembrane protein
YHR008C	2.63269	0.0045744	3.7564	0.0344402	SOD2	Manganese-containing superoxide dismutase
YDR380W	4.46379	0.000371342	3.73667	0.0048217	ARO10
YLR142W	16.185	0.0217938	3.73391	0.0349819	PUT1	proline oxidase
YBR126C	4.46147	0.0237647	3.7294	0.0191444	TPS1	56 kD synthase subunit of trehalose-6-phosphate synthase\/phosphatase complex
YJR085C	4.66675	0.028582	3.72267	0.0116018
YNL270C	2.36035	0.00328078	3.70303	0.00729376	ALP1	Basic amino acid permease
YMR206W	4.77036	0.00205282	3.70093	0.0176015
YHR098C	3.4487	0.0944301	3.63264	0.0167435	SFB3	binds to Sed5p and Sec23p by distinct domains
YPL057C	9.53889	0.00481083	3.61828	5.83743e-06	SUR1	integral membrane protein, exhibits homology to YBR161w, Hoc1p, and Och1p
YMR096W	3.02064	0.0202781	3.61804	0.0036848	SNZ1	encodes highly conserved 35 kDa protein that shows increased expression after entry into stationary phase
YDR160W	5.20944	0.00501008	3.55031	0.00671516	SSY1	regulator of transporters
YOR142W	4.47927	0.0276855	3.52733	0.0157688	LSC1	Succinate-CoA Ligase (ADP-Forming)
YDL223C	2.61782	0.0778261	3.51436	0.0436653
YLR164W	3.33335	0.0184446	3.50579	0.0204091
YMR090W	3.3759	0.0377692	3.50442	0.00232859
YNL195C	4.58256	0.000107298	3.50372	0.030037
YKR097W	13.2298	1.00231e-05	3.4744	0.00884216	PCK1	phosphoenolpyruvate carboxylkinase
YNR005C	2.23938	0.00186335	3.46613	0.0203827
YHR138C	5.62749	0.0709226	3.45925	0.00401898
YJR008W	4.29706	0.015747	3.38827	0.00114177
YIL059C	3.86812	0.251459	3.35876	0.0729018
YLR178C	2.45024	0.0974947	3.29929	0.0129215	TFS1	(putative) lipid binding protein\; supressor of a cdc25 mutation
YKR075C	2.53319	0.00382526	3.28647	0.0206008
YOR031W	2.86438	0.00234266	3.26661	0.00838647	CRS5	Metallothionein-like protein
YIR038C	2.26518	0.0331628	3.25922	0.0226077	GTT1	Glutathione transferase
YBR139W	5.42606	0.0327048	3.25304	0.0025205		Probable serine-type carboxypeptidase (EC 3.4.16.1)
YJL048C	3.16663	0.0540454	3.23088	0.0283762
YBR286W	3.82824	0.0988079	3.20693	0.0123653	APE3	Aminopeptidase yscIII
YBL067C	2.36118	0.168154	3.20465	0.00406773	UBP13	ubiquitin carboxyl-terminal hydrolase
YIL155C	2.72778	0.0694062	3.19272	0.049285	GUT2	glycerol-3-phosphate dehydrogenase, mitochondrial
YPL265W	3.11395	0.060035	3.18993	3.86332e-05	DIP5	dicarboxylic amino acid permease
YBR145W	2.67581	0.235758	3.16615	0.0311184	ADH5	alcohol dehydrogenase isoenzyme V
YKL093W	4.48135	0.00110724	3.11869	0.0103279	MBR1	MBR1 protein precursor
YMR148W	2.57677	0.0184336	3.08966	0.0474952
YOL126C	8.23457	0.0115254	3.06294	0.0487447	MDH2	cytosolic malate dehydrogenase
YMR315W	1.47663	0.0351035	3.04588	0.00765876
YLR356W	2.1439	0.0442607	3.0199	0.00898345
YNL134C	4.68896	2.65719e-08	2.9651	0.00709584
YML131W	2.99956	0.168958	2.96413	0.00424573
YOR120W	3.29078	0.0179629	2.91583	0.0283722	GCY1	Similar to mammalian aldo\/keto reductases
YDR231C	3.37109	0.023751	2.90297	0.0266919	COX20	protein required for maturation and assembly of cytochrome oxidase subunit II
YJR073C	2.60395	0.0651132	2.89072	0.046686	OPI3	Methylene-fatty-acyl-phospholipid synthase (unsaturated phospholipid N-methyltransferase)
YMR103C	4.65141	0.0771797	2.86861	0.137648
YOR052C	3.45262	0.0305554	2.86484	0.0526937
YMR057C	1.42011	0.00265102	2.85497	0.0100392
YBL041W	2.81828	0.0261265	2.84704	0.0106967	PRE7	proteasome subunit
YDL222C	4.22491	0.000835149	2.84652	0.0216247
YBR132C	3.27529	0.0651448	2.79594	0.00385776	AGP2	Amino acid permease
YNL009W	3.32137	0.00818439	2.78967	0.0239411	IDP3	peroxisomal NADP-dependent isocitrate dehydrogenase
YKR009C	2.87109	0.0767817	2.77949	0.0158069	FOX2	peroxisomal multifunctional beta-oxidation protein
YMR311C	4.03997	0.00814721	2.76869	0.00243864	GLC8	Regulates activity of protein phosphatase 1, Glc7p, which is involved in proper chromosome segregation
YJR044C	2.52123	3.86359e-05	2.7153	0.0913412
YPL275W	1.78348	0.0184546	2.71135	0.0300335
YDR342C	0.966644	0.39878	2.67229	0.000218892	HXT7	Hexose transporter
YHR087W	2.54919	0.0237572	2.66897	0.0198522
YPL156C	6.56661	0.0544114	2.66619	0.0243999	PRM4	pheromone-regulated membrane protein
YCR032W	2.20293	0.0246587	2.64137	0.0439262	BPH1	(putative) acetic acid export pump
YGL205W	2.56184	0.0108249	2.64109	0.00104221	POX1	fatty-acyl coenzyme A oxidase
YFR053C	1.02703	0.882121	2.64016	0.0403793	HXK1	Hexokinase I (PI) (also called Hexokinase A)
YJR095W	5.19147	0.00850343	2.63695	0.00533963	SFC1	mitochondrial succinate-fumarate transport protein
YIR037W	2.22802	0.0222138	2.63542	0.00106611	HYR1	putative glutathione-peroxidase
YJR066W	2.02266	0.07545	2.61778	1.49732e-05	TOR1	phosphatidylinositol kinase homolog
YNL173C	3.1373	0.000176881	2.61207	0.0249001	MDG1	Involved in G-protein mediated signal transduction
YGR209C	2.95724	0.0442669	2.59864	0.0464186	TRX2	thioredoxin
YPR172W	2.84739	0.00215953	2.59606	0.0414379
YER021W	2.9225	0.0740479	2.59503	0.0428376	RPN3	component of the regulatory module of the 26S proteasome, homologous to human p58 subunit
YHR219W	3.41058	9.58819e-05	2.58285	0.000633778
YMR097C	2.13222	0.0945173	2.56857	0.0113574
YCL033C	1.91983	0.307496	2.55655	0.0179343		Transcription regulator
YML004C	2.71862	0.0260459	2.54969	0.0116731	GLO1	lactoylglutathione lyase (glyoxalase I)
YCR004C	2.31907	0.314516	2.53543	0.0457404	YCP4	FMN-binding protein
YGR231C	2.54459	0.0154277	2.52299	0.0620117	PHB2	mitochondrial protein, prohibitin homolog\; homolog of mammalian BAP37 and S. cerevisiae Phb1p
YLL023C	3.12505	0.000521258	2.50923	0.0403819
YMR238W	4.03556	0.0258645	2.50162	0.00176435	DFG5	involved in pseudohyphal growth
YOL086C	2.71559	0.000669214	2.49075	0.000528705	ADH1	Alcohol dehydrogenase
YPR098C	3.24567	0.0113164	2.48314	0.00992611
YDR223W	1.59928	0.00194667	2.48293	0.0378695
YMR304W	2.61579	0.129524	2.46915	0.00734154	UBP15	putative deubiquitinating enzyme
YHR097C	4.00325	0.0594697	2.46579	0.0532013
YDR019C	1.8917	0.00513251	2.46446	0.0291654	GCV1	glycine cleavage T protein (T subunit of glycine decarboxylase complex
YDR111C	3.79698	0.0258506	2.45737	0.0368921
YHR214W	1.14915	0.537143	2.45379	0.10426
YML048W	3.27804	0.0432184	2.45326	0.00013841	GSF2	involved in glucose repression
YKL117W	2.4296	0.206914	2.44564	0.0824513	SBA1	Hsp90 (Ninety) Associated Co-chaperone
YGL096W	2.11249	0.0703961	2.43803	0.0420584	TOS8
YDR196C	2.4039	0.116786	2.4264	0.000489133
YDL174C	4.07443	0.002735	2.42631	0.0221172	DLD1	mitochondrial enzyme D-lactate ferricytochrome c oxidoreductase
YDL125C	3.14982	0.0201776	2.42506	0.00933357	HNT1	similarity to protein kinase C inhibitor-I
YDR032C	2.45229	0.0533599	2.41971	0.0188021	PST2	Protoplasts-SecreTed protein\; the gene product was detected among the proteins secreted by regenerating protoplasts
YPL229W	1.44082	0.014179	2.40056	0.023908
YMR083W	2.0327	0.139468	2.39818	0.0555516	ADH3	alcohol dehydrogenase isoenzyme III
YDL169C	3.66249	0.0259458	2.3932	0.00200949	UGX2
YBL001C	1.66318	0.279415	2.38652	0.00243388	ECM15	involved in cell wall biogenesis
YBR149W	2.81025	0.0828247	2.37723	0.0324551	ARA1	D-arabinose dehydrogenase
YHR001W-A	2.0081	0.269712	2.37609	0.00217891	QCR10	8.5 kDa subunit of the ubiqunol-cytochrome c oxidoreductase complex
YER067W	2.30904	0.0251865	2.37179	0.0019771
YOR027W	1.78425	0.00350869	2.36934	0.0365899	STI1	Heat shock protein also induced by canavanine and entry into stationary phase
YGR248W	2.07441	0.142852	2.36926	0.0245466	SOL4	similar to SOL3
YNL160W	0.92603	0.170379	2.35299	0.0690288	YGP1	YGP1 encodes gp37, a glycoprotein synthesized in response to nutrient limitation which is homologous to the sporulation-specific SPS100 gene
YER004W	1.31732	0.00901589	2.3271	0.0274289
YGR244C	1.96366	0.157582	2.30575	0.0241859	LSC2	Succinate-CoA Ligase (ADP-Forming)
YGR253C	1.74995	0.0903308	2.29501	0.0354356	PUP2	Proteasome subunit
YLR312C	3.95595	0.0305284	2.28759	0.0421867
YPL186C	1.96736	0.029635	2.28613	0.0334661
YJL163C	2.1199	0.0255617	2.28356	8.38077e-05
YHR106W	1.62438	0.20017	2.28295	0.0377211	TRR2	mitochondrial thioredoxin reductase
YJL185C	4.03884	7.1737e-05	2.27253	0.00912629
YIL033C	2.56094	0.0184902	2.27191	0.011641	BCY1	regulatory subunit of cAMP-dependent protein kinase
YDL172C	3.56349	0.013707	2.27169	6.07345e-05
YGR130C	1.57736	0.0531382	2.25786	0.00503151
YPL147W	2.89619	0.00213984	2.2553	0.00726557	PXA1	ABC family long-chain fatty acid transporter
YPL203W	3.40008	0.0311096	2.25346	0.0852344	TPK2	cAMP-dependent protein kinase catalytic subunit
YGR127W	2.96076	0.0298211	2.22823	0.0311421
YPR023C	2.96451	0.0832188	2.22044	0.0229867	EAF3	stable component of the NuA4 complex
YMR181C	2.36269	0.114717	2.21804	0.0348863
YGR010W	2.22387	0.0159773	2.21595	1.51085e-06
YKL085W	1.80926	0.0701129	2.21047	0.0614748	MDH1	mitochondrial malate dehydrogenase
YFL058W	2.63082	0.102724	2.20843	0.0210975	THI5	a thiamine regulated pyrimidine precursor biosynthesis enzyme
YLR222C	2.57887	0.0082418	2.2072	0.161908
YAL043C	3.12071	0.107415	2.20492	0.168264	PTA1	pre-tRNA processing
YDR246W	1.50475	0.0326591	2.1955	0.0028663	TRS23	TRAPP subunit of 23 kDa
YKR039W	3.52584	6.3037e-05	2.19261	0.013916	GAP1	general amino acid permease
YDR327W	2.3441	0.0239316	2.18869	0.00530395
YKR066C	1.755	0.0275241	2.18207	1.37078e-05	CCP1	Cytochrome-c peroxidase
YKL141W	1.43151	0.245641	2.17397	0.00255042	SDH3	succinate dehydrogenase cytochrome b
YHR057C	1.53933	0.00736957	2.17097	0.000390072	CYP2	Peptidylprolyl isomerase (cyclophilin) ER or secreted
YFL029C	2.0146	5.78559e-05	2.16581	0.0456334	CAK1	Cyclin-dependent kinase-activating kinase
YML042W	1.66877	0.196705	2.16323	0.00350594	CAT2	Carnitine O-acetyltransferase, peroxisomal and mitochondrial
YBR056W	3.37759	0.120036	2.16263	0.00647882		Homolog to glucan-1,3--glucosidase (EC 3.2.1.5\; S. cerevisiae) 2
YFR004W	2.07725	0.0103749	2.15887	0.000425752	RPN11	Similar to S. pombe PAD1 gene product
YMR072W	1.92211	0.123089	2.1582	0.0501872	ABF2	HMG-1 homolog, mitochondrial
YER121W	2.46871	0.188971	2.15059	0.0406346
YER081W	1.7939	0.000183906	2.15049	0.0738273	SER3	3-phosphoglycerate dehydrogenase
YOR220W	4.78786	0.0021986	2.14998	0.0121105
YMR114C	2.23243	0.0755476	2.14614	0.0407191
YPR002W	3.5475	0.0309101	2.14257	0.0129469	PDH1	prpD homolog (ie the propionate operon of many prokaryotes and specifically, the gene called prpD in that operon) This gene may be regarded as *real* in yeast by two criteria: it has close homologs (some known to be essential for propionate utilization) in numerous prokaryotes (several of these homologs are called prpD), and it is transcribed in yeast.
YER079W	3.23631	0.00661777	2.14175	0.0659907
YDL200C	2.38007	0.303542	2.13558	0.0548723	MGT1	6-O-methylguanine-DNA methylase
YOR257W	3.4353	1.0071e-05	2.13387	0.00289506	CDC31	Required for spindle pole body duplication and mitosis in meiosis II\; calcium-binding protein component of spindle pole bodies, localizes to half-bridges and interacts with KAR1
YOR230W	1.34307	0.238992	2.11988	0.0246909	WTM1	Transcriptional modulator
YIR031C	2.63636	0.000130243	2.11611	0.00288613	DAL7	Malate synthase 2
YDR328C	2.12666	0.00367598	2.11309	0.00624418	SKP1	Skp1p encodes Cbf3d, a 29 Kd kinetochore protein subunit of CBF3 -- a complex which binds to the CDE III element of centromeres. Skp1p is also a subunit of the SculCdc4 (also termed SCFCdc4p) complex. SculCdc4 transfers ubiquitin to phosphorylated Sic1p and substrate recognition is thought to involve Skp1p.
YLR329W	2.15927	0.110821	2.10969	0.0356735	REC102	23 kDa protein containing a putative leucine zipper\; meiosis specific recombination protein\; mRNA is induced early in sporulation
YDL147W	1.48563	0.0998705	2.08762	0.056309	RPN5	Subunit of the regulatory particle of the proteasome
YJL088W	3.28258	0.130803	2.08575	0.0908844	ARG3	Ornithine carbamoyltransferase
YDL215C	1.81828	0.0179741	2.07989	0.00807943	GDH2	NAD-dependent glutamate dehydrogenase
YHR092C	0.596921	0.0330444	2.07767	0.0812541	HXT4	High-affinity glucose transporter
YML090W	1.97669	0.141258	2.06933	0.00383066
YPL230W	4.38511	0.0888053	2.06769	0.0693253	USV1	Up in StarVation
YHR199C	3.37871	0.0471338	2.06214	0.052622
YOL048C	2.98852	0.00542911	2.06057	0.0224636
YJR038C	2.09122	0.000268344	2.05953	0.0112143
YBL005W-A	2.69649	0.158803	2.05861	0.0814339		TyA gag protein. Gag processing produces capsid proteins.
YPL123C	2.37345	0.136288	2.05646	0.00490633	RNY1	Ribonuclease from the T2 family of ribonucleases
YBR226C	1.88625	0.115473	2.05433	0.0241707
YMR105C	2.10494	0.0372538	2.05389	0.0446198	PGM2	Phosphoglucomutase
YMR262W	2.65702	0.000573883	2.04283	0.180242
YNL047C	1.11977	0.51919	2.04223	0.10084
YNR035C	2.23552	0.020968	2.04117	0.0130486	ARC35	Arp Complex Subunit
YKL091C	2.83085	0.0877465	2.03709	0.11104
YMR251W-A	2.71092	0.0862698	2.03391	3.10372e-05	HOR7	hyperosmolarity-responsive gene
YDR099W	2.1686	0.0121106	2.0254	0.00905843	BMH2	member of conserved eukaryotic 14-3-3 gene family
YDR329C	3.06321	0.000114549	2.02441	0.055837	PEX3	48-kDa peroxisomal integral membrane protein
YMR153C-A	5.21129	0.0730221	2.02292	0.00495047
YBR116C	1.33762	0.231912	2.02197	0.0247627
YLR220W	1.77007	0.020409	2.02165	0.0194977	CCC1	Possible transmembrane Ca2+ transporter
YNL125C	1.97216	0.0155635	2.01902	0.0352146	ESBP6	Putative monocarboxylate permease
YLR398C	1.671	0.0811458	2.01765	0.110977	SKI2	antiviral protein, putative helicase
YJL001W	1.24492	0.0425311	2.01529	0.00831001	PRE3	Subunit of 20S proteasome
YPL201C	2.02687	0.00411436	2.00736	0.0110484
YNR049C	2.68564	0.0156464	2.00522	0.0829335	MSO1	small hydrophilic protein, enriched in microsomal membrane fraction, interacts with Sec1p
YLL026W	1.75725	0.098621	1.99653	0.13775	HSP104	104 kDa heat shock protein
YJR028W	2.6914	0.0822809	1.98967	0.0709883
YDR118W	1.87791	0.0888742	1.98335	1.99559e-05	APC4	subunit of the anaphase promoting complex (APC)
YBR112C	2.08843	0.00808126	1.97964	0.00686862	CYC8	Transcription regulatory protein
YIL087C	1.7579	0.0225939	1.97508	0.00819263
YBR084W	1.51565	0.394913	1.9651	0.0959891	MIS1	mitochondrial C1-tetrahydroflate synthase
YGR161C	5.07166	0.0572457	1.96363	0.0666395
YAR009C	1.93686	0.461152	1.9622	0.117083
YDR277C	1.58108	0.20813	1.94236	0.0787054	MTH1	Protein is 61\% identical to Msn3p
YMR030W	2.28146	0.0661447	1.94221	0.0259233
YGR053C	2.31851	0.00550489	1.93787	0.0284134
YBR148W	2.12794	0.0538603	1.93692	0.13221	YSW1	Spore-specific protein
YLR348C	2.08418	0.0197556	1.93499	0.0981506	DIC1	mitochondrial dicarboxylate transport protein
YJR026W	2.6662	0.0850254	1.93339	0.00213962
YOL038W	1.70885	0.00993561	1.93044	0.0649267	PRE6	alpha-type of subunit of 20S proteasome
YFL011W	1.25867	0.0192904	1.93005	0.0150327	HXT10	high-affinity hexose transporter
YGR141W	2.62932	0.0110732	1.92924	0.10202
YOL151W	1.232	0.451285	1.92801	0.0025883	GRE2	putative reductase
YDR368W	1.46065	0.000838097	1.92699	0.0304033	YPR1	similar to aldo-keto reductase
YOR062C	1.35684	0.0940156	1.92371	0.101208
YDR204W	2.89381	0.100805	1.91541	0.0641359	COQ4	involved in ubiquinone biosynthesis
YJL023C	2.21082	0.187486	1.91391	0.0782714	PET130	Nuclear gene encoding mitochondrial protein
YBR295W	1.30007	0.150976	1.90938	0.0103838	PCA1	Putative P-type Cu(2+)-transporting ATPase
YEL011W	1.89685	0.11453	1.90806	0.0876154	GLC3	1,4-glucan-6-(1,4-glucano)-transferase
YMR041C	1.93348	0.106144	1.90728	0.101689
YGR061C	1.84717	0.00535821	1.90488	0.00501178	ADE6	5'-phosphoribosylformyl glycinamidine synthetase
YOR348C	2.02193	0.00461151	1.89983	0.0112923	PUT4	putative proline-specific permease
YBR280C	1.98729	0.336414	1.8984	0.116492
YOL101C	1.20907	0.052461	1.89666	7.17232e-05
YMR136W	1.89395	0.109757	1.89334	0.053329	GAT2
YDR194C	0.890132	0.0503191	1.89062	0.0184635	MSS116	Mitochondrial DEAD box RNA helicase
YMR051C	2.76463	0.0482569	1.88807	0.0228674		TyA Gag protein. Gag processing produces capsid proteins.
YDR171W	2.63706	0.123882	1.88752	0.128903	HSP42	heat shock protein similar to HSP26, involved in cytoskeleton assembly
YFL061W	1.4349	0.03796	1.88199	0.0195709
YMR169C	1.93535	0.0221967	1.88199	0.0188482	ALD3	aldehyde dehydrogenase
YGL156W	1.63721	0.0104248	1.87803	0.0085439	AMS1	vacuolar alpha mannosidase
YER035W	2.76619	0.000644001	1.87755	0.0742559	EDC2	Functions with Edc1p to stimulate mRNA decapping
YCL049C	1.78104	0.00584655	1.87666	0.00349686
YGL056C	2.09935	5.7598e-05	1.87407	0.0600178	SDS23	similar to S. pombe sds23
YMR270C	1.53452	0.0144947	1.87295	0.0159358	RRN9	Upstream activation factor subunit
YNL156C	3.68235	0.000154295	1.87182	0.0701135
YGL002W	2.67154	0.0233877	1.86926	0.096158	ERP6	p24 protein involved in membrane trafficking
YDR077W	2.58534	0.102825	1.85823	0.0100718	SED1	putative cell surface glycoprotein
YDR018C	2.04362	1.31156e-05	1.84978	0.000444266
YGR146C	2.86633	0.106133	1.84918	0.104365
YIR043C	2.35098	0.0847045	1.84413	0.0148051
YCR073W-A	1.53695	0.144404	1.84021	0.0925144	SOL2	shows similarity to glucose-6-phosphate dehydrogenase non-catalytic domains\; homologous to Sol1p and Sol3p
YBR077C	1.7687	0.234339	1.83939	0.0165488
YER012W	1.85304	0.145015	1.83925	0.118285	PRE1	22.6 kDa proteasome subunit
YJL045W	1.31741	0.000482943	1.83558	0.0287908
YAR043C	1.29295	0.535739	1.83504	0.1804
YGL053W	1.41237	0.10738	1.83447	0.0297094	PRM8	pheromone-regulated membrane protein
YFL066C	1.39526	0.0985766	1.83387	0.00213123
YBL033C	2.16284	0.00563928	1.82962	0.0188088	RIB1	GTP cyclohydrolase II
YDR357C	1.77843	0.0498334	1.82834	0.000741835
YOR383C	1.50344	0.148695	1.82581	0.0248095
YCR079W	1.89926	0.11811	1.82349	0.135876
YPL054W	3.63699	0.0842508	1.82126	0.0344284	LEE1
YMR056C	1.90682	0.0590441	1.82052	0.0829982	AAC1	mitochondrial ADP\/ATP translocator
YAL061W	1.884	0.0947447	1.81998	0.309233
YOR019W	1.57972	0.126745	1.818	0.017703
YDR079W	1.75102	0.205861	1.81638	0.00601257	PET100	cytochrome c oxidase-specific assembly factor
YOR215C	2.05404	0.00609417	1.8157	0.0153484
YGL055W	0.628463	0.259349	1.81527	0.0184965	OLE1	delta-9-fatty acid desaturase
YDR513W	1.9524	0.000276649	1.81141	0.0453201	TTR1	Glutaredoxin (thioltransferase) (glutathione reductase)
YGL121C	1.51901	0.0837281	1.80683	0.0430437
YMR081C	1.64655	0.191025	1.80576	0.0274477	ISF1	involved in mitochondrial RNA splicing
YLR080W	1.25008	0.187054	1.80172	0.000154608
YNL100W	2.78956	0.0376771	1.79881	0.0495852
YBR051W	2.80013	0.0727214	1.79843	0.0084772
YKR058W	1.59937	0.150002	1.79769	0.066696	GLG1	glycogen synthesis initiator
YLR375W	3.07356	0.00402241	1.79727	0.0361859	STP3	Involved in pre-tRNA splicing
YAR071W	1.29207	0.00298553	1.79715	0.0546161	PHO11	Acid phosphatase, secreted
YGR046W	1.86948	0.0548089	1.79184	0.0145959
YJL172W	2.66912	0.132746	1.78918	0.00293572	CPS1	carboxypeptidase yscS
YML045W	1.86211	0.151522	1.78858	0.00219346		TyB Gag-Pol protein. Gag processing produces capsid proteins. Pol is cleaved to produce protease, reverse transcriptase and integrase activities.
YKR014C	1.5259	0.189001	1.78838	0.00381446	YPT52	probable purine nucleotide-binding protein
YOR391C	2.05342	0.00960143	1.78498	0.030452
YNL305C	2.35491	0.0464157	1.78497	0.043162
YKR004C	0.923216	0.0822348	1.78297	0.139612	ECM9	(putative) involved in cell wall biogenesis
YLR174W	1.97717	0.0578765	1.78246	0.0907493	IDP2	Cytosolic form of NADP-dependent isocitrate dehydrogenase
YAR023C	1.66172	0.156431	1.78148	0.262453		membrane protein
YDL188C	1.3805	0.345812	1.78116	0.0534431	PPH22	serine-threonine protein phosphatase 2A
YFL050C	1.52944	0.000437387	1.77766	0.0535609	ALR2	(putative) ion transporter
YIL055C	1.71956	0.150612	1.77366	0.133472
YOR138C	2.335	0.011373	1.76329	0.115593
YDL078C	2.06357	0.161231	1.74671	0.0161592	MDH3	malate dehydrogenase
YLL041C	1.69754	0.00773623	1.7463	0.00230068	SDH2	Succinate dehydrogenase (ubiquinone) iron-sulfur protein subunit
YPL159C	2.35967	0.0136497	1.74629	0.0121095
YDR179W-A	3.71731	0.039005	1.74438	0.0937505
YMR173W-A	1.40811	0.0768141	1.74366	0.000418246
YGL037C	2.21002	0.192251	1.74359	0.177212	PNC1	pyrazinamidase and nicotinamidase
YIL002C	1.8616	0.0600124	1.74319	0.0243005	INP51	phosphatidylinositol 4,5-bisphosphate 5-phosphatase
YFL044C	1.68974	0.00624378	1.74161	0.0801744
YJR099W	1.48208	0.158055	1.74129	0.0182263	YUH1	ubiquitin hydrolase
YMR297W	1.82898	0.152202	1.73359	0.056257	PRC1	carboxypeptidase Y (proteinase C)
YCR025C	1.49872	0.189049	1.73318	0.253872
YNL093W	1.91555	0.00133327	1.73267	0.00706647	YPT53	GTP-binding protein of the rab family
YCL025C	0.781123	0.641076	1.73203	0.0829372	AGP1	Amino acid permease
YDR125C	1.71202	0.0751987	1.72971	0.0386798	ECM18	(putative) involved in cell wall biogenesis
YAL063C	1.36438	0.0577968	1.72616	0.342727	FLO9	putative Flo1p homolog
YFL007W	1.60393	0.00424757	1.72582	0.00119099	BLM3	Involved in protecting the cell against bleomycin damage
YNL055C	2.30066	4.08932e-06	1.72439	0.033589	POR1	Outer mitochondrial membrane porin (voltage-dependent anion channel, or VDAC)
YIL088C	1.76056	0.00390973	1.72435	0.0207719		similar to amino acid transport proteins
YGR088W	1.73238	0.0652105	1.72426	0.0026416	CTT1	cytoplasmic catalase T
YDR153C	0.978057	0.886764	1.72309	0.173741
YER054C	1.74912	0.0425413	1.72233	0.0369823	GIP2	(putative) regulator of Glc7, a PP1 family protein phosphatase
YFL054C	1.27272	0.0827475	1.72164	0.0783279
YOR007C	1.69155	0.0725345	1.71922	0.197165	SGT2	small glutamine-rich tetratricopeptide repeat containing protein
YKL067W	1.93673	0.00121024	1.71803	0.0690798	YNK1	Nucleoside diphosphate kinase
YFL030W	1.34153	0.126612	1.71547	0.00322629
YBL101W-A	2.55881	0.0948401	1.71458	0.0503971		TyA gag protein. Gag processing produces capsid proteins.
YOR148C	2.11824	0.0314396	1.71176	0.049059	SPP2	spliceosome-associated protein
YKL186C	2.2162	0.0624115	1.70043	0.00446139	MTR2	mRNA transport regulator
YNL322C	2.51434	0.0115883	1.69969	0.028248	KRE1	putatively involved in side-chain addition to beta-1,6-glucan
YNL155W	1.14765	0.286006	1.6964	0.243876
YFL-TYA	2.70008	0.153233	1.69602	0.142665
YBL051C	1.61023	0.0524161	1.69535	0.0525886
YDR272W	2.20137	0.022128	1.69529	0.0405748	GLO2	Cytoplasmic glyoxylase-II
YGR198W	1.16454	0.134125	1.69419	0.0115127
YBR039W	1.62825	0.0292682	1.69282	0.15032	ATP3	gamma subunit of mitochondrial ATP synthase
YER094C	1.01844	0.922888	1.69266	0.0168457	PUP3	20S proteasome subunit beta3_sc
YKL026C	1.72147	0.0236104	1.69238	0.00334087	GPX1	Glutathione peroxidase paralogue
YEL033W	1.96028	0.0160449	1.69213	0.00802411
YKR093W	1.24595	0.0197489	1.69191	0.119478	PTR2	Peptide transporter
YBL045C	1.62345	0.056007	1.69078	0.0163035	COR1	44 kDa core protein of yeast coenzyme QH2 cytochrome c reductase
YMR046C	2.21334	0.155364	1.68711	0.00388412		TyA Gag protein. Gag processing produces capsid proteins.
YPL154C	1.82462	0.0281655	1.68575	0.0230879	PEP4	vacuolar proteinase A
YDR041W	1.9667	0.0578519	1.68568	0.0149928	RSM10	protein of the small subunit of the mitochondrial ribosome
YBR071W	1.77666	0.0358987	1.68504	0.00728552
YNL333W	0.980387	0.790866	1.68332	0.167244	SNZ2	member of the stationary phase-induced gene family
YLR362W	1.3855	0.0465203	1.68239	0.00396545	STE11	Ser\/Thr protein kinase\; MEKK homolog
YGR174C	1.21164	0.315585	1.68191	0.0547272	CBP4	ubiquinol--cytochrome-c reductase assembly factor
YHR195W	1.56161	0.22853	1.68	0.23373	NVJ1	Vac8p binding protein\; nucleus-vacuole junction
YOR250C	1.38659	0.104438	1.67922	0.0613697	CLP1	cleavage\/polyadenylation factor IA subunit
YOR173W	1.86528	0.168218	1.67677	0.00834486
YIL090W	1.54648	0.128576	1.67416	0.0514865
YGL005C	1.11391	0.380406	1.67303	0.0425419
YLR270W	2.17328	0.0161707	1.67072	0.00992138
YOR084W	1.43612	0.0225902	1.66746	0.00622337
YCR083W	1.32923	0.159438	1.66396	0.0152294	TRX3	mitochondrial thioredoxin
YPR155C	1.97348	0.0960257	1.65896	0.0398722	NCA2	Regulates expression of mitochondrial ATP synthase
YMR119W-A	1.64154	0.0366335	1.65662	0.0167063
YMR152W	1.44922	0.146542	1.65427	0.171274	YIM1	Mitochondrial inner membrane protease, similar to E. coli leader peptidase
YCR036W	1.41293	0.486483	1.65416	0.240872	RBK1	ribokinase
YIL077C	2.01594	0.0214236	1.65345	0.0347714
YGL260W	1.6507	0.292928	1.65121	0.0376916
YOL071W	1.82484	0.00195856	1.65105	0.0817154
YHR065C	0.861165	0.309837	1.64804	0.0222345	RRP3	RRP3 is a DEAD box gene homologous to eIF-4a which encodes an RNA-dependent ATPase possessing helicase activity which is not specific for RNA
YPL127C	2.41274	0.0505555	1.6459	0.221449	HHO1	histone H1
YLR162W	1.61664	0.0576103	1.64513	0.193283
YER030W	2.01652	0.00218502	1.64359	0.00961728
YNL149C	1.82732	0.00156573	1.64303	0.0472176
YML041C	1.96561	0.0223863	1.64161	4.64099e-06
YMR189W	1.34271	0.0522148	1.63976	0.0906966	GCV2	Glycine decarboxylase complex (P-subunit), glycine synthase (P-subunit), Glycine cleavage system (P-subunit)
YNL241C	2.50734	0.208383	1.63845	0.000304566	ZWF1	Glucose-6-phosphate dehydrogenase
YOL129W	1.72717	0.0502679	1.63508	0.175832
YBR168W	1.53518	0.00356616	1.63436	0.00514794
YMR040W	3.20362	0.0321856	1.6336	0.0136973
YDR133C	1.28673	0.389807	1.63326	0.0577732
YOL155C	0.918983	0.663435	1.63119	0.0205889
YDR244W	1.28938	0.0799268	1.63001	0.026321	PEX5	69-kDa protein containing tetratricopeptide repeat (TPR)
YAR007C	1.06293	0.867487	1.62794	0.22272	RFA1	69 kDa subunit of the heterotrimeric RPA (RF-A) single-stranded DNA binding protein, binds URS1 and CAR1
YBR214W	2.36963	0.0980905	1.62579	0.110244	SDS24	nuclear protein similar to pombe sds23
YML132W	1.7826	0.0838041	1.62411	0.00295467	COS3	similar to subtelomerically-encoded proteins
YLR108C	1.54904	0.000190443	1.6235	0.140438
YLR109W	1.11926	0.269339	1.62122	0.0627473	AHP1	alkyl hydroperoxide reductase
YDR162C	1.6755	0.00945175	1.621	0.0281135	NBP2	interacts with Nap1, which is involved in histone assembly
YNL157W	3.19034	0.027378	1.61838	0.076069
YIL080W	1.00198	0.976991	1.61732	0.065346		Ty3B Gag-Pol protein. Gag processing produces capsid proteins. Pol is cleaved to produce protease, reverse transcriptase and integrase activities.
YLL019C	2.07871	0.0314634	1.61678	0.0138781	KNS1	protein kinase homolog
YDL206W	1.1188	0.384237	1.61484	0.118736
YLR025W	1.75096	0.190037	1.61453	0.0332462	SNF7	involved in glucose derepression
YOL065C	1.52053	0.0295393	1.61036	0.0227706	INP54	inositol polyphosphate 5-phosphatase
YDL023C	1.01032	0.969695	1.60903	0.21776
YML040W	1.22345	0.39878	1.60865	0.0164827		TyA Gag protein. Gag processing produces capsid proteins.
YHR140W	1.70848	0.0164901	1.60862	0.103669
YJL220W	1.74463	0.210876	1.60843	0.0199911
YFL-TYB	2.03413	0.040521	1.60821	0.000164014
YGL048C	1.46894	0.00542365	1.60695	0.0810429	RPT6	ATPase
YCR042C	0.991192	0.983723	1.60623	0.40751	TSM1	TATA binding protein-associated factor (TAF)
YAR027W	1.0579	0.939819	1.60295	0.392898		membrane protein
YDR073W	2.3355	0.00736863	1.60188	0.193712	SNF11	component of SWI\/SNF global transcription activator complex
YBR108W	1.59633	0.194579	1.60165	0.341045		Probable transcription factor
YHR100C	1.72246	0.00159597	1.59956	0.000425235
YLR251W	1.32715	0.29348	1.59385	0.0599644
YKL096W	0.909282	0.315626	1.59228	0.0696953	CWP1	cell wall mannoprotein
YPL193W	1.99671	0.00245265	1.59175	0.055812	RSA1	RiboSome Assembly
YLR306W	1.41769	0.226228	1.59052	0.0250143	UBC12	Ubiquitin-conjugating enzyme
YAL015C	1.83238	0.000872475	1.58764	0.0413495	NTG1	DNA glycosylase
YGL051W	1.08598	0.527084	1.58665	0.0762184
YAL028W	1.03927	0.149223	1.58588	0.365306
YAR010C	1.83001	0.226519	1.58286	0.308472		TY1B
YPL271W	1.46193	0.160074	1.58028	0.0694673	ATP15	nuclear gene for ATP synthase epsilon subunit
YBL043W	1.43117	0.0213297	1.57988	0.1283	ECM13	(putative) involved in cell wall biogenesis
YGL146C	1.41745	0.0285809	1.57921	7.12131e-05
YJR087W	1.4219	0.00752067	1.57774	0.0141824
YJL020C	2.06273	0.0827174	1.57687	0.164788
YMR322C	1.14543	0.456879	1.57475	0.00968608
YIL070C	0.997585	0.964293	1.57192	0.148046	MAM33	Mitochondrial protein involved in respiration
YGR167W	1.68995	0.213472	1.57106	0.168261	CLC1	Clathrin light chain
YBR001C	1.79387	0.150968	1.56915	0.0727912	NTH2	Neutral trehalase, highly homologous to Nth1p
YLR350W	4.2003	0.0407211	1.56895	0.00494776
YLR190W	2.39644	0.104961	1.56719	0.204428
YPL222W	1.73475	0.0326595	1.56714	0.082837
YPL114W	1.88182	0.000100532	1.56578	0.00644227
YBR046C	1.5924	0.130962	1.56557	0.057096	ZTA1	Homolog to quinone oxidoreductase (E. coli)
YKL145W	1.0013	0.973331	1.55978	0.0432	RPT1	putative ATPase, 26S protease subunit component
YML039W	1.93797	0.088135	1.55875	0.00052899		TyB Gag-Pol protein. Gag processing produces capsid proteins. Pol is cleaved to produce protease, reverse transcriptase and integrase activities.
YNL116W	1.79344	0.056554	1.55698	0.0352093
YOR054C	2.05942	0.022212	1.55628	0.00748975
YPL196W	1.7743	0.145224	1.55558	0.110297
YPR151C	2.21654	0.127626	1.5531	0.0145142
YPL107W	1.70832	0.00674014	1.55257	0.0597909
YML133C	1.00612	0.972204	1.54829	0.0208758
YJL146W	0.881394	0.125138	1.54734	0.0625943	IDS2	(putative) involved in meiosis
YKL107W	0.991392	0.985137	1.54721	0.141128
YBL049W	2.37564	0.197459	1.54691	0.211107
YAL062W	2.05455	0.0210422	1.54688	0.0633343	GDH3	NADP-linked glutamate dehydrogenase
YOR245C	1.94066	0.120502	1.54534	0.192592
YNL029C	1.34006	0.0274066	1.54491	0.127954	KTR5	Putative mannosyltransferase
YDL133C-A	1.38238	0.0683717	1.54182	0.286581	RPL41B	Ribosomal protein L41B (YL41) (L47B)
YIR016W	1.74037	0.0431155	1.54175	0.0206965
YDR225W	1.3265	0.159568	1.54132	0.00955222	HTA1	Histone H2A (HTA1 and HTA2 code for nearly identical proteins)
YLR345W	1.73479	0.0152134	1.54027	0.0548242
YMR276W	1.39639	0.0122095	1.53955	0.00281086	DSK2	ubiquitin-like protein
YCL042W	1.1618	0.261651	1.53839	0.0497487
YFR047C	1.47647	0.0371526	1.53638	0.09602
YJR021C	1.02569	0.879034	1.53456	0.0581286	REC107	ds break formation complex subunit
YBL058W	1.89502	0.00369177	1.53282	0.0226872	SHP1	putative regulatory subunit for Glc7p, a phosphatase required for glucose repression
YBL050W	1.92419	0.0729255	1.53224	0.066238	SEC17	peripheral membrane protein required for vesicular transport between ER and Golgi
YER010C	1.49764	0.0222963	1.53203	0.119588
YCR091W	1.47443	0.2173	1.53131	0.0818098	KIN82	Putative serine\/threonine protein kinase most similar to cyclic nucleotide-dependent protein kinase subfamily and the protein kinase C subfamily
YGR176W	1.20526	0.306779	1.53097	0.135857
YKL219W	1.43184	0.0390879	1.52975	0.0171203	COS9	Protein with similarity to subtelomerically-encoded proteins such as Cos5p, Ybr302p, Cos3p, Cos1p, Cos4p, Cos8p, Cos6p, Cos9p
YGR026W	1.13017	0.12431	1.52937	0.0326506
YOR128C	1.26207	0.472637	1.52707	0.159207	ADE2	phosphoribosylamino-imidazole-carboxylase
YPL183C	1.70123	0.181166	1.52571	0.0937182
YDR168W	1.70003	0.00949274	1.52338	0.0984676	CDC37	(putative) chaperone, involved in spindle pole body duplication and passage through START
YOR317W	2.58389	0.0215327	1.52065	0.0363122	FAA1	long chain fatty acyl:CoA synthetase
YOR263C	2.46678	0.0711969	1.51937	0.116509
YDR155C	1.0844	0.344564	1.519	0.0373709	CPH1	cyclophilin peptidyl-prolyl cis-trans isomerase
YIL083C	1.3305	0.21412	1.51877	0.048135
YHL020C	1.98777	0.000250284	1.51785	0.00656736	OPI1	negative regulator of phospholipid biosynthesis
YPR193C	1.24549	0.00304568	1.5176	0.0415001	HPA2	Histone acetyltransferase
YDL046W	1.68081	0.190738	1.51701	0.0858006
YNL331C	1.04212	0.797647	1.51696	0.175389	AAD14	Hypothetical aryl-alcohol dehydrogenase
YNR036C	1.39553	0.191552	1.51683	0.0831097
YHR184W	1.6666	0.00628175	1.51648	0.000107663	SSP1	involved in meiosis, nuclear division and spore formation
YBR241C	1.10879	0.17503	1.51572	0.199213		Probable sugar transport protein
YNL098C	1.93571	0.0353242	1.5155	0.0532109	RAS2	Small, GTP-binding protein
YDL097C	1.44538	0.0337737	1.51475	0.200044	RPN6	Subunit of the regulatory particle of the proteasome
YMR151W	1.27134	0.0339947	1.51443	0.0252671	YIM2
YPR075C	1.49948	0.0203134	1.51376	0.0153579	OPY2	imparts Far- phenotype
YDR383C	1.73636	0.219477	1.51296	0.207903
YNL237W	1.26762	0.26275	1.51218	0.0463652	YTP1	Similar to mitochondrial electron transport proteins.
YBL066C	1.05097	0.804417	1.51016	0.30939	SEF1	putative transcription factor
YCR038C	1.12482	0.697039	1.5097	0.466739	BUD5	GTP\/GDP exchange factor for Rsr1 protein
YPL171C	1.1243	0.662414	1.50929	0.0485857	OYE3	NAD(P)H dehydrogenase
YPL055C	2.51895	2.22601e-05	1.50907	0.019191
YPL061W	1.81109	0.0568019	1.50883	0.0648785	ALD6	Cytosolic Aldehyde Dehydrogenase
YAR037W	1.35588	0.0891931	1.5077	0.292206
YCL052C	1.99016	0.153747	1.50708	0.246147	PBN1	Protease B, nonderepressible form
YOL052C-A	1.19492	0.0410345	1.50579	0.000882386	DDR2	induced by DNA damage, heat shock, osmotic shock, and oxidative stress
YLR127C	0.874899	0.241512	1.50454	0.0118844	APC2	subunit of the anaphase promoting complex (APC)
YGR126W	0.893724	0.460794	1.50311	0.168811
YAL042C-A	1.07723	0.14802	1.50279	0.311219
YPL119C	1.2711	0.0212684	1.50231	0.0284112	DBP1	putative ATP-dependent RNA helicase\; Dead box protein
YJR065C	1.09888	0.442914	1.50168	0.0785219	ARP3	involved in the function of the actin cytoskeleton
YNL223W	1.25971	0.00780038	1.50078	0.0108762	AUT2	Anchor protein. Mediates attachment of autophagosomes to microtubules.
YOL153C	1.23527	0.373964	1.49999	0.0572924
YLR158C	2.21142	0.0178361	1.49939	0.0417774	ASP3-3	nitrogen catabolite-regulated cell-wall L-asparaginase II
YKR049C	1.67568	0.00940108	1.49853	0.00766757
YGL139W	1.06399	0.399808	1.49842	0.123695
YDL025C	1.84652	0.00681811	1.4972	0.128144
YDR078C	1.67183	0.179997	1.49679	0.0128466
YDR198C	0.997733	0.973006	1.49642	0.11808
YIL041W	1.58621	0.217856	1.49611	0.216696
YLR258W	1.50045	0.00119393	1.49434	0.0825509	GSY2	Glycogen synthase (UDP-gluocse--starch glucosyltransferase)
YDL160C	1.41932	0.294252	1.49319	0.141686	DHH1	(putative) DEAD box RNA helicase
YFL049W	1.31905	0.0648517	1.49268	0.0138236
YDR358W	1.82508	0.0630057	1.49263	0.101732	GGA1	Arf-binding protein
YKL183W	0.843543	0.111719	1.49218	0.110496
YOR129C	0.906361	0.0834848	1.49044	0.095838
YGR247W	1.6179	0.104368	1.48678	0.129321
YGR134W	1.35453	0.0316301	1.48617	0.000172991	CAF130	CCR4 associated factor 130 kDa
YKL148C	1.35927	0.0271368	1.48588	0.00914762	SDH1	flavoprotein subunit of succinate dehydrogenase
YML118W	2.53184	0.0154021	1.48474	0.160745	NGL3
YGR052W	1.25893	0.180799	1.48265	0.180495
YIL065C	1.63402	0.0010066	1.48233	0.186623	FIS1	mitochondrial fission
YDL065C	2.06871	0.249662	1.48154	0.268686	PEX19	40 kDa farnesylated protein associated with peroxisomes
YPR185W	0.97833	0.663951	1.48142	0.253375	APG13	Involved in autophagy
YNL327W	0.865217	0.184798	1.47987	0.140698	EGT2	Cell wall protein. Putatively involved in glucan metabolism
YPL092W	1.20681	0.161259	1.47977	0.219466	SSU1	major facilitator superfamily protein
YBR197C	1.09147	0.525856	1.47906	0.191985
YLR206W	1.16634	0.608947	1.47852	0.362582	ENT2	Ent2p
YKL097C	1.44973	0.00124267	1.4781	0.0090232
YOR289W	2.13896	0.00359914	1.47766	0.0373549
YHR054C	1.89154	0.00328835	1.47757	0.137506
YHR159W	1.50726	0.0915379	1.47684	0.00230077
YOR228C	1.24145	0.407274	1.47679	0.0634568
YMR027W	1.83827	0.00466335	1.47606	0.0391372	HRT2	High level expression reduced Ty3 Transposition
YAL042W	1.18467	0.0330816	1.47601	0.436483	ERV46	ER-Golgi transport vesicle protein
YKR016W	0.87968	0.325154	1.47535	0.211046
YJR113C	1.40064	0.181768	1.47433	0.0267634	RSM7	protein of the small subunit of the mitochondrial ribosome
YOR083W	0.911842	0.389917	1.47316	0.127082
YIL014W	1.49896	0.396065	1.47291	0.0362677	MNT3	alpha-1,3-mannosyltransferase
YKL124W	1.19906	0.030079	1.46954	0.00543877	SSH4	(putative) involved in ER functions
YCR102C	1.82336	0.0888429	1.46934	0.198206		Alcohol dehydrogenase
YJR019C	1.03204	0.858503	1.46905	0.0381845	TES1	peroxisomal acyl-CoA thioesterase
YGL007W	1.09748	0.0693759	1.46748	0.0249033
YOL037C	1.46938	0.00326223	1.46701	0.0186954
YHR160C	1.09347	0.405401	1.46674	0.0348775	PEX18	Peroxin Pex18p
YNL032W	0.876269	0.104163	1.4657	0.0250703	SIW14	Tyrosine phosphatase
YGR111W	1.2405	0.137582	1.46472	0.195258
YLR466W	0.918541	0.523661	1.46252	0.100507	YRF1-4	Y'-helicase protein 1
YCL039W	1.291	0.401744	1.46248	0.222371		regulatory protein
YDL027C	1.82461	0.00759734	1.4619	0.0151479
YGR197C	1.80718	0.00803876	1.46184	0.121024	SNG1	involved in nitrosoguanidine resistance
YPL078C	1.75636	0.230443	1.46093	0.00331832	ATP4	F(1)F(0)-ATPase complex delta subunit, mitochondrial
YBR170C	1.2039	0.391641	1.46057	0.180326	NPL4	Suppressor of SEC63 (S.cerevisiae), novel ER translocation component
YLR337C	1.59864	0.00536968	1.46046	0.000594532	VRP1	Proline-rich protein verprolin
YGL088W	1.24487	0.417067	1.45999	0.205789
YKR018C	1.038	0.776823	1.45983	0.0342044
YOL099C	1.61867	0.0201144	1.45812	0.0938013
YCL020W	1.9359	0.201137	1.4562	0.126813		GAG polyprotein
YOL109W	2.97531	0.0804416	1.45555	0.0476679	ZEO1	Overexpression causes resistance to Zeocin
YML006C	1.37755	0.142591	1.45535	0.014723	GIS4	CAAX box containing protein
YGR223C	1.32228	0.171424	1.45498	0.00800617
YDL159W	0.925399	0.310629	1.45485	0.163177	STE7	MEK homolog
YPR182W	1.60798	0.000486566	1.45443	0.0293947	SMX3	Sm or Sm-like snRNP protein
YLR081W	0.821402	0.161939	1.45424	0.0713229	GAL2	galactose permease
YOR259C	1.3131	0.0175754	1.45391	0.277842	RPT4	ATPase\; component of the 26S proteasome cap subunit
YLR267W	1.58395	0.031747	1.45385	0.00166455	BOP2	Bypass of PAM1
YGR274C	0.905232	0.498493	1.45351	0.215019	TAF145	TFIID 145 KDa subunit
YAL014C	1.09046	0.555285	1.45196	0.522444
YMR036C	2.46454	0.0215145	1.45139	0.0632268	MIH1	homolog of S. pombe cdc25
YOR362C	1.41062	0.00370611	1.45044	0.0396727	PRE10	proteasome component YC1 (protease yscE subunit 1)
YDR251W	1.81874	0.081797	1.4496	0.0748163	PAM1	multicopy suppressor of protein phosphatase 2A
YNL133C	1.89861	0.178915	1.4496	0.00584189	FYV6
YHR110W	1.02005	0.852858	1.44921	0.039125	ERP5	p24 protein involved in membrane trafficking
YAL011W	1.15998	0.638888	1.44787	0.231008		possible mitochondrial transit peptide
YOR134W	1.41315	0.0631875	1.44747	0.00867867	BAG7	GTPase activating protein (GAP)
YAL048C	1.29754	0.223474	1.44706	0.243214
YAL016W	1.64201	0.00125145	1.44665	0.315659	TPD3	protein phosphatase 2A regulatory subunit A
YKL100C	1.71041	0.0369352	1.4459	0.00403603
YOR229W	0.898715	0.452945	1.44477	0.196351	WTM2	Transcriptional modulator
YNL165W	1.23101	0.147973	1.44447	0.0712915
YOR023C	1.44995	0.020103	1.4435	0.0435764	AHC1	protein of the Ada histone acetyltransferase complex
YJL142C	1.90147	0.063049	1.44345	0.0377758
YOL150C	1.43591	0.177993	1.44138	0.00211356
YMR140W	1.26044	0.321217	1.44049	0.160655
YIR036C	1.35901	0.187922	1.43977	0.112935
YMR227C	0.943225	0.6872	1.43971	0.132107	TAF67	TFIID subunit
YIL161W	2.03353	0.0158553	1.43968	0.100748
YPR099C	1.61207	0.108569	1.43946	0.0770785
YBR290W	2.41115	0.183049	1.43941	0.258344	BSD2	copper transporter
YNL135C	0.890503	0.179961	1.43867	0.0128292	FPR1	peptidylprolyl cis-trans isomerase
YAL056W	1.4935	0.0682978	1.43801	0.150727	GPE2	G protein effector
YOL082W	1.36845	0.00996336	1.43717	0.0164226
YAR042W	1.25117	0.361589	1.43616	0.402296	SWH1	ankyrin repeat
YOR015W	1.84955	0.00351915	1.43549	0.237602
YJL089W	1.53058	0.0319087	1.43546	0.01363	SIP4	shows homology to DNA binding domain of Gal4p, has a leucine zipper motif and acidic region\; lexA-Sip4p activates transcription
YPL024W	1.39207	0.309227	1.43502	0.0183991	NCE4	involved in cell separation
YNL329C	0.958591	0.822548	1.43357	0.0815683	PEX6	Member of the AAA-protein family that includes NSFp and PEX1p
YNL179C	1.12306	0.0783961	1.43329	0.0616552
YHR206W	0.992044	0.922068	1.4326	0.0951811	SKN7	transcription factor involved in oxidative stress response
YFR014C	1.06983	0.721331	1.43251	0.0370173	CMK1	Calmodulin-dependent protein kinase
YOR132W	1.38908	0.00296414	1.43226	0.0362568	VPS17	involved in vacuolar protein targeting
YBL102W	1.18546	0.483983	1.43187	0.0454898	SFT2	similar to mammalian syntaxin 5
YLR129W	0.811984	0.0313357	1.43102	0.184269	DIP2	interacts with Dom3p
YJL036W	1.97716	0.0318494	1.42925	0.115567	SNX4	Sorting NeXin
YML038C	0.928067	0.453402	1.42902	0.0624514	YMD8	similar to vanadate resistance protein Gog5
YPL134C	1.40862	0.247779	1.4285	0.00137339	ODC1	mitochondrial 2-oxodicarboxylate transport protein
YJL150W	0.968842	0.461147	1.42702	0.0869447
YCR033W	1.66501	0.000282217	1.42632	0.0175213
YFL067W	1.4713	0.0768562	1.42614	0.0345162
YPL018W	1.20184	0.0600018	1.42606	0.100157	CTF19	kinetochore protein
YJL044C	1.12493	0.0248656	1.42596	0.000148084	GYP6	GTPase-activating protein for Ypt6
YOR183W	0.930366	0.312215	1.42391	0.222642	FYV12
YHR104W	1.22862	0.136571	1.42282	0.0329667	GRE3	a keto-aldose reductase
YIL107C	1.43308	0.0145911	1.42151	0.0628142	PFK26	6-Phosphofructose-2-kinase
YJL151C	2.63583	2.32963e-06	1.42112	0.0137347
YDR453C	1.29975	0.034275	1.42074	0.0220334
YGL161C	1.33476	0.170679	1.42052	0.0374874
YJR010C-A	0.968023	0.56519	1.42012	0.161575	SPC1	signal peptidase subunit
YLR346C	1.78813	0.00456279	1.41731	0.00396926
YKL050C	1.01156	0.931152	1.41646	0.125861
YIL061C	1.75427	0.450639	1.41626	0.26939	SNP1	U1snRNP 70K protein homolog
YDR534C	1.0656	0.781783	1.41464	0.197361
YGR067C	1.58572	0.0518318	1.41394	0.0160323
YHR214W-A	1.05818	0.473907	1.41376	0.0384851
YGR183C	1.92494	0.0065433	1.41373	0.182061	QCR9	7.3 kDa subunit 9 of the ubiquinol cytochrome c oxidoreductase complex
YNL024C	1.37933	0.125067	1.41364	0.138439
YLR058C	0.552542	0.0171164	1.41344	0.36632	SHM2	serine hydroxymethyltransferase
YML079W	0.942395	0.210294	1.41293	0.168573
YJR020W	1.19557	0.281063	1.41015	0.0578937
YMR277W	0.948562	0.527227	1.40823	0.150168	FCP1	TFIIF interacting component of CTD phosphatase
YDL112W	1.08296	0.634583	1.40757	0.131738	TRM3	tRNA (Gm18) ribose methylase
YBR218C	1.47947	0.222669	1.4072	0.291777	PYC2	pyruvate carboxylase
YGL208W	2.30707	0.000558086	1.40713	0.10688	SIP2	component of Snf1 protein complex involved in response to glucose starvation
YIL082W-A	0.934233	0.471798	1.40706	0.169481
YLR131C	0.912782	0.219605	1.40693	0.183068	ACE2	zinc finger transcription factor
YAL051W	0.781848	0.163151	1.40674	0.591267	OAF1	transcription factor
YDR405W	1.51099	0.000425558	1.40656	0.0316613	MRP20	263-amino acid mitochondrial ribosomal large subunit protein\; similar to L23 family of ribosomal proteins
YAL009W	1.85025	0.00322128	1.40652	0.193865	SPO7	sporulation protein
YJL042W	1.25307	0.105117	1.40619	0.00741351	MHP1	Putative microtubule-associated protein (MAP)
YPL165C	1.39408	0.00954349	1.40459	0.0765322
YKL171W	1.5537	0.0782081	1.40436	0.0297142		probable serine\/threonine-specific protein kinase (EC 2.7.1.-)
YOR008C	2.67177	0.00935545	1.40428	0.0655267	SLG1	involved in cell wall integrity and stress response
YLR181C	0.991234	0.959187	1.4041	0.0453181
YNL052W	1.45296	0.162717	1.40376	0.229429	COX5A	Cytochrome-c oxidase chain Va
YJL144W	1.37413	0.00297427	1.40321	0.0344314
YLR160C	2.34481	0.0953885	1.40189	0.122727	ASP3-4	nitrogen catabolite-regulated cell-wall L-asparaginase II
YNL281W	0.958011	0.266221	1.40158	0.150768	HCH1	high copy Hsp90 supressor
YOR162C	1.1783	0.522321	1.40111	0.125903	YRR1	transcription factor
YJL100W	0.968218	0.734339	1.4004	0.103397
YLR423C	1.53099	0.000483685	1.4	0.075599	APG17	involved in autophagy
YLR093C	1.75777	0.0257625	1.39959	0.000666164	NYV1	vacuolar v-SNARE
YOR190W	1.2635	0.0523554	1.39947	0.0709878	SPR1	sporulation-specific exo-1,3-beta-glucanase
YIL036W	0.9143	0.591292	1.39933	0.133829	CST6	omosome STability
YGR024C	1.10117	0.616177	1.39896	0.00300409
YER182W	1.42425	0.0201939	1.39884	0.0932785
YKL195W	0.974947	0.901838	1.3988	0.0372555
YPR006C	1.57105	0.182018	1.39841	0.110157	ICL2	Isocitrate lyase, may be nonfunctional
YAL034C-B	2.28746	0.0249377	1.39738	0.0739796
YNL072W	1.2464	0.301509	1.39727	0.221087	RNH35	RNase H(35), a 35 kDa ribonuclease H
YBR131W	1.49252	0.366698	1.39507	0.172159	CCZ1	involved in sporulation, caffeine, calcium, and zinc sensitivity
YFR050C	1.20643	0.393645	1.39476	0.140317	PRE4	proteasome subunit necessary for peptidyl glutamyl peptide hydrolyzing activity
YJL103C	1.20632	0.0808332	1.39246	0.0596636
YPL260W	1.76597	0.127196	1.39189	0.0318844
YDL248W	2.24039	0.188553	1.3916	0.198191	COS7	similar to other subtelomerically-encoded proteins
YOL047C	1.29743	0.169984	1.39138	0.00177964
YML089C	1.13746	0.464676	1.39092	0.0825903
YOL009C	0.992015	0.947581	1.3909	0.205331	MDM12	Mdm12p is a mitochondrial outer membrane protein. An Mdm12p homolog exists in S. Pombe which confers a dominant negative phenotype when expressed in S. cerevisiae
YML092C	1.0897	0.0728268	1.3908	0.00747788	PRE8	proteasome component Y7
YER037W	1.36399	0.172212	1.39027	0.0349286	PHM8
YGR128C	1.06776	0.0788498	1.3897	0.142548
YMR229C	0.898723	0.0439366	1.38915	0.160038	RRP5	Protein required for processing of pre-rRNA
YPL277C	1.38549	0.0927882	1.38913	0.00075405
YGR172C	0.853166	0.00286592	1.38882	0.196559	YIP1	Golgi integral membrane protein, interacts with Ypt proteins
YLR177W	1.05915	0.767337	1.3887	0.104379
YER159C	1.88023	0.0373429	1.38851	0.222103	BUR6	Transcriptional regulator which functions in modulating the activity of the general transcription machinery in vivo
YGL014W	1.25531	0.632738	1.38845	0.563967
YJL102W	0.898817	0.165265	1.38775	0.126914	MEF2	mitochondrial elongation factor G-like protein
YOL032W	1.56191	0.0397064	1.38769	0.123957
YBR090C	1.56263	0.186589	1.38713	0.0588996
YCR039C	1.40317	0.65972	1.38619	0.24089	MATALPHA2	Mating type protein alpha-2
YOR040W	1.19905	0.366479	1.38584	0.0313873	GLO4	Mitochondrial glyoxylase-II
YHR037W	1.39578	0.00105646	1.38476	0.0409142	PUT2	delta-1-pyrroline-5-carboxylate dehydrogenase
YMR275C	0.825318	0.0530026	1.3845	0.166951	BUL1	Rsp5p ubiquitin ligase binding protein
YHL032C	1.233	0.471854	1.38397	0.251633	GUT1	glyerol kinase (converts glycerol to glycerol-3-phosphate
YEL077C	0.916171	0.0836956	1.38275	0.112598
YDR294C	1.10776	0.326878	1.38266	0.0662719	DPL1	dihydrosphingosine phosphate lyase (also known as sphingosine phosphate lyase)
YLR224W	1.04711	0.664475	1.38233	0.129381
YDL108W	0.877019	0.00939855	1.38232	0.225481	KIN28	serine-threonine kinase, subunit of transcription factor TFIIK, a subcomplex of TFIIH
YHL024W	1.2069	0.0459928	1.38231	0.00438626	RIM4	RNA-binding protein of the RRM class (putative)
YNR042W	0.960335	0.487614	1.38046	0.197973
YAR033W	1.07776	0.570914	1.37943	0.0739775		membrane protein
YOL111C	2.16133	0.0695481	1.37929	0.244835
YMR256C	1.69433	0.123907	1.37926	0.0973249	COX7	subunit VII of cytochrome c oxidase
YLR464W	0.897252	0.417397	1.37706	0.168618
YMR156C	1.47721	0.0439156	1.37704	0.0134518	TPP1	DNA 3' phosphatase
YJL137C	1.29313	0.00949824	1.37634	0.0199335	GLG2	glycogen synthesis initiator
YOR158W	1.62522	0.00190735	1.37619	0.364955	PET123	Mitochondrial ribosomal protein of small subunit
YHR204W	0.951488	0.607768	1.37563	0.174498	HTM1	degradation lectin
YER095W	1.24433	0.0433563	1.37527	0.076531	RAD51	RecA homolog\; Rad51p colocalizes to ~ 65 spots with Dmc1p prior to synapsis (independently of ZIP1 and DMC1), and interacts with Rad52p and Rad55p\; human Rad51p homolog interacts with Brca2 protein which has been implicated in causing breast cancer
YIR039C	1.07377	0.19243	1.37485	0.0837768	YPS6	GPI-anchored aspartic protease
YIL138C	1.21789	0.484092	1.37417	0.217748	TPM2	Tropomyosin isoform 2
YLL020C	1.94879	5.376e-06	1.37348	0.066246
YBR123C	1.38586	0.000286221	1.37329	0.0746701	TFC1	transcription factor tau (TFIIIC) subunit 95
YDR438W	1.09587	0.0583836	1.37295	0.0469634
YDR154C	1.07874	0.874841	1.37249	0.120189
YDR218C	1.32344	0.0234642	1.37184	0.0944208	SPR28	septin-related protein expressed during sporulation
YPR103W	1.09679	0.101443	1.37165	0.243959	PRE2	proteasome subunit
YDL133W	1.05626	0.723646	1.37085	0.0523435
YMR273C	0.882071	0.0677277	1.37045	0.139531	ZDS1	peripheral plasma membrane protein
YPR127W	1.01616	0.88505	1.36994	0.22436
YOR303W	2.22579	0.0430859	1.36991	0.1594	CPA1	Carbamoyl phosphate synthetase, arginine specific
YBR045C	1.68203	0.13149	1.36972	0.0183493	GIP1	putative Glc7 regulatory subunit
YGL003C	1.0236	0.770892	1.36871	0.159169	CDH1	protein required for Clb2 and Ase1 degradation
YPL073C	1.18817	0.035137	1.36859	0.0713722
YHL021C	4.66425	0.0525262	1.36842	0.273875
YKL162C	1.12611	0.565224	1.36776	0.216588
YOR073W	1.03511	0.446565	1.36572	0.127474
YEL036C	0.988691	0.852775	1.36532	0.107491	ANP1	subunit of mannosyltransferase complex
YGL207W	1.35606	0.446836	1.3647	0.549227	SPT16	global regulator of transcription
YOR085W	0.958889	0.757906	1.36467	0.232145	OST3	34-kDa, gamma subunit of oligosaccharyl transferase glycoprotein complex
YML058W	2.08804	0.0821447	1.36451	0.0960803	SML1	Suppressor of mec lethality
YFL042C	1.04428	0.836237	1.36392	0.00244053
YBR281C	0.945387	0.0792539	1.36331	0.324673		Probable G-protein, -transducin type
YLR215C	0.904819	0.00369157	1.36315	0.115207	CDC123
YOL026C	1.4527	0.0820793	1.36306	0.0512912
YDR145W	1.45304	0.333906	1.36305	0.259303	TAF61	TFIID subunit
YLR157C	1.97523	0.0933355	1.36186	0.0662184	ASP3-2	nitrogen catabolite-regulated cell-wall L-asparaginase II
YDR533C	1.28307	0.322724	1.36042	0.0889348
YBR293W	0.876603	0.311743	1.3604	0.153431		Probable multidrug resistance protein
YBR297W	1.64332	0.0493355	1.36028	0.0308355	MAL33	MAL-activator protein
YDR304C	1.538	0.232806	1.36015	0.327128	CYP5	Cyclophilin D, Peptidyl-prolyl cis-trans isomerase D
YEL032W	1.01171	0.842823	1.35964	0.0879958	MCM3	component of DNA replication initiator complex
YFL038C	1.10803	0.502244	1.35929	0.0376635	YPT1	Ras-like GTP-binding protein\; most similar to mammalian Rab1A protein
YKL133C	1.33133	0.119101	1.35908	0.0472204		probable purine nucleotide-binding protein
YAR052C	1.25671	0.559225	1.35835	0.268762
YLR368W	1.01772	0.844942	1.35759	0.361221
YMR159C	1.45166	0.0182894	1.35753	0.00928299	APG16	Apg16p
YPL257W	1.69886	0.0510093	1.35742	0.00723201
YPL144W	0.882453	0.0309922	1.3572	0.221403
YDR097C	1.21302	0.0170255	1.35648	0.0617746	MSH6	Homolog of the human GTBP protein, forms a complex with Msh2p to repair both single-base and insertion-deletion mispairs, redundant with Msh3p in repair of insertion-deletion mispairs
YMR197C	1.58253	0.101258	1.35638	0.0922984	VTI1	Vti1p is a v-SNARE that interacts with two t-SNARES, Sed5p and Pep12p
YGR033C	1.32945	0.284767	1.35634	0.020678
YBR053C	1.43172	0.411333	1.35619	0.148814
YLR128W	1.13497	0.0227919	1.35619	0.0596198
YGR193C	1.31015	0.188267	1.35585	0.255409	PDX1	Protein X component of mitochondrial pyruvate dehydrogenase complex
YLR271W	1.10617	0.342437	1.35584	0.0498475
YKL040C	1.21596	0.314656	1.35464	5.14088e-05	NFU1	Nifu-like protein
YER066C-A	1.26018	0.0700212	1.35363	0.0400288
YDR016C	0.954183	0.54378	1.35361	0.209784	DAD1	Duo1 And Dam1 interacting\; localized to intranuclear spindles and spindle pole bodies
YPL172C	0.964102	0.691928	1.35319	0.248636	COX10	Putative farnesyl transferase required for heme A synthesis
YGL153W	1.10929	0.551765	1.35232	0.0295768	PEX14	component of peroxisomal import machinery
YNL007C	1.08333	0.626158	1.35215	0.305017	SIS1	sit4 suppressor, dnaJ homolog
YHR158C	0.918097	0.28895	1.35141	0.138847	KEL1	involved in cell fusion and morphology\; contains six Kelch repeats
YAR015W	0.982845	0.873765	1.35074	0.414682	ADE1	phosphoribosyl amino imidazolesuccinocarbozamide synthetase
YBR229C	1.16666	0.604643	1.3506	0.16077	ROT2	Glucosidase II
YNL159C	1.73488	0.000889962	1.35052	0.266498
YFL068W	1.11801	0.456226	1.35017	0.0265012
YMR316W	1.20224	0.0419883	1.35002	0.166568	DIA1	digs into agar
YNR032W	1.12063	0.220402	1.34984	0.0422458	PPG1	Serine\/threonine protein phosphatase type 2A
YHR099W	1.19319	0.464145	1.34782	0.0445904	TRA1	ATM\/Mec1\/TOR1+2-related
YER002W	0.989192	0.894736	1.34731	0.0287325
YOR035C	0.930137	0.600474	1.3471	0.120617	SHE4	Required for mother cell-specific HO expression
YIL157C	1.93694	0.0100258	1.34704	0.0640706
YAL065C	1.1822	0.142704	1.34589	0.485701
YML001W	0.899488	0.12456	1.34586	0.184875	YPT7	GTP-binding protein, rab family
YLR227C	0.940775	0.572723	1.34545	0.226942
YGR255C	1.57966	0.0190163	1.34528	0.373125	COQ6	COQ6 monooxygenase
YNL131W	1.46959	0.0109849	1.34465	0.13748	TOM22	Mitochondrial import receptor complex protein
YMR135C	1.17714	0.213395	1.34463	0.0656537
YKL143W	0.800072	0.0717243	1.34421	0.311679	LTV1	low temperature viability protein
YDL064W	1.02701	0.831843	1.34384	0.127659	UBC9	ubiquitin-conjugating enzyme
YJR023C	0.889769	0.211179	1.34369	0.482876
YIL097W	1.41052	0.000374299	1.34319	0.00388542	FYV10
YCR068W	1.24361	0.119269	1.34297	0.138873	CVT17	Putative lipase required for the breakdown of Cvt bodies and autophagic bodies
YDR068W	1.39189	0.140183	1.34253	0.0165827	DOS2
YMR084W	1.68208	0.0337301	1.34237	0.00473473
YFR052W	1.29328	0.36907	1.34207	0.00743658	RPN12	cytoplasmic 32 - 34 kDa protein
YBR165W	1.16927	0.145065	1.34201	0.537114	UBS1	positive regulator of CDC34, involved in ubiquitin-mediated degradation
YOR223W	1.43264	0.0386811	1.34179	0.0914743
YMR109W	1.82396	0.274537	1.34133	0.00640418	MYO5	myosin I
YPL062W	0.980914	0.444287	1.34106	0.158735
YLR169W	0.80828	0.0764894	1.34055	0.18793
YDR227W	1.44969	0.0415741	1.34035	0.469345	SIR4	regulator of silencing at HML, HMR, and telomeres
YLR349W	1.5576	0.215092	1.34032	0.156153
YLR225C	0.987694	0.937088	1.34003	0.0686301
YFL016C	1.37153	0.194766	1.34	0.125886	MDJ1	DnaJ homolog involved in mitochondrial biogenesis and protein folding
YLR052W	1.44432	0.03462	1.3385	0.169964	IES3
YHR002W	1.33947	0.155986	1.33831	0.062434		Mitochondrial carrier protein\/Grave's disease carrier protein
YIL047C	1.53282	0.463815	1.33825	0.281581	SYG1	plasma membrane protein
YPR067W	1.13403	0.175096	1.33824	0.043101	ISA2	Iron Sulfur Assembly -- IscA\/NifA homolog
YLR304C	1.07945	0.201287	1.3381	0.15904	ACO1	Aconitase, mitochondrial
YKR012C	0.974384	0.871427	1.33797	0.196752
YDR377W	1.12724	0.329205	1.33759	0.15013	ATP17	ATP synthase subunit f
YNL184C	0.948122	0.645318	1.33758	0.373007
YGR260W	0.825435	0.124354	1.33745	0.413782	TNA1	Tna1p is a high affinity nicotinic acid plasma membrane permease
YNL283C	0.874798	0.0663176	1.33728	0.152113	WSC2	Putative integral membrane protein containing novel cysteine motif. Similarity to SLG1 (WSC1), WSC3 and WSC4
YER143W	1.80859	0.100621	1.33692	0.17694	DDI1	DNA Damage Inducible\; binds to T- and V- snare complexes
YMR271C	1.15759	0.0243336	1.33674	0.0467562	URA10	Orotate phosphoribosyltransferase 2
YJR122W	1.37559	0.0550714	1.3366	0.0266595	CAF17	component of CCR4 transcriptional complex
YDR512C	1.22094	0.0835395	1.33642	0.0135963
YOR273C	1.28874	0.0758599	1.33576	0.0520994
YOL044W	1.86323	8.91908e-05	1.33564	0.0165329	PEX15	44 kDa phosphorylated integral peroxisomal membrane protein
YKR086W	1.36072	0.491394	1.33561	0.0948574	PRP16	putative ATP-binding protein
YNR028W	1.02301	0.562592	1.33533	0.0906997	CPR8	Cyclophilin
YPR191W	0.980356	0.806936	1.3351	0.110029	QCR2	40 kDa ubiquinol cytochrome-c reductase core protein 2
YML077W	0.874121	0.0349854	1.33507	0.0569585	BET5	Bet5p\/18kD component of TRAPP
YKL095W	1.83088	0.32761	1.33495	0.0981268	YJU2
YPL280W	1.30959	0.0142606	1.33482	0.0410544
YOL088C	1.2146	0.498815	1.33445	0.215769	MPD2	protein disulfide isomerase related protein
YML054C	1.33143	0.15872	1.33421	0.0231948	CYB2	Cytochrome b2 [L--lactate cytochrome-c oxidoreductase]
YOR298W	1.44246	0.295121	1.3342	0.000198515
YPR121W	1.06784	0.461007	1.33345	0.122134	THI22	THI for thiamine metabolism. Transcribed in the presence of low level of thiamine (10-8M) and turned off in the presence of high level (10-6M) of thiamine. Under the positive control of THI2 and THI3.
YPL160W	0.991457	0.937601	1.3334	0.148684	CDC60	cytosolic leucyl tRNA synthetase
YPL026C	0.937677	0.429109	1.33308	0.192893	SKS1	serine\/threonine protein kinase homologous to Ran1p
YKL198C	1.19837	0.0285067	1.3324	0.0127866	PTK1	probable serine\/threonine-specific protein kinase (EC 2.7.1.-)
YBR169C	1.09076	0.521441	1.33227	0.156521	SSE2	HSP70 family member, highly homologous to Sse1p
YNL196C	1.79932	0.0131672	1.33168	0.00683268	SLZ1	Sporulation-specific protein with a leucine zipper motif
YLR425W	1.03718	0.908566	1.33168	0.519769	TUS1	1307 AA, hydrophilic protein.
YER144C	1.63589	0.0364498	1.33111	0.160564	UBP5	Putative Ubiquitin-specific protease
YML085C	0.971075	0.77277	1.33081	0.219644	TUB1	alpha-tubulin
YHR116W	0.972473	0.777724	1.33038	0.251964
YPL168W	0.978938	0.868266	1.33011	0.311924
YDR313C	1.40959	0.00419265	1.32971	0.0121476	PIB1	phosphatidylinositol(3)-phosphate binding protein
YAR019C	1.52473	0.0763116	1.32914	0.00660114	CDC15	protein kinase domain
YCL066W	1.16479	0.0980369	1.32899	0.0456656	HMLALPHA1	transcription factor involved in the regulation of alpha-specific genes
YHR209W	1.41062	0.00523444	1.3289	0.0390496
YBL005W	1.66816	0.110469	1.32844	0.184185	PDR3	Pleiotropic drug resistance protein 3
YKR035C	1.79336	0.000367422	1.32799	0.0226628
YBL113C	1.91206	0.146487	1.32773	0.283025
YCR035C	1.288	0.283145	1.32772	0.074806	RRP43	Component of the exosome 3->5 exoribonuclease complex with Rrp4p, Rrp41p, Rrp42p and Dis3p (Rrp44p).
YAR018C	1.15392	0.453402	1.32754	0.385979	KIN3	protein kinase
YFR006W	1.23912	0.332334	1.32736	0.0561098
YOR037W	0.923408	0.354204	1.32704	0.258868	CYC2	cytochrome c mitochondrial import factor
YBR036C	1.80986	0.149079	1.3265	0.33992	CSG2	contains 9 or 10 putative membrane spanning regions\; putative Ca2+ binding protein (homology to EF-hand Ca2+ binding site)
YER136W	1.33615	0.0684466	1.32602	0.00366344	GDI1	GDP dissociation inhibitor
YJL104W	1.08807	0.525864	1.325	0.116698	MIA1
YDL233W	1.43992	0.00139316	1.32485	0.044582
YPL149W	2.16636	0.0173423	1.32478	0.297401	APG5	involved in autophagy
YBR204C	1.39495	0.00636636	1.32469	0.1452		Probable serine-active lipase, peroxisomal (EX 3.1.1.-)
YOL157C	1.0466	0.663405	1.32358	0.198402
YLL027W	1.57418	0.000846644	1.32336	0.0579865	ISA1	Iron Sulfur Assembly -- IscA\/NifA homolog
YOR042W	1.62301	0.0821878	1.32279	0.0558698
YHR056C	1.16675	0.781801	1.32157	0.231893	RSC30	ORF-X' in the CUP1 repeat region
YGR019W	1.29184	0.268803	1.32149	0.132287	UGA1	gamma-aminobutyrate (GABA) transaminase (4-aminobutyrate aminotransferase)
YDR242W	0.897405	0.0076831	1.32114	0.248321	AMD2	putative amidase
YDR014W	1.12073	0.141257	1.32051	0.0977127
YMR180C	1.0718	0.440962	1.32017	0.311927	CTL1	RNA triphosphatase
YMR018W	1.42982	0.0973062	1.31941	0.0869379
YDR488C	0.94799	0.446886	1.31851	0.197466	PAC11	similar to rat dynein intermediate chain
YCL028W	1.24964	0.104083	1.31801	0.589054	RNQ1	transferable epigenetic modifier
YER020W	2.08805	0.0914561	1.31729	0.061414	GPA2	nucleotide binding regulatory protein
YLR082C	1.33945	0.00106169	1.31693	0.120011	SRL2	Suppressor of rad53 lethality
YAL047C	1.17339	0.353616	1.31682	0.373454	SPC72	component of spindle pole bodies
YIR003W	1.17881	0.230004	1.31627	0.0719297
YOR179C	0.98219	0.846498	1.31627	0.214724
YOR135C	0.968001	0.833224	1.31601	0.222026
YOR171C	1.01319	0.768655	1.31554	0.0761613	LCB4	sphingoid long chain base (LCB) kinase
YOR227W	0.988325	0.719156	1.31509	0.307547
YOR352W	1.65847	0.0339545	1.31467	0.0708002
YNR041C	0.956799	0.743815	1.31455	0.203004	COQ2	para hydroxybenzoate: polyprenyl transferase
YOR324C	1.27595	0.072372	1.31404	0.0277107
YLR370C	1.0933	0.610181	1.3134	0.247717	ARC18	Arp2\/3 Complex Subunit
YMR291W	1.2567	0.178955	1.31284	0.325636
YGR225W	1.17005	0.0114286	1.31283	0.10163	AMA1	Required for sporulation\; highly induced during sporulation
YDR003W	1.66657	0.265277	1.31258	0.266303
YCL035C	1.37163	0.393177	1.31208	0.120303	GRX1	Glutaredoxin
YGR226C	0.85026	0.239763	1.3118	0.230372
YGL010W	1.46375	0.0567097	1.3117	0.14422
YER141W	1.2197	0.0835393	1.30992	0.0539644	COX15	cytochrome oxidase assembly factor
YOR292C	1.21704	0.0631905	1.3093	0.00602358
YDL216C	1.03968	0.314835	1.30921	0.41563	RRI1
YLL006W	1.19573	0.0771632	1.3089	0.0680341	MMM1	mitochondrial outer membrane protein
YLR254C	1.29491	0.201296	1.30888	0.0580264
YOL123W	1.26974	0.00513992	1.30865	0.142857	HRP1	putative polyadenylated-RNA-binding protein
YDR436W	1.14721	0.191365	1.30765	0.142715	PPZ2	serine-threonine phosphatase Z
YML120C	1.46033	0.00442083	1.30739	0.396285	NDI1	NADH dehydrogenase (ubiquinone)
YPR168W	1.06834	0.404932	1.30723	0.00918623	NUT2	21 kD mediator subunit of RNA polymerase II holoenzyme
YKL185W	0.9204	0.0337302	1.30683	0.140766	ASH1	probable purine nucleotide-binding protein
YAL040C	0.824963	0.115577	1.3063	0.358257	CLN3	G(sub)1 cyclin
YGL091C	1.09048	0.144182	1.30564	0.255152	NBP35	35 kDa nucleotide binding protein
YKR067W	1.38212	0.0539892	1.30534	0.000640353
YDR283C	1.05875	0.716797	1.30468	0.122036	GCN2	eukaryotic initiation factor 2 alpha (eIF2-alpha) kinase
YMR231W	0.953211	0.71636	1.30361	0.195804	PEP5	peripheral vaculor membrane protein\; putative Zn-finger protein
YMR279C	1.04021	0.83647	1.30297	0.128667
YDR287W	1.6963	0.0896353	1.30285	0.0495081
YJL099W	1.0996	0.198703	1.30269	0.116143	CHS6	involved in chitin biosynthesis
YNL014W	1.03238	0.821623	1.30263	0.136292	HEF3
YNR034W	1.23137	0.307519	1.30259	0.270476	SOL1	shows similarity to glucose-6-phosphate dehydrogenase non-catalytic domains\; homologous to Sol2p and Sol3p
YML091C	1.03054	0.851799	1.30252	0.21722	RPM2	subunit of mitochondrial RNase P
YMR002W	1.06885	0.317347	1.30231	0.0955375
YDR255C	1.60898	0.0810897	1.30192	0.264486
YKR017C	1.03341	0.788392	1.30183	0.194805
YOL162W	1.0669	0.183123	1.30114	0.170811
YKL146W	1.22785	0.0666468	1.30046	0.0687617
YDL210W	1.07695	0.178222	1.29987	0.338636	UGA4	GABA-specific transport protein
YGL072C	1.33578	0.295049	1.29937	0.234369
YDL007W	1.3585	0.582675	1.29933	0.257562	RPT2	(putative) 26S protease subunit
YCR074C	1.24029	0.085013	1.29896	0.215562
YOL054W	1.0651	0.247296	1.29846	0.075527
YPR200C	1.05361	0.25512	1.29836	0.22069	ARR2	Required for arsenate resistance
YMR182C	0.959728	0.680514	1.29828	0.462266	RGM1	Putative transcriptional repressor with proline-rich zinc fingers
YLR324W	1.29125	0.000359173	1.29813	0.00837525
YPL218W	0.890421	0.301522	1.29803	0.299643	SAR1	GTP-binding protein of the ARF family
YGL052W	1.15152	0.0806511	1.29764	0.0677069
YPL208W	0.969421	0.741971	1.29733	0.276064
YLL054C	0.92504	0.171485	1.29684	0.238343
YDL032W	1.30555	0.114113	1.29658	0.552153
YFR017C	1.6561	0.106866	1.29562	0.0657463
YKL189W	1.01832	0.905755	1.2952	0.224918	HYM1	The homologue in Aspergillus nidulans, hymA, is involved in development, see Karos, M. and Fischer, R. (1996). hymA (hypha-like metulae), a new developmental mutant of Aspergillus nidulans. Microbiol. 142:3211-3218.
YPL188W	1.06901	0.265529	1.29516	0.0218982	POS5	involved in oxidative stress
YJL046W	1.04815	0.398363	1.29463	0.137921
YDL045C	1.36792	0.306602	1.29365	0.365539	FAD1	FAD synthetase
YNR030W	0.992695	0.792841	1.2927	0.101906	ECM39	Member of the major facilitator superfamily
YGR270W	1.14889	0.289051	1.29254	0.233601	YTA7	26S proteasome ATPase
YPR140W	1.40904	0.136919	1.29238	0.229381
YJL200C	0.962927	0.744618	1.29201	0.154509
YLR155C	1.56899	0.188719	1.29186	0.100725	ASP3-1	nitrogen catabolite-regulated cell-wall L-asparaginase II
YMR314W	0.998499	0.984642	1.29158	0.0992563	PRE5	alpha-type of subunit of 20S proteasome
YMR047C	1.11721	0.0588765	1.29131	0.184066	NUP116	Nuclear pore complex protein that is member of GLFG repeat-containing family of nucleoporins and is highly homologous to Nup100p
YJR153W	1.08114	0.373342	1.29113	0.0734265	PGU1	Endo-polygalacturonase
YIL072W	0.887462	0.174688	1.29101	0.087905	HOP1	DNA binding protein
YNR076W	0.861391	0.302621	1.29097	0.159616	PAU6	Member of the seripauperin family
YDL110C	1.0238	0.357658	1.29056	0.291198
YER038C	1.07058	0.34998	1.29034	0.153204	KRE29
YDR121W	1.7576	0.000730715	1.28993	0.42226	DPB4	DNA polymerase II (epsilon) 4th subunit
YJL031C	1.01838	0.705213	1.28989	0.19833	BET4	Geranylgeranyltransferase Type II alpha subunit (PGGTase-II, alpha subunit)
YDL124W	1.68525	0.259771	1.28985	0.253061
YGR266W	1.12215	0.0297927	1.28924	0.117203
YDR408C	0.971022	0.684221	1.28922	0.0267975	ADE8	glycinamide ribotide transformylase
YLL052C	0.895345	0.0398348	1.28899	0.342651	AQY2	Aqy2p, putative aquaporin, member of MIP family
YIL030C	1.11243	0.406214	1.28875	0.211666	SSM4	integral nuclear membrane protein
YHR114W	0.823329	0.188498	1.28851	0.214377	BZZ1	Myo3\/5p-Bee1p-Vrp1p actin assembly complex component
YIL024C	0.968819	0.765431	1.28778	0.101937
YDR392W	1.26578	0.0640958	1.28759	0.163374	SPT3	transcription factor, member of the histone acetyltransferase SAGA complex
YJR049C	0.940579	0.698403	1.28736	0.204338	UTR1	involved in ferric reductase activity
YPR167C	0.92023	0.280064	1.28629	0.340135	MET16	3'phosphoadenylylsulfate reductase
YMR312W	0.905138	0.0891039	1.28543	0.102431
YLR176C	1.05309	0.609165	1.28535	0.229929	RFX1	DNA binding protein, homologous to mammalian RFX1-4 proteins
YHL048W	1.45078	0.0170287	1.28512	0.0847624	COS8	similar to other subtelomerically-encoded proteins
YMR226C	1.3389	0.0120216	1.28465	0.097861
YJR056C	1.19261	0.176649	1.28445	0.0441795
YEL057C	1.33066	0.116246	1.2836	0.183395
YKL194C	0.984542	0.931064	1.2831	0.0786452	MST1	mitochondrial threonine-tRNA synthetase
YMR085W	1.34409	0.0233594	1.28304	0.0750381
YDL010W	1.38313	0.185631	1.28288	0.182286
YJL194W	0.984075	0.882281	1.28272	0.199903	CDC6	pre-initiation complex component
YPR198W	1.75295	0.000596825	1.28179	0.0423659	SGE1	Member of drug-resistance protein family
YDR320C	1.40071	0.0997527	1.28174	0.118187	SWA2	Auxilin-like protein
YGR224W	1.00241	0.984443	1.28147	0.333104	AZR1	MFS-MDR
YPR027C	1.17169	0.0680497	1.28101	0.125492
YPL109C	1.50605	0.00697821	1.28095	0.0256893
YDR305C	1.87522	0.0222571	1.2808	0.16584	HNT2	member of the histidine triad family
YNL215W	1.60383	0.00088204	1.28076	0.147629	IES2
YNR053C	1.06567	0.573742	1.28031	0.134204
YNL030W	1.00007	0.99782	1.2803	0.135701	HHF2	Histone H4 (HHF1 and HHF2 code for identical proteins)
YBL078C	1.33777	0.102562	1.28019	0.169022	AUT7	Aut7p has homology to LC3, a microtubule-associated protein from rat.
YCR097W	1.61037	0.314648	1.28014	0.0806543	A1	haploid specific gene repressor
YPR061C	1.66251	0.0011655	1.27952	0.115903
YNL280C	1.02747	0.70523	1.27952	0.175834	ERG24	sterol C-14 reductase
YPL216W	0.917917	0.526089	1.27939	0.365704
YOR075W	1.04384	0.455642	1.27927	0.128329	UFE1	endoplasmic reticulum t-SNARE, coprecipitates with Sec20p, Tip1p. and Sec22p
YEL016C	1.77726	0.251209	1.27899	0.00228264
YNL239W	1.67043	0.310233	1.27883	0.000963179	LAP3	Aminopeptidase of cysteine protease family
YLR352W	1.38649	0.264006	1.27854	0.0800727
YAL034C	1.83116	0.0184523	1.27837	0.0440359	FUN19	Function unknown now
YDR057W	1.02625	0.785585	1.27831	0.130235
YLR085C	0.95447	0.766685	1.27821	0.173706	ARP6	Actin-related protein
YGR220C	1.09614	0.599566	1.27795	0.0940381	MRPL9	Mitochondrial ribosomal protein MRPL9 (YmL9) (E. coli L3) (human MRL3)
YDL234C	1.81693	0.000426435	1.27762	0.00376109	GYP7	GTPase-activating protein
YJL167W	1.33503	0.135024	1.27739	0.27367	ERG20	Farnesyl diphosphate synthetase (FPP synthetase)
YHR102W	1.24627	0.252279	1.27718	0.158052	KIC1	PAK\/Ste20 kinase family
YLL042C	1.01968	0.898249	1.27705	0.175917	APG10	involved in autophagy\; protein-conjugating enzyme involved in the Apg12p-Apg5p conjugation pathway
YLR151C	1.14722	0.13672	1.27702	0.126568	PCD1	coenzyme A diphosphatase
YDL002C	1.14598	0.691704	1.27625	0.271511	NHP10	HMG1-box containing protein
YKL193C	1.05601	0.787183	1.27586	0.308888	SDS22	Glc7p regulatory subunit
YOR244W	1.45304	0.00252876	1.27567	0.00647168	ESA1	Acetyltransferase in the SAS gene family
YPR123C	1.099	0.0545751	1.27558	0.345642
YIL113W	1.28979	0.00359349	1.27557	0.0236661
YDR432W	1.46943	0.27938	1.27532	0.21561	NPL3	nuclear shuttling protein with an RNA recognition motif
YJR039W	1.26326	0.119847	1.27522	0.0717504
YNL189W	0.970087	0.801907	1.27466	0.393622	SRP1	karyopherin alpha homolog of 60 kDa
YBL005W-B	1.23751	0.375052	1.27411	0.0589501		The TyB Gag-Pol protein. Gag processing produces capsid proteins. Pol is cleaved to produce protease, reverse transcriptase, and integrase activities.
YPL002C	1.53862	0.0702916	1.27385	0.11184	SNF8	involved in glucose derepression
YKL043W	1.42634	0.0926697	1.27381	0.000422411	PHD1	putative transcription factor
YNL275W	1.10672	0.630159	1.27346	0.098985
YKL147C	1.17185	0.0444719	1.27278	0.120498
YER046W	1.08801	0.200901	1.27249	0.0578418
YLR102C	1.25158	0.0126073	1.27235	0.0394184	APC9	subunit of the anaphase promoting complex (APC)
YDL062W	0.96786	0.168916	1.27225	0.376869
YCRX02C	1.34142	0.0315322	1.27209	0.100172
YNR038W	0.996069	0.971812	1.27074	0.34147	DBP6	putative RNA helicase
YCR082W	1.32464	0.489811	1.2706	0.206854
YER042W	1.04092	0.671356	1.27024	0.118412	MXR1	peptide methionine sulfoxide reductase
YGR015C	1.13492	0.00867785	1.27015	0.279849
YOR327C	1.99616	0.0411761	1.26959	0.0126357	SNC2	vesicle-associated membrane protein (synaptobrevin) homolog
YDR530C	1.02301	0.779945	1.26913	0.225451	APA2	5',5'''-P-1,P-4-tetraphosphate phosphorylase II
YGR190C	1.4181	0.129189	1.26903	0.0494496
YMR135W-A	0.911924	0.424113	1.26895	0.485495
YKR006C	0.920039	0.0513487	1.26882	0.11333	MRPL13	mitochondrial ribosomal protein YmL13
YKR045C	1.26796	0.242091	1.26881	0.0294421
YCR015C	0.994332	0.972614	1.26875	0.577793
YNL271C	0.989845	0.708898	1.26805	0.243045	BNI1	contains formin homology domains\; homologous to BNR1 (BNI1 related protein)
YGL154C	1.33029	0.245337	1.26804	0.289221	LYS5	aminoadipate-semialdehyde dehydrogenase small subunit (alpha-aminoadipate reductase)
YDR399W	0.762287	0.00296282	1.26774	0.455235	HPT1	hypoxanthine guanine phosphoribosyltransferase
YMR133W	1.04291	0.29153	1.26733	0.104624	REC114	mRNA is induced early in sporulation
YDR486C	0.992228	0.943237	1.26681	0.410017	VPS60
YFL051C	1.20727	0.0260144	1.26664	0.0345011
YPR081C	0.958362	0.421777	1.26649	0.230344
YML129C	0.980498	0.906321	1.26645	0.306768	COX14	mitochondrial membrane protein
YLR070C	1.13978	0.204772	1.26629	0.143631
YLR033W	0.980605	0.860159	1.26594	0.351033
YJR058C	1.32812	0.216468	1.26574	0.113271	APS2	Clathrin-associated protein, small subunit
YOR033C	1.13073	0.464432	1.26545	0.319016	EXO1	exonuclease
YIL172C	1.27477	0.0510281	1.26536	0.0938499		putative alpha glucosidase
YPR184W	1.05635	0.13289	1.26526	0.0548235	GDB1	the enzyme that debranches the glycogen having a glucanotranferase + 1-6amyloglucosidase activity
YDR177W	1.7807	0.110788	1.26517	0.0791408	UBC1	ubiquitin-conjugating enzyme
YDR149C	1.05962	0.549312	1.26496	0.226025
YLR201C	1.1554	0.291569	1.26443	0.0178673
YIL022W	0.951678	0.685608	1.2639	0.307287	TIM44	48.8 kDa protein involved in mitochondrial protein import
YNL225C	1.00427	0.895646	1.26369	0.192902	CNM67	Spindle pole body protein involved in nuclear migration
YIL106W	1.42821	0.00125417	1.26353	0.280654	MOB1	(putative) transcriptional regulator involved in mitosis
YPR148C	1.05685	0.850202	1.26344	0.350851
YAR062W	1.41477	0.0325691	1.26339	0.00938781
YJR017C	0.977047	0.893262	1.26321	0.306171	ESS1	Peptidyl-prolyl cis\/trans isomerase (PPIase)
YKL099C	0.878508	0.109619	1.26258	0.329277
YMR077C	1.53302	0.0705104	1.26252	0.045302	VPS20
YER185W	1.24814	0.00805093	1.26171	0.210767
YOR090C	1.22344	0.141512	1.2616	0.24794	PTC5	Type 2C Protein Phosphatase
YPR115W	1.10104	0.214336	1.26134	0.159941
YDL158C	1.14024	0.375983	1.26057	0.304976
YDR536W	1.04418	0.562516	1.2604	0.276197	STL1	sugar transporter-like protein
YPR154W	2.50501	0.060166	1.26008	0.0790047
YOR181W	0.986266	0.906701	1.25988	0.362256	LAS17	Actin assembly factor
YKL196C	0.944477	0.710528	1.25975	0.232764	YKT6	v-SNARE
YAL027W	1.02276	0.928926	1.25959	0.365201
YLR318W	1.06883	0.276908	1.25954	0.110124	EST2	103 kD basic protein, catalytic subunit of telomerase
YDR390C	1.1743	0.0237155	1.25953	0.210743	UBA2	similar to ubiquitin activating enzyme (E1)
YDR366C	1.62889	0.0402015	1.25889	0.000876639
YPR112C	0.9901	0.961704	1.25866	0.550885	MRD1	Multiple RNA Binding Domain
YNL039W	1.05671	0.72842	1.25853	0.276288	TFC5	90 kd subunit of TFIIIB, also called TFIIIB90 or B'' or B''90 component
YPL118W	1.11764	0.647861	1.2585	0.0974737	MRP51	Component of small subunit of the mitochondrial ribosome
YIL137C	1.15044	0.340262	1.25843	0.027531
YMR139W	1.30696	0.569741	1.25842	0.0294845	RIM11	Serine\/threonine protein kinase, phosphorylates the mitotic activator IME1
YPR129W	1.02613	0.707153	1.25777	0.2393	SCD6	suppressor of clathrin deficiency
YNL042W	0.927523	0.554787	1.25686	0.398817	BOP3	Bypass of PAM1
YMR052W	1.51785	0.152477	1.25685	0.545987	FAR3	involved in the cell cycle
YPL185W	1.43692	0.123468	1.25654	0.0178623
YJL004C	1.19085	0.248446	1.25644	0.00802365	SYS1	Multicopy suppressor of ypt6 null mutation
YLL004W	1.23492	0.32731	1.25602	0.28608	ORC3	Third subunit of the origin recognition complex
YLR119W	1.01445	0.873185	1.25562	0.0962033	SRN2	may be involved in RNA export from nucleus
YPL214C	0.946473	0.641909	1.25522	0.282489	THI6	TMP pyrophosphorylase, hydroxyethylthiazole kinase
YDR332W	0.950065	0.59264	1.25519	0.175636
YDR107C	1.28369	0.0429957	1.25516	0.270409
YER039C	1.16269	0.12765	1.25457	0.10418	HVG1	(putative) nucleotide sugar transporter
YML002W	1.18467	0.129063	1.25446	0.0406858
YIL152W	1.21046	0.301682	1.25443	0.212738
YHR074W	1.38117	0.063862	1.25428	0.319904	QNS1
YHR157W	1.0397	0.643852	1.2541	0.139415	REC104	mRNA is induced early in meiosis
YLR083C	1.01724	0.926549	1.25407	0.219386	EMP70	endosomal membrane protein
YHR090C	1.23417	0.00694064	1.25406	0.154324	YNG2	NuA4 histone acetyltransferase complex component
YER178W	1.3953	0.416247	1.25388	0.312741	PDA1	alpha subunit of pyruvate dehydrogenase (E1 alpha)
YHR213W	1.31611	0.0509498	1.25337	0.0731098
YDL194W	1.24857	0.351386	1.25332	0.0985818	SNF3	glucose sensor
YHR198C	1.27275	0.297754	1.25301	0.14597
YLL002W	1.09068	0.362541	1.25283	0.241754	REM50	diepoxybutane and mitomycin C resistance
YJR119C	1.02882	0.409273	1.25281	0.157964
YCL047C	2.0135	0.00973853	1.25251	0.168941
YER116C	1.13652	0.215713	1.25224	0.125279	SLX8
YPL268W	1.04472	0.696137	1.25219	0.266038	PLC1	phosphoinositide-specific phospholipase C
YOR389W	1.27992	0.18298	1.25148	0.00111014
YPL121C	1.16418	0.163964	1.25084	0.245699	MEI5	involved in meiosis, synapsis and recombination
YDL060W	0.840694	0.0292222	1.25041	0.275679
YDR100W	1.21362	0.261924	1.25022	0.247784
YFR026C	1.47881	0.0662045	1.25003	0.21648
YKL135C	1.27898	0.199236	1.24982	0.0496028	APL2	Beta-adaptin, large subunit of the clathrin-associated protein (AP-1) complex
YJR155W	1.28095	0.0841656	1.24963	0.0158138	AAD10	Hypothetical aryl-alcohol dehydrogenase (AAD)
YJL101C	0.959293	0.590201	1.24962	0.0397225	GSH1	gamma-glutamylcysteine synthetase
YER124C	1.27415	0.219185	1.24939	0.0832785
YCR030C	0.994219	0.984205	1.24936	0.473234
YJL219W	1.32715	0.0432083	1.24895	0.0340354	HXT9	hexose permease
YNL265C	1.13675	0.246302	1.24892	0.153788	IST1	Similar to Nuf1p (spindle pole body component)
YPL016W	1.1997	0.0423447	1.2489	0.0517814	SWI1	Zinc-finger transcription factor
YGR048W	1.15858	0.00843662	1.24883	0.11006	UFD1	ubiquitin fusion degradation protein
YCLX03C	1.48791	0.229668	1.24856	0.403212
YGL047W	1.06684	0.0276079	1.24821	0.0489012
YBR193C	0.87809	0.290321	1.24816	0.328634	MED8	Stoichiometric member of mediator complex
YPR101W	1.42876	0.00037105	1.24815	0.145906	SNT309	Component of a protein complex associated with the splicing factor Prp19p.
YLR133W	0.924769	0.0436757	1.24813	0.188525	CKI1	choline kinase
YOR178C	0.938604	0.635026	1.24802	0.366632	GAC1	Regulatory subunit for Glc7p
YNL285W	0.90221	0.428919	1.24771	0.330278
YIL143C	1.22432	0.114211	1.24762	0.0139849	SSL2	DNA helicase homolog\; homolog of human XPBC, ERCC3
YGR256W	1.00502	0.97325	1.24688	0.61546	GND2	6-phosphogluconate dehydrogenase
YOR275C	1.08654	0.522357	1.24629	0.268046
YDL203C	1.06902	0.6966	1.24506	0.315227
YPL116W	1.11255	0.0919608	1.24422	0.210674	HOS3	sequence similar to the histone deacetylase Hda1p
YNL139C	1.15574	0.0013505	1.2442	0.339149	RLR1	Involved in transcription
YCR008W	1.6737	0.0583329	1.2439	0.337429	SAT4	Ser\/Thr protein kinase
YDR388W	1.31855	0.156284	1.2438	0.0576929	RVS167	(putative) cytoskeletal protein
YLR193C	1.15124	0.104431	1.24368	0.00343497
YFR034C	1.1916	0.00536623	1.24365	0.171948	PHO4	myc-type helix-loop-helix transcription factor
YIL032C	1.02068	0.903384	1.24315	0.32952
YBR134W	0.936997	0.884373	1.24312	0.695502
YMR306C-A	1.13849	0.039378	1.24298	0.049103
YKR077W	1.06211	0.487883	1.24289	0.0382962
YDR195W	1.41998	0.279621	1.24268	0.197937	REF2	RNA-binding protein, involved in mRNA processing
YGR221C	1.03908	0.726497	1.24147	0.127275	TOS2
YNL235C	0.834942	0.167466	1.24142	0.4774
YML088W	1.12906	0.545574	1.24123	0.230846	UFO1	F-box protein
YJL161W	1.41917	0.0277657	1.24084	0.141472
YBR117C	1.49784	0.0370832	1.24083	0.185753	TKL2	transketolase, homologous to tkl1
YER045C	1.06032	0.66485	1.2405	0.344965
YGL141W	0.891572	0.417835	1.24025	0.239105	HUL5	ubiquitin-protein ligase (E3)
YCL067C	1.45481	0.13198	1.23996	0.00971505	HMLALPHA2	Mating type protein alpha-2
YKR011C	1.59206	0.0027947	1.23994	0.119266	TOS5
YLR290C	1.14093	0.065308	1.2399	0.15503
YLL067C	1.12272	0.287843	1.23954	0.0154379
YPR077C	1.19092	0.283926	1.23944	0.171555
YIL026C	0.926386	0.560583	1.23939	0.0947027	IRR1	cohesin complex subunit
YMR078C	1.11441	0.129352	1.23933	0.0531934	CTF18	(putative) involved in chromosome transmission during mitosis
YJR018W	1.00995	0.939176	1.23883	0.146067
YLR117C	1.18379	0.389531	1.23872	0.0637414	CLF1	pre-mRNA splicing factor
YNL091W	1.12002	0.131388	1.23844	0.246808
YKL038W	1.09729	0.0187717	1.23838	0.109971	RGT1	transcriptional repressor and activator
YDR105C	1.07001	0.582059	1.23795	0.265875
YNL277W	1.1238	0.334791	1.23784	0.292348	MET2	homoserine O-trans-acetylase
YPL258C	1.13529	0.0824473	1.23783	0.0599568	THI21	THI for thiamine metabolism. Transcribed in the presence of low level of thiamine (10-8M) and turned off in the presence of high level (10-6M) of thiamine. Under the positive control of THI2 and THI3.
YMR171C	1.19626	0.301182	1.23776	0.0242208
YOR131C	0.886129	0.170195	1.2375	0.289549
YLR019W	1.25204	0.355852	1.23748	0.288811	PSR2	Plasma membrane Sodium Response 2
YDR482C	1.04078	0.637618	1.23713	0.316697
YCLX05C	1.12818	0.663357	1.23705	0.207646
YOR121C	0.918884	0.440532	1.23647	0.258059
YDR043C	2.32915	0.0485357	1.23631	0.0872983	NRG1	transcriptional repressor which can bind to UAS-1 in the STA1 promoter and which can interact with Ssn6p
YJL152W	1.1841	0.00110476	1.23594	0.0194189
YNL214W	1.47427	0.135767	1.23582	0.000224986	PEX17	23 kDa peroxisome associated protein, binds Pex14p
YKR064W	1.07815	0.227831	1.23566	0.269462
YDL199C	1.10948	0.127515	1.23562	0.312613
YKL042W	0.974069	0.674536	1.23559	0.265093	SPC42	component of the spindle pole body
YMR115W	1.47445	0.0180455	1.23549	0.0546054
YGR202C	1.17449	0.689634	1.23549	0.291031	PCT1	phosphorylcholine transferase\; or cholinephosphate cytidylyltransferase
YER093C	0.960357	0.323707	1.235	0.288269
YGR246C	1.06658	0.648234	1.23499	0.00856641	BRF1	RNA polymerase III transcription factor with homology to TFIIB
YKR008W	0.941362	0.462115	1.23445	0.201383	RSC4	Member of RSC complex.
YJR013W	0.841668	0.176175	1.23406	0.0955336
YNR007C	1.045	0.245607	1.2338	0.0353864	AUT1	Involved in autophagocytosis.
YPR079W	0.900092	0.102288	1.23372	0.282596
YAR002C-A	1.03079	0.841765	1.2337	0.588804
YJR159W	1.04128	0.436922	1.23339	0.220779	SOR1	sorbitol-induced sorbitol dehydrogenase
YIL154C	1.28525	0.00777472	1.23294	0.149245	IMP2'	transcription factor
YDL207W	1.02187	0.857109	1.23282	0.276223	GLE1	Nuclear-export-signal (NES)-containing protein
YML035C	1.19669	0.22232	1.23267	0.261206	AMD1	putative alpha-mannosidase
YPL068C	1.09545	0.534853	1.23264	0.191047
YGR047C	1.0634	0.405918	1.2324	0.0150819	TFC4	transcription factor tau (TFIIIC) subunit 131
YMR045C	1.16924	0.463195	1.23185	0.106883		TyB Gag-Pol protein. Gag processing produces capsid proteins. Pol is cleaved to produce protease, reverse transcriptase and integrase activities.
YKL139W	0.966588	0.630753	1.23166	0.241798	CTK1	alpha subunit of the kinase which phosphorylates the RNA polymerase largest subunit CTD (carboxyl-terminal domain)
YAL049C	0.939738	0.643503	1.23157	0.597871
YMR053C	1.24368	0.256368	1.23153	0.00313233	STB2	Sin3p binding protein
YOL084W	1.08495	0.0617114	1.23153	0.0191822	PHM7
YOL165C	1.37513	0.0149804	1.23141	0.132074	AAD15	Hypothetical aryl-alcohol dehydrogenase (AAD)
YAL030W	1.09913	0.246668	1.2314	0.276568	SNC1	homolog of Snc2p, vesicle-associated membrane protein (synaptobrevin) homolog, forms a complex with Snc2p and Sec9p
YDL155W	1.01654	0.853564	1.23103	0.38102	CLB3	G(sub)2-specific B-type cyclin
YBR089C-A	1.02421	0.74092	1.23012	0.267654	NHP6B	11-kDa nonhistone chromosomal protein
YML059C	1.11146	0.345557	1.22998	0.0272142
YAL013W	1.17485	0.471668	1.22979	0.266044	DEP1	regulation of phospholipid metabolism
YER083C	1.2922	0.0099501	1.22979	0.177498
YLR079W	0.977541	0.780227	1.22948	0.00257848	SIC1	Cdc28p-Clb5 protein kinase inhibitor
YDR200C	1.0574	0.37247	1.2294	0.110254
YDR340W	0.982904	0.663935	1.22931	0.369371
YDR293C	1.11708	0.130824	1.2292	0.411818	SSD1
YAL020C	1.19739	0.297138	1.22906	0.468279	ATS1	similarity to human RCC1 protein
YNL040W	0.953534	0.469242	1.22897	0.344207
YDR072C	1.05371	0.697467	1.2289	0.134841	IPT1	inositolphosphotransferase 1
YNL328C	1.06904	0.0760493	1.22881	0.229697	MDJ2	Mitochindrial chaperonin
YCR037C	1.15467	0.540079	1.2288	0.224974	PHO87	phosphate permease
YHR113W	1.16196	0.397689	1.22845	0.0304715		Vacuolar aminopeptidase
YGL036W	1.2661	0.0482024	1.22818	0.0902868	MTC2	Mtf1 Two Hybrid Clone 2
YJR075W	1.00782	0.964784	1.22813	0.233325	HOC1	putative mannosyltransferase
YPL003W	1.92709	0.000619488	1.22774	0.029533	ULA1	Rub1p activating protein
YKL013C	1.00624	0.918388	1.22749	0.0350431	ARC19	involved in cortical actin patch integrity
YCR028C	1.51353	0.0336726	1.22748	0.261531	FEN2	Amino acid permease
YML034W	1.33227	0.0059202	1.22691	0.00638116	SRC1	Spliced mRNA and Cell cycle regulated gene
YEL024W	1.04873	0.344621	1.22651	0.157778	RIP1	Rieske iron-sulfur protein of the mitochondrial cytochrome bc1 complex
YPL202C	1.10934	0.144662	1.2265	0.0105718
YDL115C	1.24636	0.264607	1.2263	0.11756
YDR001C	1.36508	0.381807	1.22604	0.515005	NTH1	neutral trehalase
YER047C	1.05266	0.42216	1.22602	0.410363	SAP1	member of the AAA ATPase family of proteins
YLR366W	1.07501	0.0332861	1.2259	0.582086
YML070W	1.1265	0.2718	1.22554	0.135341	DAK1	putative dihydroxyacetone kinase
YAL045C	0.982868	0.942817	1.22538	0.704477
YOR030W	1.02551	0.797434	1.22525	0.252951	DFG16	involved in filamentous growth
YER051W	0.942615	0.64943	1.22514	0.307382
YKL202W	1.14951	0.358941	1.22485	0.0680456
YJL140W	1.55595	0.0131405	1.22463	0.0369866	RPB4	fourth-largest subunit of RNA polymerase II
YLR035C	0.91181	0.018958	1.22446	0.507505	MLH2	MutL Homolog
YNL148C	1.96718	0.19308	1.22443	0.0796197	ALF1	cofactor B
YKL191W	0.905101	0.544308	1.2244	0.348477	DPH2	diphthamide synthesis protein
YDR292C	1.07825	0.375895	1.22412	0.380391	SRP101	signal recognition particle receptor - alpha subunit
YHR080C	1.19243	0.120465	1.22373	0.0475205
YLR298C	1.1544	0.328323	1.22343	0.161569	YHC1	U1 snRNP protein
YDR082W	1.11027	0.0129658	1.22316	0.0590157	STN1	involved in telomere length regulation
YBR012W-A	1.42976	0.578514	1.22315	0.363781		TyA gag protein. Gag processing produces capsid proteins.
YOR256C	1.08983	0.0352592	1.22306	0.00970156
YNR039C	1.06689	0.777374	1.22273	0.365246	ZRG17	zinc-regulated gene
YBR115C	0.994305	0.865517	1.22264	0.277929	LYS2	alpha aminoadipate reductase
YDL209C	0.940358	0.592693	1.22218	0.279697
YHR205W	1.1784	0.148599	1.22177	0.200272	SCH9	cAMP-dependent protein kinase homolog, suppressor of cdc25ts
YNL064C	0.904621	0.549917	1.22159	0.409515	YDJ1	yeast dnaJ homolog (nuclear envelope protein)\; heat shock protein
YOL004W	1.05499	0.101696	1.22156	0.0453332	SIN3	DNA binding protein involved in transcriptional regulation
YMR172C-A	1.09519	0.542529	1.22101	0.187006
YGR028W	1.41561	0.0572718	1.22071	0.194003	MSP1	40 kDa putative membrane-spanning ATPase
YPL015C	1.24651	0.0563039	1.22053	0.111348	HST2	similar to Sir2p
YFL063W	1.22924	5.68481e-05	1.22031	0.10734
YEL038W	1.15441	0.135942	1.2203	0.278469	UTR4
YNR077C	1.18006	0.00333581	1.22028	6.25644e-05
YDR532C	1.10777	0.636611	1.22008	0.232789	KRE28
YGR237C	1.84072	0.100419	1.22004	0.305463
YFR049W	1.20347	0.0786942	1.21961	0.0311818	YMR31	mitochondrial ribosomal protein (precursor)
YOR219C	0.975546	0.499729	1.2192	0.393969	STE13	dipeptidyl aminopeptidase
YGL152C	1.27907	0.279198	1.21907	0.421771
YKR022C	1.05546	0.230131	1.21903	0.0974441
YBR289W	1.10257	0.557594	1.21895	0.183216	SNF5	subunit of the chromatin remodeling Snf\/Swi complex
YJR040W	1.03186	0.785602	1.21873	0.0964804	GEF1	putative transport protein involved in intracellular iron metabolism
YKR015C	0.938359	0.491255	1.21865	0.315621
YDR359C	1.13882	0.0205971	1.21865	0.0168709	VID21	vacuolar import degradation
YDR291W	1.13176	0.54301	1.21811	0.444796
YDR463W	1.19027	0.357295	1.21807	0.0584678	STP1	Nuclear-localized protein containing zinc finger motifs
YAL067C	1.0246	0.944781	1.21789	0.516062	SEO1	putative permease
YOR364W	1.05997	0.196307	1.2172	0.20055
YJL149W	1.21212	0.0184005	1.21689	0.247832
YDR344C	1.05888	0.782271	1.21669	0.352154
YNL197C	1.33043	0.10091	1.21664	0.187952	WHI3	Putative RNA binding protein
YKL094W	0.923439	0.217143	1.21662	0.0485483	YJU3
YDR197W	1.29022	0.193596	1.21657	0.097908	CBS2	cytochrome b translational activator
YPL020C	1.16525	0.0853	1.21636	0.0952505	ULP1	Smt3-processing enzyme
YBR269C	1.21128	0.409225	1.21626	0.40433
YBR058C	1.27906	0.278155	1.21595	0.397934	UBP14	Ubiquitin-specific protease
YNL227C	1.08935	0.655993	1.21592	0.0733717
YMR316C-A	0.972732	0.551334	1.21541	0.212478
YNL034W	0.95855	0.327547	1.21532	0.251953
YHR156C	1.05963	0.224449	1.21524	0.299835
YMR293C	1.2053	0.01994	1.21519	0.038526
YGL259W	1.17665	0.371109	1.21462	0.178597	YPS5	GPI-anchored aspartic protease
YIL125W	1.23505	0.0473462	1.21462	0.00502354	KGD1	alpha-ketoglutarate dehydrogenase
YPR076W	0.99122	0.960676	1.21453	0.388053
YER135C	1.0984	0.535871	1.21411	0.384146
YOR089C	1.63031	0.140481	1.21407	0.0148401	VPS21	small GTP-binding protein\; geranylgeranylated\; geranylgeranylation required for membrane association\; also involved in endocytosis post vesicle internalization
YPL022W	1.03767	0.777487	1.21391	0.425799	RAD1	UV endonuclease
YHR200W	1.16886	0.26174	1.21387	0.0427009	RPN10	homolog of the mammalian S5a protein, component of 26S proteasome
YLR465C	1.1147	0.122156	1.21385	0.237941
YEL066W	1.18679	0.105151	1.21384	0.0298124	HPA3	histone acetyltransferase complex subunit
YNL187W	0.919121	0.159428	1.2138	0.4875
YMR178W	0.889413	0.366918	1.21348	0.466837
YCR050C	1.27641	0.552487	1.21337	0.368884
YKR087C	1.28087	0.0664263	1.21235	0.00239844
YMR138W	0.890007	0.210753	1.2122	0.474683	CIN4	GTP-binding protein
YDR353W	0.798744	0.144378	1.21189	0.394365	TRR1	Thioredoxin reductase
YJR157W	1.04647	0.262797	1.21183	0.116698
YPL170W	1.05066	0.734217	1.21174	0.45745
YLR416C	1.0388	0.511055	1.21155	0.49514
YJL164C	1.03381	0.652089	1.2112	0.0146473	TPK1	putative catalytic subunit of cAMP-dependent protein kinase
YIR006C	1.34725	0.00381866	1.21103	0.121623	PAN1	polyA-specific ribonuclease
YNL321W	1.21588	0.0512786	1.21097	0.0773888
YMR055C	1.16472	0.0363331	1.21095	0.0437424	BUB2	involved in cell cycle checkpoint
YKL126W	1.17726	0.0818013	1.21078	0.0817676	YPK1	76.5 kDa Serine\/threonine protein kinase with similarity to protein kinase C, is 90\% identical to Ypk2p
YJL098W	0.825631	0.0254721	1.21043	0.476767	SAP185	Sit4p-associated protein
YKL086W	1.16463	0.57469	1.21031	0.0503318
YKR036C	1.39922	0.143419	1.21024	0.378675	CAF4	component of CCR4 transcriptional complex
YML121W	0.967423	0.576637	1.21017	0.164314	GTR1	Putative small GTPase
YPR204W	1.0185	0.774445	1.21008	0.0364427
YNL284C	1.16906	0.031562	1.20999	0.0172572	MRPL10	Mitochondrial ribosomal protein MRPL10 (YmL10)
YOR312C	1.00668	0.920807	1.20982	0.106661	RPL20B	60S ribosomal protein L20B (L18B)
YIL009W	0.955986	0.464084	1.2097	0.0209712	FAA3	Acyl CoA synthase
YER084W	0.906681	0.352487	1.20959	0.313851
YCL038C	0.981529	0.862993	1.20929	0.352691		Membrane transporter
YNL180C	1.16383	0.15269	1.2092	0.00765794	RHO5	Rho family GTPase
YAL066W	1.16351	0.089917	1.20903	0.677285
YGR222W	1.04625	0.630311	1.20898	0.365105	PET54	translational activator of cytochrome c oxidase subunit III
YNR019W	1.2506	0.0129298	1.20894	0.119475	ARE2	Acyl-CoA cholesterol acyltransferase (sterol-ester synthetase)
YDR338C	1.10413	0.540092	1.20884	0.427431
YOR366W	1.09737	0.0402232	1.20869	0.336626
YPL206C	0.908122	0.329808	1.20857	0.107924
YML114C	1.03108	0.686828	1.20857	0.0961615	TAF65	TAF65, subunit of transcription factor TFIID
YBL073W	1.18477	0.116997	1.20827	0.425006
YOL018C	1.42554	0.00433827	1.20792	0.0308689	TLG2	tSNARE that affects a Late Golgi compartment
YHR146W	2.1541	0.133504	1.20775	0.355915	CRP1
YER150W	1.44724	0.0987932	1.20733	0.10786	SPI1	similar to Sed1\; highly expressed in stationary phase
YNL330C	1.25342	0.0873195	1.20704	0.206649	RPD3	histone deacetylase
YOR372C	0.884155	0.38808	1.20703	0.309251	NDD1	Nuclear Division Defective 1
YNR068C	0.939353	0.386773	1.20695	0.408238
YPL140C	1.19221	0.0525542	1.2063	0.0251685	MKK2	protein kinase
YNL141W	1.05633	0.346441	1.2063	0.304845	AAH1	adenine aminohydrolase (adenine deaminase)
YDR351W	1.0421	0.510623	1.20622	0.0470057	SBE2	involved in bud growth
YDR248C	0.957789	0.863268	1.20618	0.120506
YJR031C	1.10818	0.261916	1.20613	0.00922351	GEA1	GDP\/GTP exchange factor
YLR322W	1.07448	0.173434	1.20613	0.323638
YBL016W	1.05166	0.140404	1.20586	0.347994	FUS3	cdc2+\/CDC28 related kinase with positive role in conjugation
YGR030C	1.0284	0.761446	1.20581	0.214386	POP6	integral subunit of RNase P and apparent subunit of RNase MRP
YGR275W	1.14566	0.0983036	1.20564	0.19935	RTT102	regulator of Ty1 transposition
YPR029C	1.21435	0.0136733	1.20561	0.410763	APL4	Gamma-adaptin, large subunit of the clathrin-associated protein (AP) complex
YPL075W	1.08605	0.284187	1.20527	0.420383	GCR1	trans-acting positive regulator of the enolase and glyceraldehyde-3-phosphate dehydrogenase gene families
YKL112W	1.072	0.0699058	1.20519	0.0109505	ABF1	transcriptional activator and ARS1 binding protein
YFL040W	0.956763	0.593923	1.20507	0.528862
YDR063W	1.05764	0.575594	1.20503	0.243275
YAR066W	1.12372	0.0997276	1.20494	0.166316
YDR419W	1.0272	0.674803	1.20494	0.0698486	RAD30	similar to E. coli DinB and S. cerevisiae REV1
YMR196W	1.5444	0.0469919	1.20489	0.373524
YIR018W	1.31902	0.0021976	1.20489	0.0274395	YAP5	bZIP transcription factor
YGR212W	1.0596	0.435385	1.20472	0.340618
YLR320W	1.14123	0.369786	1.20454	0.380984
YJL186W	1.03658	0.7615	1.20442	0.347717	MNN5	putative Golgi alpha-1,2-mannosyltransferase
YOR003W	1.33906	0.0431151	1.20434	0.0441472	YSP3	subtilisin-like protease III
YOR386W	1.22706	0.0297569	1.20401	0.215686	PHR1	photolyase
YMR021C	1.08042	0.299245	1.20394	0.310806	MAC1	metal-binding transcriptional activator
YBR225W	0.861114	0.563102	1.203	0.678827
YDR173C	1.41835	0.106579	1.20209	0.157033	ARG82	dual-specificity inositol 1,4,5-trisphosphate 6-kinase\/inositol 1,4,5,6-tetrakisphosphate 3-kinase (IP3 6-\/IP4 3-kinase)
YML007W	1.04567	0.545242	1.20204	0.0382685	YAP1	jun-like transcription factor
YGR143W	1.24746	0.232804	1.20191	0.484111	SKN1	encodes a predicted type II membrane protein highly homologous to Kre6p
YKR010C	0.983349	0.465203	1.20169	0.428724	TOF2	topoisomerase I interacting factor 2
YPR180W	1.51732	0.0138325	1.20163	0.516564	AOS1	Similar to ubiquitin activating proteins
YFR016C	1.06304	0.671047	1.20131	0.333935
YDR275W	1.33329	0.301353	1.20128	0.137936
YMR006C	1.11764	0.0201386	1.20065	0.30109	PLB2	lysophospholipase\/phospholipase B
YDR296W	0.913271	0.265075	1.20063	0.259027	MHR1	Involved in mitochondrial homologous DNA recombination
YPL236C	1.14445	0.104709	1.20049	0.158301
YGR006W	1.23919	0.0503029	1.20028	0.107899	PRP18	RNA splicing factor associated with U5 snRNP
YIL084C	0.832774	0.237051	1.20019	0.423273	SDS3	(putative) transcriptional regulator
YBR125C	1.10246	0.610614	1.19999	0.373296	PTC4	Type 2C protein phosphatase
YDR053W	1.09198	0.438248	1.19976	0.472889
YLR173W	0.91819	0.629283	1.19918	0.23792
YBL063W	1.28603	0.242735	1.19906	0.0962488	KIP1	kinesin related protein
YDR476C	1.2597	0.18382	1.19882	0.293835
YOR377W	1.27087	0.00207373	1.19878	0.0361031	ATF1	Alcohol acetyltransferase
YIR024C	1.11566	0.133733	1.1987	0.108414	GIF1	(putative) involved in cell cycle control
YIL042C	0.897619	0.275081	1.19866	0.0960916
YAL065C-A	0.902407	0.774856	1.19843	0.574486
YDR290W	1.04358	0.784557	1.19828	0.474936
YJR047C	1.14217	0.442491	1.19774	0.19846	ANB1	anaerobically expressed form of translation initiation factor eIF-5A
YPL166W	1.02787	0.853502	1.1975	0.508697
YOL119C	1.50431	0.00336461	1.19732	0.363409
YOR118W	1.27869	0.0802794	1.19731	0.00575825
YJL066C	1.15044	0.139357	1.19725	0.00429163	MPM1
YOR176W	0.930829	0.361529	1.19657	0.0817781	HEM15	ferrochelatase (protoheme ferrolyase)
YOL001W	1.03643	0.188746	1.19655	0.267505	PHO80	The Pho80p Cyclin
YDR282C	0.954106	0.327852	1.19648	0.311272
YLR199C	1.09342	0.450177	1.19639	0.0623321
YDR386W	1.11669	0.264773	1.19624	0.310087	MUS81	involved in DNA repair, interacts with Rad54
YLR207W	0.897706	0.250598	1.19605	0.273711	HRD3	involved in HMG-CoA reductase degradation
YIL162W	1.09432	0.200356	1.19579	0.0151865	SUC2	invertase (sucrose hydrolyzing enzyme)
YFL003C	1.14009	0.145119	1.19562	0.139074	MSH4	meiosis specific protein, E.coli MutS protein, localizes to discrete sites on meiotic chromosomes
YGL122C	1.30286	0.0117285	1.19561	0.214899	NAB2	nuclear polyadenylated RNA binding protein
YDR243C	1.25885	0.137406	1.1956	0.194415	PRP28	RNA helicase
YLR460C	1.0765	0.0344548	1.19545	0.0919157
YOL073C	1.8072	0.326039	1.19539	0.610958
YNL045W	1.09391	0.699409	1.19526	0.391553
YJR011C	1.03397	0.640381	1.1952	0.0957065
YNL150W	1.47504	0.033299	1.19466	0.328226
YKL088W	1.09122	0.313881	1.19449	0.139871
YNL332W	1.17372	0.00433465	1.19439	0.0640305	THI12	Involved in pyrimidine biosynthesis
YOL116W	1.14483	0.00726479	1.19429	0.00297781	MSN1	43 kDa protein, transcriptional activator
YDL018C	1.10526	0.703636	1.19426	0.234926	ERP3	p24 protein involved in membrane trafficking
YFL055W	1.08846	0.134669	1.19419	0.018732	AGP3	Amino acid permease
YDR330W	0.959403	0.659507	1.19374	0.292666
YIL101C	1.23942	0.045641	1.19359	0.00119452	XBP1	transcriptional repressor
YJL022W	1.33638	0.00974317	1.19312	0.00785725
YJR042W	1.29854	0.283614	1.19302	0.00998112	NUP85	nuclear pore protein
YKL181W	0.782186	0.0277284	1.19273	0.437812	PRS1	ribose-phosphate pyrophosphokinase
YMR154C	1.26803	0.347537	1.1927	0.132325	RIM13	Cysteine protease similar to E. nidulans palB
YDR424C	1.44879	0.195357	1.19264	0.182528	DYN2	putative light chain of dynein
YDR273W	1.20893	0.0172205	1.19218	0.211392
YBR291C	1.19818	0.609993	1.19215	0.426139	CTP1	citrate tranporter in mitochondrial inner membrane
YNL041C	0.888173	0.522027	1.19174	0.179865
YOR077W	1.18646	0.33177	1.19174	0.130484	RTS2	similar to mouse KIN7 protein
YMR250W	1.01263	0.870138	1.19168	0.034191	GAD1	glutamate decarboxylase
YIL132C	1.1228	0.20953	1.19153	0.308965
YDR265W	1.68808	0.000489257	1.19145	0.247799	PEX10	C3HC4 zinc-binding integral peroxisomal membrane protein
YOR029W	1.03349	0.496077	1.19136	0.157068
YNL104C	1.69743	0.072877	1.19129	0.24555	LEU4	alpha-isopropylmalate synthase (2-Isopropylmalate Synthase)
YPR051W	1.03197	0.638284	1.19071	0.324897	MAK3	N-acetyltransferase
YFR015C	1.19487	0.406041	1.19014	0.100389	GSY1	Glycogen synthase (UDP-gluocse--starch glucosyltransferase)
YPL087W	1.53556	0.148441	1.18986	0.572177	YDC1	alkaline dihydroceramidase with minor reverse activity.
YMR228W	1.07468	0.12458	1.1897	0.269913	MTF1	Mitochondrial RNA polymerase specificity factor
YIL034C	0.972476	0.745439	1.1896	0.442736	CAP2	beta subunit of capping protein
YML069W	0.992497	0.943884	1.18938	0.237854	POB3	binds DNA polymerase delta
YML084W	1.08048	0.0706081	1.18898	0.0391753
YNL046W	1.19791	0.375565	1.1886	0.00673351
YDR193W	1.07728	0.535947	1.18783	0.413899
YDL197C	0.894197	0.147382	1.18772	0.196655	ASF2	Anti-silencing protein, involved in transcription
YDR315C	1.38925	0.0295758	1.18752	0.0683379	IPK1	inositol 1,3,4,5,6-pentakisphosphate 2-kinase (IP5 2-kinase)
YML094W	1.00628	0.985311	1.18743	0.245275	GIM5	bovine prefoldin subunit 5 homolog (putative)
YKL173W	0.949022	0.229393	1.18715	0.165668	SNU114	U5 snRNP-specific protein related to EF-2
YDL157C	0.971896	0.806623	1.18672	0.504002
YOR125C	1.23396	0.303727	1.1866	0.236034	CAT5	may encode a protein involved in one or more monoxygenase or hydroxylase steps of ubiquinone biosynthesis
YOR161C	1.12839	0.0811288	1.18655	0.0291315
YLR408C	1.07971	0.406862	1.18654	0.152887
YDR095C	1.00639	0.945205	1.18637	0.415858
YBL004W	1.00462	0.976423	1.18628	0.528091
YOR170W	1.05628	0.402986	1.1861	0.132575
YLR067C	0.829103	0.164638	1.18608	0.0439809	PET309	involved in COX1 mRNA stability
YCR011C	1.13776	0.0391341	1.18587	0.178802	ADP1	Active transport ATPase
YOR186W	1.20746	0.0110526	1.18579	0.0250005
YER029C	1.40666	0.00118705	1.18562	0.535363	SMB1	U1 snRNP protein
YDR007W	1.18444	0.404024	1.18558	0.460977	TRP1	n-(5'-phosphoribosyl)-anthranilate isomerase
YLR159W	0.971892	0.708045	1.18544	0.240579
YDR480W	1.11932	0.09321	1.18527	0.278723	DIG2	MAP kinase-associated protein
YPR177C	1.13039	0.0945422	1.18497	0.133067
YMR034C	1.34785	0.00965911	1.18446	0.000293362
YOR086C	0.999869	0.99856	1.18438	0.389367
YMR100W	1.03373	0.733342	1.18419	0.14811	MUB1	involved in bud site selection
YBL047C	1.28745	0.0916606	1.18418	0.0437199	EDE1	USO1 homolog (S. cerevisiae), cytoskeletal-related transport protein, Ca++ binding
YOL133W	1.0716	0.427207	1.18417	0.141493	HRT1	subunit of Skp1-Cullin-F-box ubiquitin protein ligase (SCF)
YPL256C	1.05398	0.42092	1.18406	0.195035	CLN2	G(sub)1 cyclin
YER089C	1.12688	0.0530903	1.18388	0.501738	PTC2	Protein phosphatase type 2C
YML087C	0.950159	0.673202	1.18386	0.509633
YPR170C	1.20438	0.0177287	1.18379	0.180007
YGR238C	1.29837	0.580555	1.18363	0.486623	KEL2	involved in cell fusion and morphology\; contains six Kelch repeats
YLR216C	1.11014	0.738527	1.18351	0.493623	CPR6	cyclophilin related to the mammalian CyP-40
YDL205C	0.890726	0.238152	1.18349	0.39532	HEM3	phorphobilinogen deaminase (uroporphyrinogen synthase), the third step in heme biosynthesis
YOR217W	0.96883	0.489168	1.18324	0.110216	RFC1	Subunit 1 of Replication Factor C\; homologous to human RFC 140 kDa subunit
YJL090C	0.958112	0.623796	1.18315	0.220724	DPB11	DNA polymerase II complex
YEL044W	0.955546	0.335906	1.18309	0.301552
YLR331C	1.17617	0.00230219	1.18303	0.0551016
YGL262W	1.16179	0.0670659	1.18295	0.00900246
YMR037C	1.0459	0.515402	1.18293	0.00167395	MSN2	zinc finger protein
YOR005C	1.05034	0.433849	1.18265	0.0708286	DNL4	ATP dependent DNA ligase
YBR195C	1.01751	0.791679	1.18258	0.338838	MSI1	p50 subunit of the yeast omatin Assembly Factor-I (CAF-I) negative regulator of ras-mediated cAMP induction\; homologous to beta subunit of GTP-binding proteins
YER082C	0.900744	0.36096	1.18247	0.234566	KRE31
YBR199W	1.02703	0.741744	1.18235	0.247739	KTR4	Putative alpha-1,2-mannosyltransferase
YJR096W	1.49018	0.009061	1.1823	0.0280285
YGR178C	1.07846	0.338743	1.18202	0.392646	PBP1	interacts with poly(A)-binding protein
YGL206C	1.15261	0.342809	1.18201	0.167607	CHC1	presumed vesicle coat protein
YHR017W	1.23073	0.164407	1.18143	0.371796	YSC83	similar to S. douglasii YSD83
YOR123C	1.12198	0.410889	1.18111	0.144884	LEO1
YPR199C	1.69068	0.205308	1.18101	0.511695	ARR1	Putative transcription factor involved in arsenite and arsenate resistance
YDL162C	1.08005	0.0602717	1.18099	0.351753
YGL045W	1.2296	0.0193335	1.18091	0.0691344
YGR116W	0.987814	0.754732	1.1805	0.142844	SPT6	transcriptional regulator, interacts with histones, primarily histone H3, possesses nucleosome assembly activity
YOR264W	2.12764	0.000767214	1.18017	0.102338
YOR336W	1.14222	0.199456	1.18014	0.544297	KRE5	involved in cell wall biogenesis
YGL004C	0.955291	0.64645	1.18004	0.286919
YNR040W	0.953836	0.582821	1.1799	0.512874
YGR230W	1.27197	0.270147	1.17985	0.0108815	BNS1	similar to Spo12, involved in sporulation
YPL064C	1.02263	0.541214	1.17961	0.33908
YPL110C	0.912143	0.117432	1.1794	0.330523
YDR334W	1.04525	0.156386	1.17938	0.366464	SWR1	DEAH-box protein, putative RNA helicase
YLL056C	1.09377	0.55597	1.17937	0.559696
YHR152W	1.05773	0.511952	1.17906	0.245172	SPO12	20 kDa protein with negatively charged C-terminus required for function\; thought to be a positive regulator of exit from M-phase in mitosis and meiosis. Spo12p interacts with Dbf2p and Dbf20p protein kinases.
YGL011C	1.26281	0.521594	1.17904	0.230735	SCL1	Proteasome subunit YC7alpha\/Y8 (protease yscE subunit 7)
YJL187C	1.13443	0.0271818	1.17871	0.042547	SWE1	protein kinase homolog
YLR071C	1.07683	0.46505	1.17848	0.240378	RGR1	component of RNA polymerase II holoenzyme\/mediator complex, interacts with Sin4p, Gal11p, and a 50 kd polypeptide
YKL098W	1.0797	0.162273	1.17847	0.141092
YIL051C	1.44719	0.00722516	1.178	0.35791	MMD1	Maintenance of Mitochondrial DNA 1
YMR031C	1.19584	0.0149539	1.17799	0.159594
YMR050C	1.32184	0.113834	1.17791	0.0113029		TyB Gag-Pol protein. Gag processing produces capsid proteins. Pol is cleaved to produce protease, reverse transcriptase and integrase activities.
YIL005W	1.38295	0.347363	1.17726	0.210771
YIR022W	1.26097	0.246001	1.17711	0.368773	SEC11	signal peptidase subunit
YPL173W	0.989863	0.965923	1.17653	0.379363	MRPL40	Mitochondrial ribosomal protein MRPL40 (YmL40)
YHR139C	1.3034	0.0145216	1.17616	0.112743	SPS100	sporulation-specific wall maturation protein
YER189W	1.18176	0.052118	1.17616	0.422436
YIL031W	0.992997	0.956785	1.17615	0.268843	ULP2
YPR175W	1.0001	0.999157	1.17613	0.107036	DPB2	DNA polymerase epsilon, subunit B
YDR115W	1.34792	0.0198021	1.17602	0.201748
YJL148W	0.629664	0.0625495	1.17579	0.545829	RPA34	unshared RNA polymerase I subunit
YKL039W	0.948433	0.301769	1.17579	0.145332	PTM1	Putative membrane protein
YLR010C	1.23381	0.198268	1.1756	0.00671196
YKL137W	1.06059	0.69127	1.17549	0.24422
YML083C	0.910759	0.0170326	1.1754	0.278342
YPR031W	1.14239	0.243987	1.17537	0.422195
YLL021W	1.04306	0.402861	1.17464	0.186509	SPA2	spindle pole antigen
YDR143C	0.987042	0.772911	1.17464	0.4262	SAN1	(putative) transcriptional regulator
YOR064C	1.31823	0.010195	1.17455	0.243816	YNG1	histone acetyltransferase complex component
YIL126W	1.11642	0.293511	1.17448	0.235007	STH1	helicase related protein, snf2 homolog
YPR025C	1.26694	0.086852	1.17441	0.113048	CCL1	novel cyclin gene\; encodes subunits of TFIIK, a subcomplex of transcription factor TFIIH
YPR040W	1.40898	0.050509	1.17424	0.296934
YBL107C	1.07471	0.575203	1.1742	0.174155
YIL153W	1.20217	0.0992247	1.1741	0.0427937	RRD1	Resistant to Rapamycin Deletion
YBL018C	1.03755	0.611887	1.17401	0.362333	POP8	integral subunit of RNase P and apparent subunit of RNase MRP
YPL141C	1.07801	0.0425385	1.17322	0.0265464
YNL122C	1.06687	0.615149	1.17322	0.1443
YLR073C	0.981704	0.844314	1.17313	0.235918
YLR228C	0.983432	0.917797	1.17306	0.325033	ECM22	involved in cell wall biogenesis (putative)
YPR196W	1.21496	0.00701857	1.17262	0.22499
YDR284C	0.853628	0.180119	1.1726	0.436724	DPP1	Diacylglycerol Pyrophosphate Phosphatase
YMR219W	0.960515	0.116434	1.17239	0.215487	ESC1	involved in silencing
YNL273W	0.940762	0.139157	1.17221	0.294474	TOF1	Interacts with topoisomerase I
YDR074W	1.21149	0.041057	1.17213	0.074792	TPS2	Trehalose-6-phosphate phosphatase
YMR061W	1.09751	0.402784	1.17203	0.106354	RNA14	component of the cleavage and polyadenylation factor CF I involved in pre-mRNA 3'-end processing
YBL079W	0.999967	0.999693	1.17193	0.473266	NUP170	Nucleoporin highly similar to Nup157p and to mammalian Nup155p (nup170 mutant can be complemented with NUP155)
YPL200W	1.1231	0.476521	1.17097	0.0484437
YKL016C	0.993233	0.942649	1.17093	0.399641	ATP7	ATP synthase d subunit
YMR265C	0.957057	0.469667	1.17088	0.280072
YML127W	0.849857	0.0921051	1.17061	0.238664
YDL012C	0.983378	0.762512	1.17054	0.428983
YKL160W	1.05525	0.500314	1.17032	0.450191
YGL250W	1.47094	0.114504	1.17031	0.0105852
YBR278W	1.21329	0.560759	1.17013	0.350167	DPB3	C and C' subunits of DNA polymerase II
YOR231W	0.95944	0.696472	1.17013	0.487775	MKK1	protein kinase involved in protein kinase C pathway
YOR055W	1.38617	0.00118195	1.16976	0.00687782
YLR223C	0.976934	0.823336	1.16972	0.5127	IFH1	has a weak RNA-dependent ATPase activity which is not specific for rRNA
YOR139C	0.99624	0.935367	1.16969	0.00323522
YLR364W	1.00006	0.998669	1.16921	0.320519
YNL183C	0.911108	0.607528	1.16913	0.54527	NPR1	protein kinase homolog
YLR458W	1.20221	0.375384	1.16908	0.309622
YMR267W	1.13369	0.17904	1.16878	0.0224801	PPA2	mitochondrial inorganic pyrophosphatase
YMR216C	1.34478	0.00634562	1.16872	0.345913	SKY1	Serine Protein Kinase
YML032C	0.931705	0.0502218	1.16868	0.139915	RAD52	Required for X-ray damage repair and various types of intra-and interchromosomal mitotic recombination, including HO switching and plasmid exchange. Dispensable for premeiotic DNA synthesis, double strand breaks, synaptonemal complexes, and heteroduplex formation, but generally required for completion of meiotic recombination. RAD52 controls the level of a 72 kd endo-exonuclease in log phase and …
YFR018C	0.966419	0.719313	1.16843	0.63356
YKR051W	1.29798	0.00382147	1.16833	0.0415443
YOL050C	1.21671	0.177248	1.1683	0.013193
YMR184W	0.912761	0.556434	1.1683	0.599344
YNL176C	1.06639	0.666771	1.16804	0.0017049
YOR387C	1.3468	0.0682841	1.16801	0.00952523
YLR165C	1.15205	0.220288	1.16782	0.0726097	PUS5
YDL137W	1.22436	0.691324	1.16754	0.598036	ARF2	ADP-ribosylation factor 2
YBR037C	0.94241	0.831798	1.16749	0.346596	SCO1	inner mitochondrial membrane protein
YOL011W	0.947249	0.622688	1.16728	0.626424	PLB3	phospholipase B\/lysophospholipase
YMR092C	1.08097	0.219677	1.16723	0.108589	AIP1	actin cortical patch component
YJL077C	1.10715	0.0969331	1.16721	0.24104	ICS3	Increased Copper Sensitivity
YJL173C	1.3661	0.0302548	1.16694	0.327551	RFA3	subunit 3 of replication factor-A
YNL172W	1.09443	0.068063	1.16691	0.398678	APC1	subunit of ubiquitin- protein ligase
YNR045W	1.18289	0.035379	1.16681	0.0737175	PET494	translational activator of cytochrome c oxidase
YOL016C	1.87439	0.0696976	1.16652	0.040587	CMK2	Calmodulin-dependent protein kinase
YNL005C	1.4345	0.0486774	1.16616	0.373867	MRP7	Mitochondrial ribosomal protein MRP7 (YmL2) (E. coli L27)
YPL039W	1.13282	0.181191	1.1661	0.0333034
YGR110W	1.48078	0.176696	1.16598	0.146618
YMR086W	1.22081	0.0959802	1.16595	0.323735
YLR038C	0.977456	0.873976	1.16589	0.0251907	COX12	subunit VIb of cytochrome c oxidase
YNL144C	1.41976	0.000467812	1.16585	0.552513
YDR529C	1.26405	0.114824	1.16578	0.0152265	QCR7	ubiquinol-cytochrome c oxidoreductase subunit 7 (14 kDa)
YDR401W	0.995486	0.909558	1.16567	0.0376643
YER174C	1.02107	0.86922	1.16552	0.384356	GRX4	Protein with glutaredoxin activity
YLR437C	1.40027	0.0566076	1.1655	0.544132
YER015W	1.20153	0.0597395	1.16545	0.150483	FAA2	Acyl-CoA synthetase (fatty acid activator 2)
YDR505C	1.09169	0.0355821	1.16528	0.0225543	PSP1	high-copy suppressor of cdc17 DNA polymerase alpha mutations
YFL018C	1.04452	0.196043	1.16507	0.478066	LPD1	dihydrolipoamide dehydrogenase precursor (mature protein is the E3 component of alpha-ketoacid dehydrogenase complexes)
YDL144C	0.98009	0.89518	1.16504	0.497502
YPR133C	1.24287	0.415955	1.16483	0.0616986
YIL049W	1.31933	0.0402027	1.16466	0.278812	DFG10	involved in filamentous growth
YMR316C-B	1.05204	0.440315	1.16459	0.285473
YNL011C	1.39903	0.0301733	1.16411	0.191173
YFR020W	0.994156	0.961098	1.16402	0.447325
YLR211C	1.03035	0.722685	1.16397	0.0160891
YNL087W	1.03142	0.715912	1.16381	0.232937
YLR236C	0.99774	0.891884	1.16381	0.0340422
YIL082W	1.28761	0.278404	1.16377	0.400281
YOL095C	0.956862	0.636538	1.16377	0.222517	HMI1	mitochondrial DNA helicase (putative)
YFL052W	1.49385	0.0731255	1.16363	0.056418
YNL233W	0.9035	0.448275	1.16355	0.535002	BNI4	Is required to link Chs3p and Chs4p to the septins
YGR044C	1.12333	0.297906	1.1635	0.355165	RME1	zinc finger protein\; negative regulator of meiosis\; directly repressed by a1-a2 regulator
YIL109C	1.09194	0.441862	1.16335	0.0510427	SEC24	vesicle coat component
YIL174W	1.16298	0.0672658	1.163	0.450983
YNL084C	1.19345	0.443519	1.16287	0.0315038	END3	Required for endocytosis and organization of the cytoskeleton
YPL167C	1.00262	0.986496	1.16287	0.515604	REV3	DNA polymerase zeta subunit
YMR310C	0.868154	0.0466281	1.16287	0.431468
YAR028W	1.36997	0.0201126	1.16258	0.536474		membrane protein
YKL090W	1.13841	0.548226	1.16232	0.341864
YJR078W	1.23051	0.00718986	1.16217	0.0531414
YFL056C	1.28704	0.0379672	1.16208	0.0350273	AAD6	Hypothetical aryl-alcohol dehydrogenase (AAD)
YOL006C	1.04133	0.444472	1.16165	0.172069	TOP1	topoisomerase I
YNL152W	1.22654	0.00692808	1.1616	0.00139219
YMR155W	1.3769	0.0340143	1.16147	0.102867
YDL021W	1.0148	0.849488	1.16102	0.384718	GPM2	phosphoglycerate mutase, involved in glycolysis
YDR009W	1.18157	0.511235	1.16096	0.329754	GAL3	involved in galactose induction of GAL genes
YCR098C	1.04727	0.603526	1.16087	0.439559	GIT1	permease involved in the uptake of glycerophosphoinositol (GroPIns)
YER093C-A	1.09943	0.0457977	1.1608	0.427533
YLR219W	0.955499	0.66723	1.16056	0.230059	MSC3
YHR177W	1.08798	0.196606	1.16044	0.0529465
YPL262W	1.05302	0.618688	1.16041	0.109377	FUM1	mitochondrial and cytoplasmic fumarase (fumarate hydralase)
YKL052C	0.953738	0.731793	1.16028	0.497287	ASK1
YAR003W	0.88734	0.594897	1.1602	0.674754		beta transducin domain
YJL049W	1.02067	0.648435	1.15982	0.0262591
YPL038W	1.01511	0.872105	1.15965	0.411081	MET31	zinc finger DNA binding factor, transcriptional regulator of sulfur amino acid metabolism, highly homologous to Met32p
YNL071W	0.981336	0.913801	1.15957	0.489056	LAT1	Dihydrolipoamide acetyltransferase component (E2) of pyruvate dehydrogenase complex
YLR205C	1.58886	0.0280083	1.15953	0.029837
YLR182W	1.46455	0.409132	1.15934	0.409829	SWI6	transcription factor
YKL190W	0.991775	0.945138	1.15922	0.417497	CNB1	Type 2B protein phosphatase\; regulatory B subunit of calcineurin
YFL013C	1.21347	0.0727481	1.15917	0.00629248	IES1
YJR117W	1.14172	0.0331447	1.15899	0.159697	STE24	zinc metallo-protease that catalyzes the first step of N-terminal processing of the yeast a-factor precursor
YJL199C	1.00766	0.853249	1.15896	0.3636
YKL005C	0.92826	0.502064	1.15848	0.547462
YBR128C	1.68645	3.62764e-05	1.15827	0.552042	APG14	involved in autophagy
YHR150W	1.12136	0.402828	1.15822	0.205161
YKL215C	0.995507	0.948422	1.15816	0.0335007
YBL074C	0.860615	0.209037	1.15814	0.606191	AAR2	MATa1-mRNA splicing factor
YBL084C	1.16605	0.160912	1.15801	0.00256158	CDC27	component of the anaphase-promoting complex
YOR177C	1.04403	0.769871	1.15781	0.594741
YLR037C	0.868018	0.121728	1.15752	0.562831
YGR213C	1.06813	0.0796157	1.15747	0.375684	RTA1	involved in 7-aminocholesterol resistance
YOL106W	1.24767	0.198011	1.15735	0.252461
YHL022C	1.24827	0.0361429	1.15723	0.423629	SPO11	Encodes one of the earliest meiosis-specific recombination functions.
YFL036W	0.972002	0.81692	1.15718	0.468573	RPO41	mitohcondrial RNA polymerase
YDR288W	1.02545	0.842424	1.15712	0.221007
YPR071W	1.06772	0.501811	1.15712	0.216469
YLR277C	1.03929	0.798688	1.15705	0.608327	YSH1	subunit of Polyadenylation factor I (PF I)
YKL164C	0.692163	0.00596005	1.15703	0.49356	PIR1	Protein containing tandem internal repeats
YDL009C	1.25817	0.414955	1.15702	0.0399602
YPL192C	0.965161	0.816103	1.15671	0.291834	PRM3	pheromone-regulated membrane protein
YCL036W	0.995583	0.983397	1.15628	0.766372
YER139C	1.15658	0.258563	1.15585	0.431035
YLR229C	0.84775	0.016195	1.15572	0.367313	CDC42	member of the Rho subfamily of Ras-like proteins
YBL029W	1.07392	0.77957	1.15559	0.585211
YLR317W	0.872852	0.460932	1.15553	0.663549	KRE34
YJL198W	0.986024	0.923456	1.15515	0.465219
YMR254C	1.341	0.00371315	1.15514	0.0683821
YLR456W	0.948176	0.420381	1.15513	0.111204
YGL006W	1.15546	0.0321711	1.15503	0.241299	PMC1	putative vacuolar Ca2+ ATPase
YDR127W	0.990773	0.953173	1.15482	0.202119	ARO1	pentafunctional arom polypeptide (contains: 3-dehydroquinate synthase, 3-dehydroquinate dehydratase (3-dehydroquinase), shikimate 5-dehydrogenase, shikimate kinase, and epsp synthase)
YLR152C	1.13175	0.480851	1.15475	0.127229
YPR117W	1.15032	0.362755	1.15468	0.44551
YGR076C	1.03286	0.879376	1.15455	0.380798	MRPL25	Mitochondrial ribosomal protein MRPL25 (YmL25)
YMR264W	1.09324	0.0750271	1.15435	0.313377	CUE1	Ubc7p binding and recruitment protein
YOR002W	1.12977	0.508233	1.15366	0.562195	ALG6	glucosyltransferase
YAR068W	0.97391	0.675831	1.15358	0.363379		Potential membrane protein
YCR046C	1.15318	0.662966	1.15343	0.715297	IMG1	mitochondrial ribosomal protein
YCR045C	0.98799	0.974177	1.15326	0.594925		Protease
YLR171W	0.916276	0.341761	1.15299	0.256815
YKR048C	1.24698	0.351276	1.15299	0.302528	NAP1	nucleosome assembly protein I
YGL249W	1.1986	0.044014	1.15296	0.294578	ZIP2	involved in meiotic recombination and disjunction
YCL041C	1.15303	0.510363	1.15288	0.599231
YML078W	1.05046	0.385417	1.15287	0.206736	CPR3	cyclophilin-3 (cyclosporin-sensitive proline rotamase-3)
YNL212W	1.1968	0.182212	1.15283	0.0707722	VID27	vacuole import and degradation
YLR031W	0.944618	0.441936	1.15271	0.611142
YKL092C	1.06375	0.504993	1.1526	0.401445	BUD2	GTPase-activating protein (GAP) for Rsr1p\/Bud1p
YMR065W	1.00894	0.914948	1.15256	0.20398	KAR5	coiled-coil membrane protein
YPL161C	1.04439	0.306954	1.15251	0.00981467	BEM4	Involved in polarity establishment and bud emergence
YER123W	1.05972	0.399593	1.1524	0.23292	YCK3	plasma membrane-bound casein kinase I homolog
YOR140W	1.06113	0.390625	1.1524	0.00658064	SFL1	Transcription factor
YJR027W	1.17748	0.00205783	1.15239	0.205047
YCL034W	1.40628	0.121847	1.15227	0.441036
YKL157W	1.07498	0.263085	1.15223	0.0577015	APE2	aminopeptidase yscII
YKR062W	1.23997	0.238087	1.15213	0.358193	TFA2	Small subunit of TFIIE transcription factor
YBR243C	1.00335	0.978974	1.15171	0.383067	ALG7	UDP-N-acetyl-glucosamine-1-P transferase (GPT)
YKL123W	1.07736	0.0307413	1.1515	0.00396376
YNL198C	0.866169	0.0346243	1.15144	0.196968
YNR050C	1.1284	0.0191017	1.15109	0.0318875	LYS9	Saccharopine dehydrogenase (NADP+, L-glutamate forming) (saccharopine reductase) (EC 1.5.1.10)
YER184C	1.10258	0.16853	1.15096	0.277692
YNL097C	1.24897	0.188815	1.1509	0.223398	PHO23	Involved in expression of PHO5
YGR273C	1.04157	0.752731	1.15081	0.392705
YER100W	1.10634	0.681832	1.15075	0.440662	UBC6	ubiquitin-conjugating enzyme
YDL183C	1.07263	0.518393	1.15063	0.296667
YDR201W	1.06802	0.799265	1.15056	0.118222	SPC19	component of spindle pole
YPL264C	1.04308	0.632763	1.15052	0.326283
YKR089C	1.0694	0.489148	1.15036	0.134588
YOR065W	1.17514	0.0989372	1.15018	0.118917	CYT1	Cytochrome c1
YOR314W	1.01538	0.666832	1.15016	0.0644938
YIL105C	1.09613	0.372037	1.15	0.173544
YOR341W	1.02438	0.491535	1.14979	0.0288376	RPA190	RNA polymerase I subunit 190 (alpha)
YPL164C	1.01613	0.473775	1.14977	0.525306	MLH3	MutL Homolog
YPL283C	0.958211	0.250323	1.1497	0.177258	YRF1-7	Y'-helicase protein 1
YIL028W	0.966659	0.59854	1.14969	0.404562
YDR494W	1.20625	0.218344	1.14927	0.3422
YPR036W	1.00754	0.980235	1.14901	0.303319	VMA13	vacuolar ATPase V1 domain subunit H (54 kDa)
YDR295C	1.10367	0.16474	1.14896	0.361987	PLO2	Ploidy-related
YIR029W	1.26169	0.025268	1.14852	0.226342	DAL2	allantoicase
YKL188C	0.956468	0.738337	1.14823	0.0295463	PXA2	peroxisomal ABC transporter 2
YDR189W	1.08679	0.584074	1.14781	0.102921	SLY1	SNARE docking complex subunit
YDR286C	1.01506	0.880908	1.14756	0.383591
YOR370C	0.945006	0.381436	1.14714	0.470268	MRS6	Rab geranylgeranyltransferase regulatory subunit
YPR109W	1.33934	0.00163419	1.14707	0.0894558
YER170W	1.23815	0.113687	1.14691	0.0522214	ADK2	Adenylate kinase (mitochondrial GTP:AMP phosphotransferase)
YPL243W	1.10337	0.0527893	1.14677	0.0563537	SRP68	component of signal recognition particle
YKR055W	1.22052	0.225582	1.14635	0.0780006	RHO4	ras homolog--GTP binding protein
YJR161C	1.1242	0.277036	1.14612	0.50542	COS5	Protein with similarity to members of the Ybr302p\/Ycr007p\/Cos8p\/Cos9p family, coded from subtelomeric region
YHR034C	1.02298	0.646362	1.14612	0.0364594
YGR289C	1.04477	0.247013	1.14607	0.0371635	MAL11	Alpha-glucoside transporter\; maltose permease
YDL072C	1.22232	0.0104665	1.14537	0.305057
YML003W	1.045	0.669713	1.14529	0.142039
YHR059W	1.07791	0.0923464	1.1452	0.09215	FYV4
YGL093W	0.842034	0.247116	1.14516	0.480136	SPC105	component of spindle pole
YML037C	1.09414	0.0764885	1.14499	0.0259663
YBR129C	1.20655	0.291122	1.14475	0.107612	OPY1	involved in mating pathway
YLR007W	1.00663	0.910228	1.14445	0.209191
YGR147C	1.46199	0.00981651	1.14441	0.495977	NAT2	N alpha-acetyltransferase that acts on methionine termini
YOR338W	1.45744	0.228421	1.14432	0.363187
YPL066W	1.30607	0.0414139	1.14423	0.17084
YJL059W	1.10171	0.215462	1.1441	0.156295	YHC3	Homolog of human CLN3
YLL005C	1.05543	0.434188	1.14394	0.08201
YOR014W	1.0723	0.0313428	1.14384	0.0965181	RTS1	B-type regulatory subunit of protein phosphatase 2A (PP2A)
YMR063W	1.01888	0.374561	1.14371	0.0575508	RIM9	involved in sporulation
YMR086C-A	1.15476	0.0572297	1.1435	0.00128927
YLL033W	0.959313	0.495855	1.14324	0.172921
YDL005C	1.22964	0.501064	1.14317	0.314622	MED2	Stoichiometric member of mediator complex
YCR093W	0.991978	0.901126	1.1429	0.599248	CDC39	nuclear protein that negatively regulates basal transcription
YHR061C	0.985274	0.730776	1.14285	0.2576	GIC1	interacts with GTPase, involved in bud emergence
YDR129C	1.4655	0.017012	1.14235	0.483604	SAC6	fibrim homolog (actin-filament bundling protein)
YLR286C	1.00733	0.956619	1.14219	0.395839	CTS1	Endochitinase
YDR005C	1.32423	0.374909	1.14219	0.476564	MAF1	Mod5 protein sorting
YJL147C	1.06467	0.219135	1.14217	0.433487
YJR115W	1.07069	0.293728	1.14214	0.340103
YDL195W	0.871418	0.273507	1.14212	0.210744	SEC31	Component (p150) of COPII coat of secretory pathway vesicles
YLR305C	0.974287	0.745721	1.142	0.0503606	STT4	encodes a phosphatidylinositol-4-kinase, homologous to VPC34
YGR045C	1.11422	0.0221102	1.14185	0.0330526
YHR210C	1.02756	0.834913	1.14125	0.503515		UDP-glucose-4-epimerase (GAL10, galE)
YCR040W	0.999996	0.999981	1.14121	0.697753	MATALPHA1	transcription factor involved in the regulation of alpha-specific genes
YNL038W	0.888767	0.120077	1.14109	0.480808	GPI15
YLR218C	1.07224	0.020229	1.14074	0.0238801
YAL022C	1.03647	0.817194	1.14069	0.757075	FUN26	predicted membrane protein
YNL063W	1.07479	0.613329	1.14057	0.352792
YIR010W	1.33625	0.192258	1.1402	0.247899
YPL247C	1.30477	0.00713344	1.13977	0.210044
YMR087W	1.17353	0.0821388	1.13962	0.0698911
YLL009C	1.03037	0.694625	1.13939	0.184351	COX17	cysteine-rich cytoplasmic protein
YLR054C	1.08866	0.176779	1.13937	0.165617
YGR269W	0.891873	0.309374	1.13919	0.468029
YKL015W	1.06078	0.496869	1.13899	0.00447485	PUT3	zinc-finger transcription factor of the Zn(2)-Cys(6) binuclear cluster domain type
YCLX02C	1.13094	0.192835	1.13891	0.0484391
YLR116W	1.22752	0.158685	1.13845	0.186414	MSL5	Branchpoint bridging protein
YIL158W	1.15842	0.659036	1.13837	0.507013
YHR067W	0.922607	0.451605	1.13826	0.456431
YOR249C	1.07021	0.242722	1.13777	0.110385	APC5	subunit of the anaphase promoting complex
YDL022W	0.971455	0.814883	1.13776	0.265438	GPD1	glycerol-3-phosphate dehydrogenase
YPR026W	1.0038	0.932895	1.13738	0.0116625	ATH1	Acid trehalase
YPR125W	1.00998	0.885274	1.13723	0.549731
YLL048C	0.992449	0.742603	1.1372	0.332158	YBT1	bile acid transporter of ABC family
YDR521W	1.09422	0.25966	1.13708	0.077507
YIR011C	1.65862	0.0386874	1.13693	0.616204	STS1	(putative) involved in control rRNA stability and protein transport
YNL206C	1.04258	0.474988	1.1369	0.193556	RTT106	Regulator of Ty1 Transposition - same phenotype as RTT101 - RTT105, disruption causes increase in Ty1 transposition. Isolated from the same screen as the other named RTT genes.
YBR147W	1.66595	0.352961	1.13686	0.496711
YOR114W	1.18837	0.0179714	1.1367	0.0217127
YOL003C	0.950052	0.639555	1.13662	0.426115
YMR073C	1.15012	0.182282	1.1365	0.0776837
YJR071W	1.0651	0.0536915	1.13613	0.369186
YLR156W	1.18206	0.00306767	1.1361	0.211935
YOR010C	1.12547	0.0541553	1.1359	0.117584	TIR2	induced by cold shock
YIL122W	1.05857	0.32894	1.13587	0.265745
YJR086W	1.25976	0.00216334	1.13583	0.31624	STE18	gamma subunit of G protein coupled to mating factor receptors
YGL160W	1.18696	0.0551347	1.13579	0.184101
YEL039C	1.03076	0.591513	1.13567	0.0476256	CYC7	iso-2-cytochrome c
YHL026C	1.01099	0.67805	1.13566	0.453638
YOR152C	1.27759	0.00935832	1.13563	0.197248
YHR016C	1.07593	0.671429	1.13548	0.176213	YSC84	SH3 domain in C-terminus
YJR146W	1.39146	0.0504072	1.13545	0.0268485
YLR281C	1.06008	0.209781	1.13537	0.0294504
YMR117C	1.09744	0.0435175	1.13516	0.0233887	SPC24	component of spindle pole
YJL110C	0.933158	0.240648	1.13507	0.143552	GZF3	GATA zinc finger protein 3 homologous to Dal80 in structure and function
YAL031C	1.06333	0.755862	1.13501	0.426484	FUN21	FUN21
YNR059W	1.12777	0.046199	1.1347	0.0335097	MNT4	mannosyltransferase (putative)
YBR049C	1.23241	0.350812	1.13461	0.11186	REB1	RNA polymerase I enhancer binding protein
YMR247C	0.990822	0.412976	1.13458	0.328401
YJL141C	1.05771	0.524911	1.13449	0.323871	YAK1	Serine-threonine protein kinase
YOR087W	0.895841	0.448549	1.13447	0.237519
YBR109C	1.06354	0.668227	1.13447	0.330343	CMD1	Calmodulin
YLR280C	1.01529	0.813991	1.13433	0.00538524
YLR273C	1.05472	0.410672	1.13419	0.421677	PIG1	Protein similar to Gac1p, a putative type 1 protein phosphatase targeting subunit
YGL190C	1.14633	0.292436	1.13408	0.015554	CDC55	Protein phosphatase 2A regulatory subunit B
YAR060C	1.23981	0.0280302	1.13402	0.115815
YNL008C	1.07007	0.183304	1.13391	0.0309321
YDR411C	1.25142	0.0164855	1.13387	0.0356505
YMR026C	1.26267	0.0651071	1.13362	0.411467	PEX12	C3HC4 zinc-binding integral peroxisomal membrane protein
YMR204C	1.0668	0.199394	1.13345	0.298182
YJL217W	0.868356	0.0244575	1.1334	0.481227
YBR294W	1.01726	0.916544	1.13307	0.677172	SUL1	Probable sulfate transport protein
YPL102C	1.20082	0.1664	1.13282	0.142345	KRE24
YOR347C	1.09835	0.363392	1.13281	0.578599	PYK2	pyruvate kinase
YDL149W	0.888003	0.381246	1.13272	0.377463	APG9	Integral membrane protein
YNL319W	0.996094	0.967952	1.13253	0.277862
YLR120C	1.4289	0.33909	1.13249	0.422747	YPS1	GPI-anchored aspartic protease
YLR360W	1.02354	0.889156	1.13243	0.295148	VPS38	involved in vacuolar protein targeting
YDR467C	1.14217	0.209711	1.13235	0.216405
YML081W	0.867695	0.0720646	1.13228	0.276959
YDL053C	1.18556	0.74288	1.13227	0.720901
YMR029C	1.54909	0.0159845	1.13217	0.139459
YLR275W	1.19562	0.112604	1.13211	0.222775	SMD2	U1 snRNP protein of the Sm class
YLR392C	1.02577	0.715594	1.13204	0.0831289
YPL215W	1.00288	0.984933	1.1318	0.550682	CBP3	involved in cytochrome-c reductase assembly
YOL132W	1.13923	0.265618	1.13171	0.0603735
YGL201C	1.09778	0.147638	1.13164	0.327012	MCM6	component of MCM initiator complex involved in DNA replication
YIL007C	1.22102	0.401975	1.13159	0.188477
YKR065C	1.06388	0.643886	1.13154	0.296571
YGL095C	0.941233	0.553238	1.13146	0.155959	VPS45	cytosolic and peripheral membrane protein
YOR225W	1.01273	0.943029	1.13138	0.557221
YIL130W	1.03062	0.457176	1.13135	0.428684
YDR130C	1.03849	0.252356	1.13123	0.108265	FIN1	Cell cycle-dependent filament between nuclei
YPR192W	1.01542	0.86005	1.13109	0.219103	AQY1	Aquaporin
YLL061W	1.04407	0.027913	1.13105	0.00703031	MMP1	High affinity S-methylmethionine permease
YMR163C	0.976864	0.287824	1.13101	0.0915721
YJL084C	0.821012	0.259898	1.1306	0.0479583
YDL173W	1.87101	0.0783962	1.13017	0.0360586
YGR002C	1.11668	0.0114856	1.12992	0.0627321
YDR103W	1.13343	0.446437	1.12971	0.576738	STE5	scaffold protein for MAP kinase cascade
YOR028C	1.03187	0.495968	1.12966	0.0794874	CIN5	bZIP protein, can activate transcription from a promoter containing a Yap recognition site
YPL148C	1.02966	0.392895	1.12964	0.0376143	PPT2	Phosphopantetheine:protein transferase (PPTase)
YBL065W	1.0787	0.834145	1.12959	0.679348
YDL132W	0.962254	0.623038	1.12958	0.382343	CDC53	involved in G1 cyclin degradation
YFL012W	1.06592	0.226525	1.12958	0.087819
YLL029W	1.19106	0.0369944	1.12952	0.0756641
YER127W	0.995302	0.978013	1.12943	0.416175	LCP5	involved in ribosomal RNA processing
YNL240C	1.50002	0.248656	1.12922	0.489923	NAR1	Nuclear architecture related protein with homology to human Narf (Nuclear prelamin A Recognition Factor)
YGR032W	0.949581	0.545848	1.12921	0.524761	GSC2	catalytic component of 1,3-beta-D-glucan synthase
YDR501W	1.06324	0.450945	1.12918	0.166733	PLM2	PLasmid Maintenance
YBR057C	1.15285	0.639998	1.12911	0.193976	MUM2	similar to ubiquitin C-terminal hydrolase, involved in meiosis
YKL115C	1.13694	0.182545	1.1291	0.330708
YML029W	1.29734	0.0436897	1.1291	0.206095
YKR047W	1.08671	0.113496	1.1286	0.0708596
YPL169C	1.00056	0.997403	1.12849	0.592286	MEX67	a poly(A)+RNA binding protein
YBL104C	1.23282	0.272408	1.12847	0.432694
YOL008W	0.98751	0.929097	1.12822	0.483542
YKL045W	1.01717	0.770496	1.12789	0.242679	PRI2	p58 polypeptide of DNA primase
YMR278W	1.0401	0.524325	1.12787	0.012215
YOR351C	1.10793	0.0950778	1.12786	0.00713493	MEK1	mRNA is induced in meiosis, encodes a meiosis-specific serine\/threonine protein kinase which interacts with and is believed to phosphorylate Hop1p
YLR428C	1.10269	0.391688	1.12785	0.16947
YJL043W	1.1326	0.242929	1.12751	0.0256571
YMR005W	0.974598	0.929835	1.12741	0.828934	MPT1	involved in protein synthesis
YDR336W	1.06224	0.69049	1.12737	0.388966
YMR274C	1.05494	0.162968	1.12729	0.541995	RCE1	protease, acts on Ras and a-factor C-termini
YMR223W	1.0047	0.975709	1.12702	0.482032	UBP8	putative deubiquitinating enzyme
YDR373W	1.02239	0.87639	1.127	0.614319	FRQ1
YGL149W	0.90502	0.161433	1.12695	0.496293
YKL192C	0.99481	0.959252	1.12688	0.559294	ACP1	mitochondrial acyl carrier protein
YPL139C	1.21654	0.0229064	1.12684	0.297907	UME1	Transcriptional modulator
YMR318C	0.826032	0.186358	1.12648	0.582449
YDR289C	1.25215	0.249738	1.12636	0.137752	RTT103	regulator of Ty1 Transposition
YBR013C	1.34045	0.0700626	1.1261	0.0176931
YMR067C	1.02339	0.513803	1.12582	0.296601
YJL223C	1.19271	0.0264993	1.12579	0.115586	PAU1	member of the seripauperin protein\/gene family (see Gene_class PAU)
YDR394W	1.16224	0.16113	1.12553	0.581065	RPT3	ATPase (AAA family) component of the 26S proteasome complex
YJR152W	0.968131	0.639392	1.12552	0.0163033	DAL5	allantoate permease
YGL263W	1.04543	0.761372	1.12504	0.334006	COS12	similar to subtelomerically-encoded proteins
YGL228W	1.35806	0.00249458	1.1249	0.28235	SHE10	lethal when overexpressed
YLR170C	0.984395	0.896171	1.12474	0.222145	APS1	clathrin-associated protein complex, small subunit
YDR030C	1.13693	0.0796824	1.12465	0.052914	RAD28	involved in DNA repair, has WD repeats
YHR086W	1.07153	0.319796	1.12455	0.251435	NAM8	putative RNA binding protein, involved in meiosis-specific splicing of the REC107 transcripts in cooperation with the Mer1 protein
YBR043C	1.0644	0.188879	1.12428	0.00709444
YJL214W	1.03702	0.571852	1.12423	0.163816	HXT8	hexose permease
YDR022C	1.22966	0.00361859	1.12421	0.494141	CIS1	involved in microtubule assembly
YDR150W	1.25936	0.384572	1.1242	0.343227	NUM1	Protein with variable number of tandem repeats of a 64 amino-acid polypeptide, potential Ca2+-binding site, and pleckstrin homology domain
YDR067C	1.28582	0.0698563	1.12391	0.277091
YNL158W	1.22812	0.0681309	1.12384	0.0842124
YDR522C	1.02802	0.492258	1.12383	0.521167	SPS2	involved in meiosis
YDR147W	1.04091	0.557916	1.12375	0.471179	EKI1	Ethanolamine Kinase
YHR189W	1.18064	0.0504559	1.12371	0.49525
YOL055C	1.03828	0.703508	1.1237	0.215273	THI20	THI for thiamine metabolism. Transcribed in the presence of low level of thiamine (10-8M) and turned off in the presence of high level (10-6M) of thiamine. Under the positive control of THI2 and THI3.
YNL336W	1.13165	0.0651072	1.12356	0.142053	COS1	similar to subtelomerically-encoded proteins
YPR188C	1.31764	0.0247423	1.12348	0.582318	MLC2	putative light chain for Myo1p
YPL077C	1.05092	0.333824	1.1234	0.124951
YOR105W	1.05745	0.467304	1.12334	0.106437
YGL038C	1.29617	0.0622264	1.12332	0.385628	OCH1	membrane-bound alpha-1,6-mannosyltransferase
YKL066W	1.29675	0.0734455	1.12321	0.218036
YNL266W	1.21718	0.00730397	1.12316	0.54948
YMR127C	1.05685	0.772603	1.12311	0.482441	SAS2	zinc-finger protein
YOR356W	1.05256	0.288259	1.12299	0.0428267
YDR038C	1.33003	0.225062	1.12289	0.0504134	ENA5	Na(+) ATPase
YKR073C	0.975946	0.754836	1.12288	0.14177
YLL059C	1.12148	0.176997	1.12284	0.0256716
YJR093C	1.05473	0.187686	1.12274	0.137417	FIP1	interacts with poly(A)polymerase
YLR462W	1.09939	0.680147	1.12232	0.187389
YNR072W	0.940876	0.0109425	1.12209	0.0542485	HXT17	Putative hexose transporter
YER057C	0.817755	0.404649	1.12205	0.631459	HIG1	heat-regulated protein
YPL150W	1.09693	0.276724	1.12205	0.147611
YIL177C	1.06687	0.160237	1.122	0.0115752
YPL099C	1.60263	0.000577201	1.12184	0.474601
YMR111C	1.15481	0.329871	1.12169	0.019993
YHR006W	1.33693	0.00827739	1.12167	0.317933	STP2	Zinc finger (Cys(2)-His(2))
YKL035W	1.14004	0.0947029	1.12153	0.134917	UGP1	Uridinephosphoglucose pyrophosphorylase
YNL137C	1.03669	0.4432	1.12152	0.325528	NAM9	putative mitochondrial S4 ribosomal protein
YJL087C	1.05402	0.430346	1.12118	0.209905	TRL1	tRNA ligase
YKL041W	1.21744	0.104129	1.12111	0.000573234	VPS24	involved in secretion
YEL034W	0.857475	0.617945	1.12108	0.586704	HYP2	Translation initiation factor eIF-5A
YPL189W	1.15731	0.285586	1.121	0.0102638	GUP2	Putative active glycerol transporter
YDR441C	0.978563	0.374762	1.12096	0.266309	APT2	Adenine Phosphoribosyltransferase
YMR200W	1.1649	0.470556	1.12095	0.44839	ROT1	putative membrane protein
YDR054C	1.32692	0.445693	1.12084	0.47839	CDC34	ubiquitin-conjugating enzyme, E2
YPL217C	0.905971	0.670023	1.12071	0.479061	BMS1	BMH1 sensitive
YDL004W	0.980132	0.863306	1.12063	0.210343	ATP16	ATP synthase delta subunit
YMR126C	1.05482	0.474342	1.12062	0.249249
YGL243W	1.04566	0.849404	1.12026	0.491714	TAD1	tRNA-specific adenosine deaminase 1 (TAD1)\; Tad1p\/scADAT1
YJR114W	1.05385	0.451821	1.12018	0.0354409
YJR100C	1.07263	0.193707	1.12003	0.0567067
YJL068C	0.96912	0.550317	1.11979	0.11768
YLR427W	1.26924	0.0685289	1.11979	0.0511471
YJL112W	1.00915	0.825025	1.11977	0.292345	MDV1	Mitochondrial DiVision
YLR250W	1.07573	0.321051	1.11971	0.288932	SSP120	secretory protein
YPL071C	0.953624	0.535146	1.11957	0.396878
YNL306W	1.23038	0.0570944	1.11953	0.53361
YBR279W	1.30083	0.253877	1.11917	0.484119	PAF1	RNA polymerase II-associated protein
YOR291W	1.09406	0.0480136	1.11906	0.239065
YKR031C	1.05562	0.17516	1.119	0.103875	SPO14	Phospholipase D
YKL007W	1.07077	0.549537	1.11896	0.62461	CAP1	alpha subunit of capping protein
YJR036C	1.10045	0.151622	1.1189	0.0619905	HUL4	ubiquitin-protein ligase (E3)
YPL225W	1.15588	0.0510456	1.11877	0.60637
YCR061W	1.13251	0.155848	1.11874	0.295032
YOL007C	1.1031	0.0108936	1.11865	0.632637	CSI2	Appears to be a structural component of the chitin synthase 3 complex
YNL086W	0.984133	0.79054	1.11852	0.165415
YNL051W	0.968735	0.683459	1.11851	0.0291703
YDL113C	1.02387	0.88828	1.11848	0.119762
YNL177C	1.38237	0.0048217	1.11817	0.166003
YOR194C	1.47333	0.00627534	1.1181	0.454249	TOA1	Transcription factor IIA, large chain
YGR164W	1.03725	0.789968	1.11802	0.366931
YLL063C	1.07849	0.116731	1.11792	0.257326	AYT1	transacetylase
YPL065W	1.49052	0.00464763	1.11775	0.512161	VPS28	involved in vacuolar protein targeting
YMR025W	1.13583	0.308825	1.11757	0.0360641
YLR001C	1.06436	0.262469	1.11751	0.250762
YDR499W	1.18718	0.231347	1.11745	0.00499591	LCD1
YPL128C	1.03646	0.414087	1.11687	0.12131	TBF1	TTAGGG repeat binding factor
YNR011C	1.01581	0.652467	1.11681	0.152444	PRP2	RNA splicing factor RNA-dependent NTPase with DEAD-box motif
YOR068C	1.12199	0.0813796	1.11677	0.327942
YPL190C	0.990057	0.900626	1.11674	0.0609792	NAB3	nuclear polyadenylated RNA\/single strand DNA-binding protein
YJL218W	0.946111	0.332248	1.11665	0.0712448
YPR021C	1.07258	0.238321	1.11665	0.114299
YOL103W	1.00188	0.98871	1.11655	0.625508	ITR2	myo-inositol transporter
YMR129W	0.981999	0.807588	1.11651	0.591344	POM152	Nuclear pore membrane glycoprotein
YML086C	0.902843	0.464533	1.11627	0.298377	ALO1	D-arabinono-1,4-lactone oxidase
YGR022C	1.02716	0.711732	1.11616	0.452855
YIL159W	1.05104	0.125942	1.1161	0.00938099	BNR1	involved in actin filament organization
YNL268W	1.13581	0.346055	1.11597	0.505197	LYP1	lysine permease
YGL035C	1.32157	0.00276582	1.11594	0.112942	MIG1	C2H2 zinc finger protein which resembles the mammalian Egr and Wilms tumour proteins
YER040W	0.862814	0.361449	1.11578	0.463039	GLN3	Transcriptional activator of nitrogen-regulated genes
YMR232W	1.12169	0.016099	1.11568	0.0103159	FUS2	involved in cell fusion
YLR072W	1.15313	0.00459789	1.11537	0.132601
YLR385C	1.2837	0.213675	1.11519	0.394059
YJL196C	0.89947	0.545581	1.11514	0.602598	ELO1	Elongation enzyme 1
YJR012C	1.03218	0.616979	1.11513	0.428318
YKR099W	1.06201	0.134278	1.11493	0.232497	BAS1	transcription factor
YOL105C	1.01921	0.812386	1.11483	0.46117	WSC3	Putative integral membrane protein containing novel cysteine motif. Similarity to SLG1 (WSC1), WSC2 and WSC4
YPL209C	1.06227	0.291958	1.11472	0.0134846	IPL1	Protein kinase
YIR040C	1.04923	0.519306	1.1147	0.313396
YDR397C	1.08048	0.469071	1.11452	0.174851	NCB2	repressor of class II transcription
YNL127W	1.10887	0.0552174	1.11451	0.099138
YPL213W	1.14469	0.187501	1.1142	0.122954	LEA1	similar to human U2A' snRNP protein
YDR479C	1.06167	0.676157	1.11374	0.212615
YKL047W	0.943357	0.666872	1.11369	0.320001
YLR091W	0.995477	0.965755	1.11346	0.299574
YGL181W	1.16155	0.548927	1.11345	0.220108	GTS1	Glycine-threonine-serine repeat protein
YLR272C	1.10122	0.367247	1.11344	0.147928	YCS4	Loss of cohesion
YPL100W	1.05025	0.397785	1.11343	0.243302
YLR282C	0.989769	0.679903	1.11325	0.181698
YNL140C	0.961906	0.621492	1.11317	0.482612
YLR406C	1.01062	0.909191	1.11311	0.423883	RPL31B	Ribosomal protein L31B (L34B) (YL28)
YMR082C	1.02214	0.469591	1.11307	0.273104
YLR244C	0.95857	0.540639	1.11301	0.256612	MAP1	methionine aminopeptidase
YDR425W	1.10331	0.0221236	1.11289	0.0280477
YMR120C	0.70771	0.321414	1.1128	0.637816	ADE17	5-aminoimidazole-4-carboxamide ribonucleotide (AICAR) transformylase\/IMP cyclohydrolase
YPL056C	1.10999	0.225577	1.1127	0.0662242
YOR258W	1.20507	0.122166	1.11226	0.367283
YLR121C	1.02301	0.850376	1.11215	0.278155	YPS3	GPI-anchored aspartic protease
YOL156W	0.958629	0.750878	1.11206	0.115206	HXT11	Glucose permease
YIR020C	1.05533	0.305463	1.11203	0.0715709
YDR434W	1.12081	0.370088	1.11197	0.439528
YJR108W	1.08914	0.0932581	1.11181	0.000453329	ABM1	ABerrant Microtubules
YHR112C	0.969874	0.712873	1.11179	0.555208		Cystathionine gamma-synthase
YPL013C	1.22349	0.22196	1.11173	0.0400013
YDL011C	1.09221	0.128742	1.11157	0.0321328
YFR013W	1.0353	0.562941	1.11141	0.174347	IOC3	ISWI One Complex
YBR076W	1.82943	0.0374518	1.11113	0.54079	ECM8	involved in cell wall biogenesis
YOR343C	1.28979	0.0669094	1.1109	0.013082
YPR108W	1.05187	0.513096	1.11055	0.066301	RPN7	Subunit of the regulatory particle of the proteasome
YLR234W	0.930481	0.311664	1.11037	0.092373	TOP3	DNA Topoisomerase III
YJR010W	0.965468	0.477626	1.11032	0.492774	MET3	ATP sulfurylase
YPL270W	1.06711	0.325016	1.11028	0.252704	MDL2	ATP-binding cassette (ABC) transporter family member
YIL010W	1.24366	0.0033219	1.11025	0.541764	DOT5	involved in telomeric silencing
YNL282W	1.11684	0.490281	1.1102	0.56757	POP3	RNase P and RNase MRP subunit
YDR347W	0.807675	0.184688	1.1102	0.344977	MRP1	37 kDa mitochondrial ribosomal protein
YMR255W	1.89458	0.0314794	1.11005	0.446703	GFD1	GREAT for FULL DEAD box protein activity
YDR407C	1.01888	0.536054	1.11001	0.0251132	TRS120	Component of targeting complex (TRAPP) involved in ER to Golgi membrane traffic
YMR122C	1.04898	0.615526	1.10988	0.287801
YCR001W	0.982988	0.931276	1.10985	0.831312
YDR319C	1.31921	0.0174413	1.10982	0.495976
[truncated: 4,192 more rows]

## Sheet: C.albicans
C.albicans microarray data
	SX (xylose) vs SD	SX (xylose) vs SD
ORF	Signal ratio	P-value	Annotation	Description
orf19.7094	73.5875	0.02141	HGT12	Glucose, fructose, mannose transporter; major facilitator superfamily; role in macrophage-induced hyphal growth; detected at germ tube plasma membrane by mass spectrometry; Snf3p-induced; 12 probable transmembrane segments
orf19.3668	48.6461	0.0198763	HGT2	Putative glucose transporter of the major facilitator superfamily; the C. albicans glucose transporter family comprises 20 members; 12 probable membrane-spanning segments; expressed in rich medium with 2% glucose
orf19.5307	46.0536	0.0290041	JEN2	Protein described as carboxylic acid transporter; induced by Rgt1p; transcription is upregulated in both intermediate and mature biofilms
orf19.638	41.3085	0.0448646	FDH1	Putative formate dehydrogenase, oxidizes formate to produce CO2; induced during macrophage infection; fluconazole-downregulated; Mig1p regulated; downregulated by Efg1p under yeast, not hyphal, growth conditions; predicted to be cytosolic
orf19.3160	38.3786	0.0337695	HSP12	Heat-shock protein; induced upon osmotic/oxidative/cadmium stress, fluphenazine treatment, low iron, CDR1 and CDR2 overexpression, or ssn6 or ssk1 homozygous null mutation; repressed by Hog1p, flucytosine, elevated CO2
orf19.4317	32.3698	0.035855	GRE3	Similar to D-xylose reductases; antigenic in murine systemic infection; soluble protein in hyphae; transcriptionally induced by macrophage interaction; transcriptionally induced by Mnl1p under weak acid stress, farnesol-induced
orf19.4384	28.0724	0.00209833	HXT5	Protein described as a sugar transporter; transcription is upregulated in response to treatment with ciclopirox olamine; Snf3p-induced; alkaline downregulated; shows colony morphology-related gene regulation by Ssn6p
orf19.644	27.4466	0.0584186	HGT9	Putative glucose transporter of the major facilitator superfamily; the C. albicans glucose transporter family comprises 20 members; 12 probable membrane-spanning segments; induced at low (0.2%, compared to 2%) glucose in rich media; intron
orf19.5525	22.5988	0.0312115		Protein abundance is affected by URA3 expression in the CAI-4 strain background; regulated by Efg1p and Efh1p; repressed by Rgt1p; protein detected by mass spec in exponential and stationary phase cultures
orf19.2460	22.5961	0.0301496		Predicted ORF in Assemblies 19, 20 and 21; exogenously expressed protein is a substrate for Kex2p processing in vitro; transcription is repressed in response to alpha pheromone in SpiderM medium
orf19.535	22.2019	0.00287083	RBR1	Glycosylphosphatidylinositol (GPI)-anchored cell wall protein required for filamentous growth at acidic pH; expression is repressed by Rim101p and activated by Nrg1p
orf19.4216	21.962	0.0538893		Predicted ORF in Assemblies 19, 20 and 21; decreased expression in hyphae compared to yeast-form cells; transcription is increased in populations of cells exposed to fluconazole over multiple generations
orf19.4682	19.2655	0.00171404	HGT17	Putative glucose transporter of the major facilitator superfamily; the C. albicans glucose transporter family comprises 20 members; 12 probable membrane-spanning segments; induced at low (0.2%, compared to 2%) glucose in rich media
orf19.6486	18.5581	0.033266	LDG3	Predicted ORF in Assemblies 19, 20 and 21; induced upon biofilm formation
orf19.1788	15.1085	0.0264245		Predicted ORF from Assembly 19; merged with orf19.1290 in Assembly 20
orf19.2846	14.5431	0.0375941		Predicted ORF in Assemblies 19, 20 and 21; induced in core caspofungin response; transcription regulated upon yeast-hyphal switch
orf19.893	13.8325	0.00321754	PGA17	Putative GPI-anchored protein of unknown function; exogenously expressed protein is a substrate for Kex2p processing in vitro; transcription is repressed in response to alpha pheromone in SpiderM medium; macrophage-induced gene
orf19.1239	13.2909	0.0227531		Predicted ORF in Assemblies 19, 20 and 21; exogenously expressed protein is a substrate for Kex2p processing in vitro; fluconazole-downregulated; possibly spurious ORF (Annotation Working Group prediction)
orf19.3548.1	13.0209	0.0354745	WH11	Cytoplasmic protein expressed specifically in white phase yeast-form cells; expression in opaque cells increases virulence and frequency of opaque-to-white switching; null mutant shows wild-type switching; similar to S. cerevisiae Hsp12p
orf19.2896	12.9376	0.0016374	SOU1	Enzyme involved in utilization of L-sorbose; has sorbitol dehydrogenase, fructose reductase, and sorbose reductase activities; has NAD-binding site motif; transcriptional regulation affected by chromosome 5 copy number
orf19.1344	11.4448	0.000341429		Predicted ORF in Assemblies 19, 20 and 21; fluconazole-induced; possibly spurious ORF (Annotation Working Group prediction)
orf19.3439	11.0713	0.00722281		Predicted ORF in Assemblies 19, 20 and 21; greater mRNA abundance observed in a cyr1 homozygous null mutant than in wild type
orf19.896	9.60622	0.0238022	CHK1	Histidine kinase involved in a two-component signaling pathway that regulates cell wall biosynthesis; disruption impairs hyphal development and decreases virulence in mouse intravenous (but not rat vaginal) infection
orf19.7514	9.52128	0.00457225	PCK1	Phosphoenolpyruvate carboxykinase; role in gluconeogenesis; regulated by hyphal switch, carbon source; repressed on glucose; induced by fluconazole, phagocytosis, H2O2; predicted ATP-dependent, dimeric; predicted PKC phosphorylation sites
orf19.1151	8.22293	0.000175243		Predicted ORF from Assembly 19; induced in core stress response; merged with orf19.1152 in Assembly 20
orf19.4065	8.13479	0.082707		Predicted ORF from Assembly 19; removed from Assembly 20
orf19.6508	8.1251	0.0219168		Predicted ORF in Assemblies 19, 20 and 21
orf19.2192	7.91211	0.00477495	GDH2	Putative NAD-specific glutamate dehydrogenase; fungal-specific (no human or murine homolog); transcription is regulated by Nrg1p, Mig1p, Tup1p, and Gcn4p
orf19.7310	7.82513	0.00833849		Protein similar to S. cerevisiae Gin3p; transcription is upregulated in response to treatment with ciclopirox olamine; positively regulated by Sfu1p; Hog1p, fluconazole-downregulated
orf19.1584	7.30422	0.0470196		Predicted membrane transporter, member of the monocarboxylate porter (MCP) family, major facilitator superfamily (MFS); shows colony morphology-related gene regulation by Ssn6p
orf19.7676	7.27808	0.057292	XYL2	Protein described as similar to D-xylulose reductase; immunogenic in mouse; soluble protein in hyphae; Hog1p-induced; induced during cell wall regeneration; caspofungin or fluconazole-induced; Mnl1p-induced in weak acid stress
orf19.742	7.06997	0.000454181	ALD6	Putative aldehyde dehydrogenase; expression is regulated upon white-opaque switching; protein detected by mass spec in stationary phase cultures; transcription is upregulated in both intermediate and mature biofilms
orf19.3934	7.02313	0.00226397	CAR1	Transcription is regulated by Nrg1p, Mig1p, and Tup1p; shows colony morphology-related gene regulation by Ssn6p; alkaline upregulated; protein level decreased in stationary phase cultures
orf19.532	6.19346	0.00955999	RBR2	Cell wall protein; expression is repressed by Rim101p; expression is regulated upon white-opaque switching; transcription is repressed in response to alpha pheromone in SpiderM medium; macrophage-induced gene
orf19.2531	6.12681	0.0158605	CSP37	Plasma membrane, hyphal cell wall protein; role in progression of murine systemic infection; predicted P-loop, divalent cation binding, N-glycosylation sites; expressed in yeast and hyphae; hyphal downregulated; lacks S. cerevisiae homolog
orf19.2941	6.05282	0.100858	SCW4	Putative cell wall protein; exogenously expressed protein is a substrate for Kex2p processing in vitro; expression is regulated upon white-opaque switching; alkaline downregulated
orf19.251	5.87507	0.0276637		ThiJ/PfpI protein family; antigenic (Cand a 3 allergen); binds human immunoglobulin E; 2 N-glycosylation motifs; alkaline, fluconazole, Hog1p-downregulated; induced in core stress response or by oxidative stress (via Cap1p)
orf19.4934	5.82271	0.052547	OP4	Ala- Leu- and Ser-rich protein; N-terminal hydrophobic region; possible glycosylation; gene is transcribed specifically in opaque-phase cells, repressed by alpha pheromone in opaque MTLa homozygotes
orf19.5565	5.79225	0.1196		Putative 3-hydroxyisobutyrate dehydrogenase
orf19.1541	5.74227	0.0891563		Protein not essential for viability; transcription is repressed in response to alpha pheromone in SpiderM medium
orf19.1982	5.72339	0.0296766		Predicted ORF from Assembly 19; merged with orf19.588 in Assembly 20
orf19.1290	5.59839	0.0519843	XKS1	Predicted ORF in Assemblies 19, 20 and 21; increased expression in response to prostaglandins
orf19.1996	5.55657	0.0542084	CHA1	Protein similar to serine/threonine dehydratases, catabolic; negatively regulated by Rim101p; expression greater in low iron; regulated on white-opaque switching; filament induced; transposon mutation affects filamentous growth
orf19.6784	5.50763	0.000138994	PGA32	Putative GPI-anchored protein of unknown function; transcriptionally regulated by iron; expression greater in high iron
orf19.3152	5.44651	0.0405593	AMO2	Protein similar to A. niger predicted peroxisomal copper amino oxidase; mutation confers hypersensitivity to toxic ergosterol analog; induced upon biofilm formation
orf19.7284	5.09503	0.00122941	ASR2	Gene regulated by cAMP and by osmotic stress; greater mRNA abundance observed in a cyr1 or ras1 homozygous null mutant than in wild type; protein detected by mass spec in stationary phase cultures
orf19.2787	4.87941	0.0530117	PRY1	Transcription is opaque specific; transcription is repressed in response to alpha pheromone in SpiderM medium
orf19.6229	4.64112	0.000149856	CAT1	Catalase; role in resistance to oxidative stress, neutrophils, peroxide; role in murine systemic virulence; regulated by iron, ciclopirox olamine, fluconazole, growth, carbon source, pH, Rim101p, Ssn6p, Hog1p, farnesol, core stress response
orf19.6491	4.63236	0.0189678		Predicted ORF in Assemblies 19, 20 and 21
orf19.4527	4.57154	0.00144169	HGT1	High-affinity glucose transporter, member of major facilitator superfamily; transcription induced by progesterone and by drugs including chloramphenicol and benomyl; likely essential for growth, based on an insertional mutagenesis strategy
orf19.5645	4.5661	0.00143166	MET15	O-acetylhomoserine O-acetylserine sulfhydrylase; involved in sulfur amino acid biosynthesis; immunogenic; Hog1p, biofilm, possibly adherence-induced; brown colony color of homozygous mutant in Pb(2+) medium is visual selection marker
orf19.715	4.31455	0.0016018		Predicted ORF in Assemblies 19, 20 and 21
orf19.3733	4.26199	0.00449836	IDP2	Putative isocitrate dehydrogenase; expression is regulated upon white-opaque switching; shows colony morphology-related gene regulation by Ssn6p; protein detected by mass spec in exponential and stationary phase cultures
orf19.7447	4.24552	0.00629715	JEN1	Lactate transporter; transcriptionally induced by lactic acid, activated by Cat8p; alkaline downregulated by Rim101p; localizes to plasma membrane; similar to S. cerevisiae Jen1p
orf19.2959.1	4.24489	0.0707597		ORF Predicted by Annotation Working Group
orf19.3330.3	4.14404	0.0342184	POX18	Protein not essential for viability; similar to Candida maltosa Pox18p, which is a peroxisomal protein; Assembly 21 sequence was updated based on comparative genome analysis and new sequence data, and allelic orf19.10841 was reinstated
orf19.5514	4.05656	0.0353298		Predicted ORF in Assemblies 19, 20 and 21
orf19.510	4.01462	0.0969365		Predicted ORF in Assemblies 19, 20 and 21; possibly spurious ORF (Annotation Working Group prediction)
orf19.716	3.98095	0.111037		Predicted ORF in Assemblies 19, 20 and 21; regulated by Nrg1p, Tup1p; transcription is repressed in response to alpha pheromone in SpiderM medium
orf19.4274	3.96929	0.0035306	PUT1	Alkaline upregulated by Rim101p
orf19.1473	3.84074	0.000373648		Predicted ORF in Assemblies 19, 20 and 21; transcription is induced in response to alpha pheromone in SpiderM medium
orf19.935	3.79106	0.00124919	AGA1	Protein with some similarity to agglutinin subunit; expression is regulated upon white-opaque switching
orf19.868	3.72532	0.000260477	ADAEC	Transcription is specific to white cell type
orf19.4066	3.67791	0.00164533		Predicted ORF in Assemblies 19, 20 and 21; Hog1p-downregulated
orf19.3133	3.6664	0.0417578	GUT2	Predicted ORF in Assemblies 19, 20 and 21; Plc1p-regulated; transcription is upregulated in both intermediate and mature biofilms
orf19.7566	3.63267	0.0516749		Putative protein of unknown function, transcription is upregulated in clinical isolates from HIV+ patients with oral candidiasis; alkaline upregulated by Rim101p; fungal-specific (no human or murine homolog)
orf19.6322	3.60216	0.00903113	ARD	D-arabitol dehydrogenase, NAD-dependent (ArDH); enzyme of D-arabitol and D-arabinose catabolism; D-arabitol is a marker for active infection in humans; has conserved YXXXK motif of short-chain alcohol-polyol-sugar dehydrogenases
orf19.2737	3.59483	0.000916439		Predicted ORF in Assemblies 19, 20 and 21
orf19.94	3.5053	3.46107e-05		Predicted ORF in Assemblies 19, 20 and 21
orf19.5675	3.46491	0.0425449		Predicted ORF in Assemblies 19, 20 and 21
orf19.4335	3.45657	0.0105252	TNA1	Putative nicotinic acid transporter; fungal-specific (no human or murine homolog); detected at germ tube plasma membrane by mass spectrometry; transcriptionally induced upon phagocytosis by macrophage
orf19.3931	3.39013	0.114347	SFC1	Putative acyltransferase; alkaline upregulated; transcription is upregulated in both intermediate and mature biofilms
orf19.3127	3.32798	0.00640834	CZF1	Transcriptional regulator of white-opaque switching frequency; hyphal growth regulator; has C-terminal zinc finger and central Glu-rich region; expression in S. cerevisiae causes dominant-negative inhibition of pheromone response
orf19.7481	3.31804	2.193e-05	MDH1	Protein described as malate dehydrogenase, mitochondrial; transcription regulated by Mig1p and Tup1p, white-opaque switching; induced in high iron, biofilm; regulated upon phagocytosis; antigenic during murine or human infection
orf19.6757	3.28731	0.0278383	GCY1	Predicted ORF in Assemblies 19, 20 and 21; mutation confers hypersensitivity to toxic ergosterol analog; farnesol-downregulated; protein detected by mass spec in stationary phase cultures
orf19.5971	3.28086	0.142649		Predicted ORF in Assemblies 19, 20 and 21
orf19.986	3.27167	0.0438271	GLY1	L-threonine aldolase; possibly tetrameric; complements the glycine auxotrophy of an S. cerevisiae shm1 null shm2 null gly1-1 triple mutant; macrophage/pseudohyphal-induced; the GLY1 locus has an RFLP and is triploid in strain SGY269
orf19.5641	3.24761	0.00950305	CAR2	Alkaline upregulated; mutation confers hypersensitivity to toxic ergosterol analog, and to amphotericin B
orf19.3684	3.23921	0.0272611		Predicted ORF in Assemblies 19, 20 and 21
orf19.4980	3.2384	0.0298922	HSP70	Putative hsp70 chaperone; role in sensitivity to beta-defensins; heat-shock, amphotericin B, Cd, ketoconazole-induced; farnesol-downregulated in biofilm; farnesol-induced; surface localized in yeast-form and hyphal cells; antigenic in host
orf19.4539	3.21611	0.000511769		Predicted ORF in Assemblies 19, 20 and 21
orf19.3335	3.18294	0.00061923		Predicted ORF in Assemblies 19, 20 and 21; shows colony morphology-related gene regulation by Ssn6p; repressed by nitric oxide
orf19.1862	3.11514	0.00343945		Possible stress protein; increased transcription is associated with CDR1 and CDR2 overexpression or fluphenazine treatment; transcription regulated by Sfu1p, Nrg1p, Tup1p
orf19.1152	3.08575	0.0378774		Predicted ORF in Assemblies 19, 20 and 21; regulated by Gcn2p and Gcn4p; induced in core stress response
orf19.7608	3.07527	0.0305097		Predicted ORF in Assemblies 19, 20 and 21; fluconazole-downregulated; possibly spurious ORF (Annotation Working Group prediction)
orf19.5102	3.05836	0.0061668	PLB5	Putative phospholipase B, fungal-specific (no human or murine homolog); null mutation eliminates cell-associated phospholipase A2 activity and attenuates virulence; putative GPI anchor
orf19.1564	3.03027	0.0105596		Predicted ORF in Assemblies 19, 20 and 21
orf19.6077	3.02842	0.0501312		Predicted ORF in Assemblies 19, 20 and 21; shows colony morphology-related gene regulation by Ssn6p
orf19.3007.2	3.0279	0.00636663		ORF Predicted by Annotation Working Group
orf19.744	3.00803	0.063918	GDB1	Putative glycogen debranching enzyme; expression is regulated upon white-opaque switching; regulated by Nrg1p, Tup1p
orf19.1089	2.9678	0.00019622	PEX11	Putative protein involved in fatty acid oxidation; expression is Tac1p-dependent
orf19.6329	2.93904	0.0333889		Predicted ORF in Assemblies 19, 20 and 21; opaque-specific transcription; fluconazole-downregulated; greater mRNA abundance in a cyr1 homozygous null mutant than in wild type; possibly spurious ORF (Annotation Working Group prediction)
orf19.3612	2.88623	6.18543e-06	PST2	Putative NADH:quinone oxidoreductase; similar to 1,4-benzoquinone reductase; immunogenic in mice; benomyl treatment induces transcription; oxidative stress-induced via Cap1p; fungal-specific (no human/murine homolog), farnesol-downregulated
orf19.1224	2.86935	0.0545653	FRP3	Upregulated in the presence of human neutrophils; fluconazole-downregulated; repressed by nitric oxide
orf19.6008	2.82826	0.000653777		Predicted ORF in Assemblies 19, 20 and 21; transcription is repressed in response to alpha pheromone in SpiderM medium
orf19.2947	2.81958	0.00765208	SNZ1	Detected in stationary phase cultures; soluble in hyphae; induced on yeast to hyphal switch, in response to 3-aminotriazole, or in azole-resistant strain overexpressing MDR1; regulated by Gcn4p, macrophage; no human/murine homolog
orf19.5005	2.69736	0.00274124	OSM2	Protein described as mitochondrial fumarate reductase; regulated by Ssn6p, Gcn2p, and Gcn4p; Hog1p-downregulated; protein detected by mass spec in stationary phase cultures
orf19.4402	2.69644	0.0576883		Predicted ORF from Assembly 19; possibly spurious ORF (Annotation Working Group prediction); removed from Assembly 20
orf19.6445	2.69097	0.0222295	ECI1	Protein similar to S. cerevisiae Eci1p, which is involved in fatty acid oxidation; transposon mutation affects filamentous growth; expression is regulated upon white-opaque switching
orf19.2673	2.68944	0.459764		Predicted ORF in Assemblies 19, 20 and 21
orf19.5125	2.68672	0.000649024		Predicted ORF in Assemblies 19, 20 and 21; expression regulated during planktonic growth
orf19.1655	2.68285	0.034277	PXP2	Putative acyl-CoA oxidase; enzyme of fatty acid beta-oxidation; induced during macrophage infection; expression is opaque specific; has putative peroxisome targeting signal
orf19.682	2.68159	0.00768442		Predicted ORF from Assembly 19; ketoconazole-induced; fluconazole-downregulated; induced in a cyr1 homozygous null mutant; shows colony morphology-related gene regulation by Ssn6p; merged with orf19.2296 in Assembly 20
orf19.2613	2.6523	0.000615205	ECM4	Protein similar to S. cerevisiae Ecm4p; transcription is regulated by Nrg1p and Tup1p; induced in core stress response or in cyr1 or ras1 homozygous null mutant (yeast-form or hyphal cells); transposon mutation affects filamentous growth
orf19.3974	2.63365	0.0603309	PUT2	Alkaline upregulated; protein detected by mass spec in exponential and stationary phase cultures
orf19.254	2.62194	0.0156601		Predicted ORF in Assemblies 19, 20 and 21; Hog1p-downregulated
orf19.2747	2.61031	0.000942257	RGT1	Transcriptional repressor involved in the regulation of glucose transporter genes; has zinc-cluster; similar to S. cerevisiae Rgt1p
orf19.1974	2.58012	0.0387817	TFS1	Transcription is regulated upon yeast-hyphal switch; shows colony morphology-related gene regulation by Ssn6p
orf19.5169	2.55372	0.128011		Predicted ORF in Assemblies 19, 20 and 21
orf19.6838	2.5388	0.0595998		Putative protein of unknown function, transcription is upregulated in clinical isolates from HIV+ patients with oral candidiasis; predicted ORF in Assemblies 19, 20 and 21
orf19.6178	2.53857	0.00425245	FBP1	Fructose-1,6-bisphosphatase, a key enzyme of gluconeogenesis; involved in the carbohydrate metabolism; regulated by Efg1p, Ssn6p; upregulated upon phagocytosis, effecting switch from glycolysis to gluconeogenesis in macrophage
orf19.2344	2.53242	0.0150018	ASR1	Protein described as similar to heat shock proteins; transcription regulated by cAMP, osmotic stress, ciclopirox olamine, ketoconazole; negatively regulated by Cyr1p, Ras1p; shows colony morphology-related gene regulation by Ssn6p
orf19.7586	2.53074	0.00280955	CHT3	Chitinase, major; functional homolog of S. cerevisiae Cts1p; 4 N-glycosylation motifs; possible O-mannosylated region; putative signal peptide; hyphal-repressed; farnesol upregulated in biofilm; regulated by Efg1p, Cyr1p, Ras1p
orf19.6336	2.51304	0.0118706	PGA25	Putative GPI-anchored protein of unknown function; fluconazole-downregulated
orf19.345	2.51039	0.0745948		Predicted ORF in Assemblies 19, 20 and 21
orf19.6306	2.49527	0.0167563		Trimethylaminobutyraldehyde dehydrogenase, the third enzyme of the carnitine biosynthesis pathway
orf19.5447	2.48475	0.000911544	HGT19	Putative glucose/myo-inositol transporter of major facilitator superfamily; 12 transmembrane segments, extended N terminus; expressed in rich medium, 2% glucose; phagocytosis-induced; C. albicans glucose transporter family has 20 members
orf19.7053	2.46828	0.0444109	GAC1	Protein described as similar to regulatory subunit of serine/threonine phosphoprotein phosphatase 1; fluconazole-induced; caspofungin repressed; transcriptionally activated by Mnl1p under weak acid stress; regulated by Nrg1p, Tup1p
orf19.946	2.46374	0.000188368	MET14	Predicted ORF in Assemblies 19, 20 and 21; predicted role in sulfur metabolism; induced upon biofilm formation; possibly adherence-induced
orf19.4742	2.45924	0.0401861		Predicted ORF in Assemblies 19, 20 and 21; possibly spurious ORF (Annotation Working Group prediction)
orf19.6316	2.42009	0.0849595		Predicted membrane transporter, member of the L-amino acid transporter-3 (LAT3) family, major facilitator superfamily (MFS)
orf19.695	2.40544	0.00108332	RGS2	Protein of RGS superfamily; not essential for viability; possibly spurious ORF (Annotation Working Group prediction)
orf19.4894	2.39895	0.00419639		Protein of unknown function, has similarity to S. cerevisiae Yer010cp, which is a protein of unknown function belonging to the prokaryotic RraA family; decreased transcription is observed upon benomyl treatment
orf19.1225	2.38598	0.091091		Predicted ORF in Assemblies 19, 20 and 21; possibly spurious ORF (Annotation Working Group prediction)
orf19.5250	2.38533	0.0852772		Predicted ORF in Assemblies 19, 20 and 21
orf19.3070.1	2.36545	0.0171549		ORF Predicted by Annotation Working Group; merged with orf19.1288 in Assembly 20
orf19.3435	2.35339	0.0050741		Predicted ORF in Assemblies 19, 20 and 21
orf19.1395	2.32576	0.00510767		Predicted ORF in Assemblies 19, 20 and 21
orf19.3219	2.31014	0.0453264		Predicted ORF in Assemblies 19, 20 and 21
orf19.4132	2.30893	0.0422542		Predicted ORF in Assemblies 19, 20 and 21
orf19.2646	2.30638	0.00143123		Predicted zinc-finger protein of unknown function, not essential for viability
orf19.1743	2.30587	0.049313	ACS1	Putative acetyl-CoA synthetase, similar to S. cerevisiae Acs1p; upregulated in the presence of human neutrophils; fluconazole-downregulated; regulated by Nrg1p and Mig1p; shows colony morphology-related gene regulation by Ssn6p
orf19.7500	2.30263	0.0113353	PXA1	Putative peroxisomal, half-size adrenoleukodystrophy protein (ALD or ALDp) subfamily ABC family transporter
orf19.7304	2.2967	0.0235248		Predicted ORF in Assemblies 19, 20 and 21
orf19.2496	2.28311	0.0721353		Predicted ORF in Assemblies 19, 20 and 21; fluconazole-downregulated
orf19.1313	2.27223	0.00260743	CDR3	Transporter of the Pdrp/Cdrp family of the ATP-binding cassette (ABC) superfamily; transports phospholipids in an out-to-in direction; expressed in opaque-phase cells; induced by macrophage interaction; fluconazole-downregulated
orf19.5686	2.26567	0.00569974		Predicted ORF in Assemblies 19, 20 and 21
orf19.3969	2.2569	0.000394439		Predicted ORF in Assemblies 19, 20 and 21
orf19.5000	2.24825	0.16937	CYB2	Protein described as precursor protein of cytochrome b2; transcriptionally regulated by iron; expression greater in high iron; alkaline downregulated; shows colony morphology-related gene regulation by Ssn6p
orf19.2515	2.24742	0.083883		Predicted ORF in Assemblies 19, 20 and 21
orf19.1906	2.22742	0.110675		Predicted ORF in Assemblies 19, 20 and 21
orf19.6073	2.21999	0.00409024	HMX1	Heme oxygenase; acts in utilization of hemin iron; gene transcriptionally activated by heat, low iron, or hemin; negatively regulated by Efg1p; expression greater in low iron; upregulated by Rim101p at pH 8
orf19.778	2.2197	0.036686	PIL1	Echinocandin-binding protein; localizes to cell surface of hyphae, but not yeast-form cells; biofilm induced; fungal-specific (no human or murine homolog)
orf19.4445	2.21945	0.00303699		Predicted ORF in Assemblies 19, 20 and 21; Plc1p-regulated
orf19.6688	2.21905	0.134952		Decreased transcription is observed upon benomyl treatment or in an azole-resistant strain that overexpresses MDR1
orf19.7098	2.20238	0.0103856		Predicted ORF in Assemblies 19, 20 and 21; repressed by nitric oxide
orf19.7281	2.1978	0.00151123	PDK2	Predicted ORF in Assemblies 19, 20 and 21; mutation confers hypersensitivity to amphotericin B
orf19.5519	2.19313	0.0976793	GCV1	Protein described as T subunit of glycine decarboxylase; transcription is negatively regulated by Sfu1p
orf19.4910	2.16658	0.00184786	FGR41	Putative GPI-anchored protein; transposon mutation affects filamentous growth; possibly spurious ORF (Annotation Working Group prediction)
orf19.5037	2.16305	0.0696335		Protein not essential for viability
orf19.376	2.15964	0.123163		Predicted ORF in Assemblies 19, 20 and 21
orf19.1071	2.15184	0.00132167		Predicted ORF from Assembly 19; possibly spurious ORF (Annotation Working Group prediction); merged with orf19.5203 in Assembly 20
orf19.4763	2.15101	0.0163191		Protein not essential for viability
orf19.4833	2.14292	0.00179737	MLS1	Malate synthase; enzyme of the glyoxylate cycle; peroxisomal; no mammalian homolog; transcription is induced upon phagocytosis by macrophage; regulated upon white-opaque switching; biofilm-repressed; strong oxidative stress induced
orf19.4246	2.12923	0.000432556		Predicted ORF in Assemblies 19, 20 and 21; similar to S. cerevisiae Ykr070wp; transposon mutation affects filamentous growth; Hog1p-downregulated; shows colony morphology-related gene regulation by Ssn6p; induced during cell wall regeneration
orf19.2942	2.12848	0.000540226	DIP5	Putative permease for dicarboxylic amino acids; mutation confers hypersensitivity to toxic ergosterol analog; transcriptionally induced upon phagocytosis by macrophage; Gcn4p-regulated; upregulated by Rim101p at pH 8
orf19.4918	2.12616	0.0457017		Predicted ORF in Assemblies 19, 20 and 21
orf19.424	2.12419	0.0185535	TRP99	Protein described as thioredoxin peroxidase/alkyl hydroperoxide reductase; transcriptionally regulated by iron; expression greater in low iron; regulated by Gcn4p; induced in response to amino acid starvation (3-aminotriazole treatment)
orf19.3029	2.12269	0.0224217		Predicted ORF in Assemblies 19, 20 and 21
orf19.5278	2.12221	0.00359099		Predicted ORF in Assemblies 19, 20 and 21
orf19.7115	2.12116	0.0157309	SAC7	Protein described as a GTPase activating protein (GAP) for RHO1; downregulated upon adherence to polystyrene; macrophage/pseudohyphal-repressed; transcription is upregulated in RHE model of oral candidiasis and in clinical oral candidiasis
orf19.111	2.11775	0.0137783	CAN2	Putative amino acid permease; transcription is regulated by Nrg1p and Tup1p; caspofungin induced; flucytosine induced; shows colony morphology-related gene regulation by Ssn6p; ; fungal-specific (no human or murine homolog)
orf19.13	2.08887	0.00123505		Putative glucokinase; regulated upon yeast-hyphal switch; regulated by Efg1p; fluconazole-induced; induced in core stress response; shows colony morphology-related gene regulation by Ssn6p; merged with orf19.734 in Assembly 20
orf19.356	2.08857	0.020761	GTT13	Predicted ORF in Assemblies 19, 20 and 21; opaque-specific transcription; transcription is repressed in response to alpha pheromone in SpiderM medium
orf19.1789.1	2.08705	0.0288163	LYS1	Saccharopine dehydrogenase (biosynthetic); enzyme of alpha-aminoadipate lysine biosynthesis pathway; functionally complements S. cerevisiae lys1 mutation; fungal-specific (no human or murine homolog)
orf19.1113	2.07569	0.00203311		Predicted ORF in Assemblies 19, 20 and 21; possibly spurious ORF (Annotation Working Group prediction)
orf19.5267	2.07369	0.0535692		Putative cell wall protein; downregulated in core caspofungin response; transcription is repressed in response to alpha pheromone in SpiderM medium; transcription repressed in ace2 null mutant
orf19.2738	2.06371	0.101818	SUL2	Protein described as a sulfate transporter; transcription is negatively regulated by Sfu1p; induced upon biofilm formation; amphotericin B induced
orf19.5308	2.06276	0.0366845		Predicted ORF in Assemblies 19, 20 and 21; induced by Rgt1p
orf19.5843	2.06248	0.135031		Predicted ORF in Assemblies 19, 20 and 21; Plc1p-regulated; greater mRNA abundance observed in a cyr1 homozygous null mutant than in wild type; possibly spurious ORF (Annotation Working Group prediction)
orf19.2948	2.06234	0.155832	SNO1	Protein of unknown function expressed during stationary phase; transcription is regulated by Tup1p, Efg1p
orf19.2701	2.04697	0.0214362		Predicted ORF in Assemblies 19, 20 and 21; greater mRNA abundance observed in a cyr1 or ras1 homozygous null mutant than in wild type
orf19.6245	2.04584	0.0280631		Predicted ORF in Assemblies 19, 20 and 21; regulated by osmotic stress (via Hog1p) and oxidative stress (Hog1p- and Cap1p-independent); transcription is induced in response to alpha pheromone in SpiderM medium
orf19.3216	2.04269	0.00507813		Similar to Rab GTPase activators
orf19.4477	2.02557	0.0636222	CSH1	Member of aldo-keto reductase family, similar to aryl alcohol dehydrogenases; role in adhesion to fibronectin, cell surface hydrophobicity; regulated by temperature, growth phase, benomyl, macrophage interaction; azole resistance associated
orf19.4979	2.02096	0.00941794	KNS1	Protein not essential for viability; similar to S. cerevisiae Kns1p, which is a protein kinase
orf19.5006	2.01603	0.00924274	GCV3	Predicted ORF in Assemblies 19, 20 and 21; protein level decreased in stationary phase cultures
orf19.2769	2.01482	0.028492		Predicted ORF in Assemblies 19, 20 and 21; hyphal-induced expression; greater mRNA abundance observed in a cyr1 or ras1 homozygous null mutant than in wild type
orf19.238	1.9889	0.0125393	CCP1	Similar to cytochrome-c peroxidase N terminus; transcription is negatively regulated by Rim101p or alkaline pH; transcription induced by interaction with macrophage or low iron; oxygen-induced activity
orf19.4504	1.98729	0.0227946		Predicted ORF in Assemblies 19, 20 and 21
orf19.2028	1.98694	0.00150513	MXR1	Protein described as a methionine sulfoxide reductase; flucytosine induced; Plc1p-regulated; upregulated in the presence of human neutrophils; macrophage regulated (gene induced, protein decreased); possibly adherence-induced
orf19.2706	1.98633	0.0259991	CRH11	Putative ortholog of S. cerevisiae Crh1p; predicted glycosyl hydrolase domain; similar to Csf4p, to antigenic Aspergillus fumigatus Aspf9; predicted Kex2p substrate; putative GPI-anchor; localizes to cell wall; caspofungin-induced
orf19.5753	1.98472	0.136594	HGT10	Glycerol permease involved in glycerol uptake; member of the major facilitator superfamily; induced by osmotic stress, at low glucose in rich media, during cell wall regeneration; 12 membrane spans
orf19.842	1.98216	0.0423619	ASR3	Gene regulated by cAMP and by osmotic stress; greater mRNA abundance observed in a cyr1 or ras1 homozygous null mutant than in wild type; possibly spurious ORF (Annotation Working Group prediction)
orf19.1664	1.97837	0.00115168		Predicted ORF in Assemblies 19, 20 and 21; decreased expression observed in an ssr1 homozygous null mutant
orf19.802	1.97252	0.0299445	UGA1	Protein described as GABA transaminase; transcription regulated by Mig1p and Tup1p; protein detected by mass spec in stationary phase cultures
orf19.734	1.97049	0.00221826	GLK1	Putative glucokinase; transcription is regulated upon yeast-hyphal switch; transcriptionally regulated by Efg1p; fluconazole-induced; induced in core stress response; shows colony morphology-related gene regulation by Ssn6p
orf19.4012	1.97009	0.115632	PCL5	Protein similar to S. cerevisiae Pcl5p and other cyclins for Pho85p kinase; Gcn4p-induced; suppresses toxicity of C. albicans Gcn4p overproduction in S. cerevisiae via increased Pho85p-dependent phosphorylation and degradation of Gcn4p
orf19.6443	1.96195	0.00787421		Predicted ORF in Assemblies 19, 20 and 21
orf19.7156	1.95134	0.00183585	FAA2-3	Predicted acyl CoA synthetase
orf19.2809	1.94531	0.0420343	CTN3	Predicted peroxisomal carnitine acetyl transferase; Ura+ deletion strain has no obvious metabolic, hyphal, or virulence defects; transcription induced by macrophage engulfment, hyphal growth, starvation, or nonfermentable carbon sources
orf19.3422	1.93053	0.0681975	FMP27	Predicted ORF in Assemblies 19, 20 and 21; fungal-specific (no human or murine homolog)
orf19.3601	1.93039	0.000269604		Predicted ORF in Assemblies 19, 20 and 21
orf19.851	1.9269	0.00557821		Protein of unknown function; transcription is negatively regulated by Rim101p
orf19.359	1.91626	0.00591519	GTT12	Predicted ORF in Assemblies 19, 20 and 21
orf19.2346	1.90565	0.00051697		Putative protein of unknown function, transcription is positively regulated by Tbf1p; predicted ORF in Assemblies 19, 20 and 21
orf19.1496	1.90364	0.00136782		Putative transcription factor with zinc finger DNA-binding motif; possibly spurious ORF (Annotation Working Group prediction)
orf19.6169.2	1.9003	0.278071		ORF Predicted by Annotation Working Group; fluconazole-downregulated; merged with orf19.2496 in Assembly 20
orf19.5132	1.88983	0.217299		Predicted ORF in Assemblies 19, 20 and 21
orf19.2529	1.87353	0.0998835		Predicted ORF in Assemblies 19, 20 and 21; shares similarity with human Pig-H, which is involved in glycosylphosphatidylinositol assembly
orf19.4263	1.86978	0.0365901		Predicted ORF in Assemblies 19, 20 and 21; possibly spurious ORF (Annotation Working Group prediction)
orf19.3488	1.86538	0.0086865		Predicted ORF from Assembly 19; merged with orf19.1985 in Assembly 20
orf19.3672	1.86431	0.0314986	GAL10	UDP-glucose 4-epimerase, required for galactose utilization; mutant shows cell wall defects and increased filamentation; fluconazole-induced; protein detected by mass spec in stationary phase cultures
orf19.1375	1.86397	0.000571722	LEU42	Putative alpha-isopropylmalate synthase; fungal-specific (no human/murine homolog); upregulated in the presence of human blood or polymorphonuclear cells; regulated by Gcn2p and Gcn4p; detected by mass spec in stationary phase cultures
orf19.3507	1.86352	0.00499517	MCR1	Protein described as NADH-cytochrome-b5 reductase; soluble protein in hyphae; biofilm induced; alkaline downregulated; ketoconazole or flucytosine induced, farnesol-induced
orf19.3793	1.85943	0.00198138		Predicted ORF in Assemblies 19, 20 and 21; regulated by Nrg1p; greater mRNA abundance observed in a cyr1 or ras1 homozygous null mutant than in wild type; possibly spurious ORF (Annotation Working Group prediction)
orf19.1150.1	1.85672	0.0126067		ORF Predicted by Annotation Working Group
orf19.4309	1.85642	8.91487e-05	GRP2	Similar to S. cerevisiae Gre2p (methylglyoxal reductase); antigenic in human; regulation associated with azole resistance; induced in core stress response or by oxidative stress (via Cap1p), fluphenazine, benomyl, or fluconazole (long term)
orf19.7030	1.85008	0.0232585	SSR1	Beta-glucan associated cell-wall protein with role in cell wall structure; S/T rich protein, GPI anchor; similar mRNA abundance in yeast-form and germ tube; detected at germ tube plasma membrane by mass spec; similar to S. cerevisiae Ssr1p
orf19.6930	1.84781	0.00745839	SOL1	Cell cycle regulator; partial functional homolog of S. cerevisiae Sic1p; protein degradation regulated by SCF(CDC4) pathway; CDK phosphorylation predicted; possibly spurious ORF (Annotation Working Group prediction)
orf19.4819	1.84336	0.0152796		Predicted ORF in Assemblies 19, 20 and 21
orf19.5811	1.83993	0.0719397	MET1	Putative uroporphyrin-3 C-methyltransferase; enzyme of methionine biosynthesis; upregulated in the presence of human whole blood or polymorphonuclear (PMN) cells; Hog1p-induced; fungal-specific (no human or murine homolog)
orf19.5025	1.82779	0.168658	MET3	Putative ATP sulfurlyase of sulfate assimilation; repressed by Met or Cys, Sfu1p, or in fluconazole-resistant isolate; strongly induced on biofilm formation, even in presence of Met and Cys; Hog1p-, caspofungin-, possibly adherence-induced
orf19.5215	1.82179	0.0615993	TES15	Predicted ORF in Assemblies 19, 20 and 21
orf19.5129	1.81629	0.0165726		Predicted ORF in Assemblies 19, 20 and 21
orf19.5312	1.81339	0.0452771		Predicted ORF in Assemblies 19, 20 and 21
orf19.5449	1.8126	0.0243768		Predicted ORF in Assemblies 19, 20 and 21
orf19.6173	1.81141	0.0862917	STD1	Protein described as transcription factor involved in control of glucose-regulated gene expression; repressed by Rgt1p
orf19.4041	1.81	0.0435989	PEX4	Predicted ORF in Assemblies 19, 20 and 21; transcription is upregulated in both intermediate and mature biofilms
orf19.3694	1.80904	0.00441263		Predicted ORF in Assemblies 19, 20 and 21
orf19.4114	1.80441	0.0421677	FAA2-1	Predicted long chain fatty acid CoA ligase; upregulated upon phagocytosis; induced by nitric oxide in yhb1 mutant
orf19.699	1.8001	0.0792548		Predicted ORF in Assemblies 19, 20 and 21
orf19.1709	1.79901	0.0157794		Predicted ORF in Assemblies 19, 20 and 21; alkaline downregulated; shows colony morphology-related gene regulation by Ssn6p
orf19.1424	1.79703	0.0500128		Predicted membrane transporter, member of the oxalate:formate antiporter (OFA) family, major facilitator superfamily (MFS)
orf19.5417	1.79398	0.0124688	DOT5	Alkaline downregulated
orf19.6763	1.78817	0.000759713	SLK19	Alkaline-induced protein of plasma membrane; affects cell aggregation, cell wall; similar to S. cerevisiae Slk19p (a kinetochore protein with roles in mitosis, meiosis); required for wild-type virulence in mouse; macrophage-downregulated
orf19.3228	1.78602	0.0482255		Predicted ORF in Assemblies 19, 20 and 21; mutation confers hypersensitivity to amphotericin B
orf19.1809	1.78106	0.0547692		Predicted 3-hydroxyacyl-CoA epimerase; upregulated upon phagocytosis; transcription is regulated by Mig1p; expression is regulated upon white-opaque switching; merged with orf19.1288 in Assembly 20
orf19.1246	1.77838	0.033899		Predicted ORF in Assemblies 19, 20 and 21; greater mRNA abundance observed in a cyr1 homozygous null mutant than in wild type
orf19.897	1.77745	0.130136		Predicted ORF in Assemblies 19, 20 and 21
orf19.1408	1.77601	0.02469		Predicted ORF from Assembly 19; merged with orf19.6116 in Assembly 20
orf19.1183	1.76885	0.00126055		Predicted ORF in Assemblies 19, 20 and 21
orf19.7434	1.75888	0.00963288	GLG2	Protein described as self-glucosylating initiator of glycogen synthesis; expression is regulated upon white-opaque switching; hyphal-induced
orf19.2030	1.75438	0.0204815		Predicted ORF in Assemblies 19, 20 and 21; greater mRNA abundance observed in a cyr1 or ras1 homozygous null mutant than in wild type
orf19.1150	1.75229	0.00638274		Predicted ORF in Assemblies 19, 20 and 21; regulated by Gcn2p and Gcn4p
orf19.5451	1.74996	0.0251776		ORF Predicted by Annotation Working Group
orf19.2125	1.74966	0.0126428		Predicted ORF in Assemblies 19, 20 and 21
orf19.1117	1.74788	0.0762529		Predicted ORF in Assemblies 19, 20 and 21; similar to Candida boidinii formate dehydrogenase; virulence-group-correlated expression
orf19.7648	1.74718	0.000636663		Predicted ORF in Assemblies 19, 20 and 21
orf19.2253	1.74199	0.0020899		Predicted ORF in Assemblies 19, 20 and 21; expression is regulated upon white-opaque switching; transcription is repressed in response to alpha pheromone in SpiderM medium
orf19.3518	1.73793	0.141943		Predicted ORF in Assemblies 19, 20 and 21
orf19.1760	1.73308	0.0854614	RAS1	RAS signal transduction GTPase; regulates cAMP and MAP kinase pathways; role in hyphal induction, virulence, apoptosis, heat-shock sensitivity; nonessential; glutamine-rich C terminus; complements viability of S. cerevisiae ras1 ras2 mutant
orf19.5921	1.73198	0.00581512		Predicted ORF in Assemblies 19, 20 and 21
orf19.7370	1.73196	0.00366138		Member of family of putative 7-transmembrane, PQ loop-family of G-protein-coupled receptors (GPCRs) similar to S. pombe Stm1p
orf19.1240	1.73103	0.000679508		Predicted ORF in Assemblies 19, 20 and 21; fungal-specific (no human or murine homolog)
orf19.1350	1.72661	0.0634227		Predicted ORF in Assemblies 19, 20 and 21
orf19.4099	1.72382	0.0957838	ECM17	Predicted enzyme of sulfur amino acid biosynthesis; putative role in regulation of cell wall biogenesis; upregulated in biofilm; possibly adherence-induced; regulated by Tsa1p, Tsa1Bp under H2O2 stress; Gcn4p-regulated; Tbf1p-activated
orf19.670.2	1.72304	0.0540022		ORF Predicted by Annotation Working Group
orf19.2833	1.72186	0.116708	PGA34	Putative GPI-anchored protein of unknown function; transcription is repressed in response to alpha pheromone in SpiderM medium
orf19.5270	1.71998	0.036852		Predicted ORF in Assemblies 19, 20 and 21
orf19.6311	1.7197	0.145245		Predicted ORF in Assemblies 19, 20 and 21
orf19.4976	1.71777	0.0261673		Predicted ORF in Assemblies 19, 20 and 21; possibly spurious ORF (Annotation Working Group prediction)
orf19.6844	1.71708	8.85639e-05	ICL1	Isocitrate lyase; enzyme of glyoxylate cycle; required for wild-type virulence in murine systemic infection; no mammalian homolog; gene induced upon phagocytosis by macrophage; farnesol regulated; Pex5p-dependent peroxisomal localization
orf19.2107.1	1.71496	0.251313	STF2	Protein involved in ATP biosynthesis; decreased expression in hyphae compared to yeast-form cells; downregulated by Efg1p; transcription is upregulated in clinical isolates from HIV+ patients with oral candidiasis
orf19.1593	1.7131	0.0137076		Protein not essential for viability; similar to S. cerevisiae Rim11p, which is a protein kinase involved in meiosis and sporulation; merged with orf19.791 in Assembly 20
orf19.4371	1.71028	0.000121903	TAL1	Predicted ORF in Assemblies 19, 20 and 21; biofilm induced; oxidative stress-induced via Cap1p; induced by nitric oxide in yhb1 mutant; protein detected by mass spec in exponential and stationary phase cultures
orf19.6899	1.707	0.425631		Predicted ORF in Assemblies 19, 20 and 21; mutation confers hypersensitivity to toxic ergosterol analog
orf19.338	1.70374	0.0619105		Predicted ORF in Assemblies 19, 20 and 21; Hog1p-downregulated; shows colony morphology-related gene regulation by Ssn6p; protein detected by mass spec in stationary phase cultures
orf19.1159	1.70215	0.00802641		Predicted ORF in Assemblies 19, 20 and 21; similar to A. nidulans CYSA serine O-trans-acetylase, suggesting that C. albicans uses an O-acetyl-serine (OAS) pathway of sulfur assimilation; induced upon biofilm formation
orf19.2863	1.70172	0.00137211		Predicted ORF in Assemblies 19, 20 and 21; possibly spurious ORF (Annotation Working Group prediction)
orf19.1852	1.70035	0.000721807		Predicted ORF in Assemblies 19, 20 and 21
orf19.4166	1.69749	0.027661		Predicted zinc-finger protein of unknown function
orf19.255	1.69379	0.00905549		Predicted zinc-cluster protein of unknown function; possibly transcriptionally regulated upon hyphal formation; intron in 5'-UTR
orf19.4076	1.69317	0.138002	MET10	Predicted enzyme of sulfur amino acid metabolism; biofilm-induced expression; upregulated in the presence of human whole blood or polymorphonuclear (PMN) cells; Hog1p-induced; possibly adherence-induced
orf19.3924	1.69288	0.138452		Predicted ORF in Assemblies 19, 20 and 21
orf19.5763	1.691	0.0077018		Predicted ORF in Assemblies 19, 20 and 21
orf19.1078	1.68596	0.00987573	HBR2	Uncharacterized protein, regulated by Gcn4p and hemoglobin; protein detected by mass spec in stationary phase cultures
orf19.3149	1.68361	0.0681994	LSP1	Predicted ORF in Assemblies 19, 20 and 21; caspofungin repressed; biofilm induced; fungal-specific (no human or murine homolog); protein detected by mass spec in exponential and stationary phase cultures
orf19.3171	1.68223	0.0468642	ACH1	Acetyl-coA hydrolase; acetate utilization; nonessential; soluble protein in hyphae; antigenic in human; induced on polystyrene adherence; farnesol-, ketoconazole-induced; no human or murine homolog
orf19.6083	1.68112	0.0614456		Predicted ORF in Assemblies 19, 20 and 21
orf19.6608	1.67967	0.19227		Predicted ORF in Assemblies 19, 20 and 21; downregulation correlates with clinical development of fluconazole resistance
orf19.1701	1.67854	0.000720084	RKI1	Predicted ORF in Assemblies 19, 20 and 21
orf19.7214	1.67437	0.119147		Similar to glucan 1,3-beta-glucosidase; regulated by Nrg1p, Tup1p; possibly regulated by Tac1p; induced upon biofilm formation; induced by nitric oxide; induced during cell wall regeneration; detected by mass spec in stationary phase
orf19.3311	1.66931	0.0298637	IFD3	Transcription is regulated by Mig1p
orf19.3469	1.66614	0.00296153		Predicted ORF in Assemblies 19, 20 and 21; greater mRNA abundance observed in a cyr1 homozygous null mutant than in wild type
orf19.899	1.66472	0.000422291		Predicted ORF in Assemblies 19, 20 and 21
orf19.4818	1.66368	0.0114794		Predicted ORF in Assemblies 19, 20 and 21
orf19.121	1.66135	0.01939	ARC18	Predicted ORF in Assemblies 19, 20 and 21; mutation confers hypersensitivity to cytochalasin D
orf19.1652	1.66042	0.000190166	POX1-3	Predicted acyl-CoA oxidase; farnesol regulated; protein detected by mass spec in stationary phase cultures
orf19.2296	1.66033	0.0206982		Predicted ORF in Assemblies 19, 20 and 21; similar to mucins; ketoconazole-induced; fluconazole-downregulated; greater mRNA abundance observed in a cyr1 homozygous null mutant than in wild type; colony morphology-related gene regulation by Ssn6p
orf19.6924	1.65953	0.051365	HTA1	Putative histone H2A; reduced mRNA abundance detected in homozygous fkh2 null mutant; amphotericin B repressed; farnesol regulated; RNA abundance regulated by tyrosol and cell density
orf19.64	1.65586	0.00887383		Predicted ORF from Assembly 19; removed from Assembly 20
orf19.4883	1.65556	0.0764216		Predicted ORF in Assemblies 19, 20 and 21; constitutive expression independent of MTL or white-opaque status
orf19.1450	1.65523	0.0551531		Predicted ORF in Assemblies 19, 20 and 21; possibly spurious ORF (Annotation Working Group prediction)
orf19.4555	1.65322	0.00111743	ALS4	ALS family protein; role in adhesion and wild-type germ tube induction; growth and temperature regulated; expressed during infection of human buccal epithelial cells; down-regulated upon vaginal contact; putative GPI-anchored
orf19.3893	1.6526	0.110132	SCW11	Cell wall protein; transcription is decreased in mutant lacking ACE2; downregulated in core caspofungin response; transcriptionally regulated by iron; expression greater in high iron
orf19.1985	1.65244	0.0474731		Predicted ORF in Assemblies 19, 20 and 21
orf19.2849	1.64564	0.00770198	AQY1	Aquaporin water channel; mutant has increased resistance to osmotic shock; required for wild-type tolerance of freezing; not required for virulence in a mouse model of systemic infection; flucytosine repressed
orf19.6731	1.64382	0.0314991		Predicted ORF in Assemblies 19, 20 and 21; transcription is repressed in response to alpha pheromone in SpiderM medium
orf19.38	1.64371	0.081735		Predicted ORF from Assembly 19; possibly spurious ORF (Annotation Working Group prediction); removed from Assembly 20
orf19.2724	1.64325	0.0546176		Predicted ORF in Assemblies 19, 20 and 21
orf19.1307	1.64319	0.00562546		Predicted ORF in Assemblies 19, 20 and 21
orf19.3512	1.64252	0.0701264		Predicted ORF in Assemblies 19, 20 and 21
orf19.5255	1.64095	0.158834	PXA2	Putative peroxisomal, half-size adrenoleukodystrophy protein (ALD or ALDp) subfamily ABC transporter; Gcn4p-regulated
orf19.3328	1.64008	0.0381511		Predicted ORF in Assemblies 19, 20 and 21; filament induced
orf19.541	1.63829	0.0274505		Predicted ORF in Assemblies 19, 20 and 21
orf19.5741	1.63686	0.25225	ALS1	Adhesin; ALS family of cell-surface glycoproteins; adhesion, virulence roles; immunoprotective; in band at hyphal base; amyloid domain; biofilm-induced; Rfg1p, Ssk1p, growth-regulated; strain background affects expression
orf19.671	1.63267	0.00121291	PSP1	Protein repressed during the mating process
orf19.6605	1.63261	0.0604564		Predicted ORF in Assemblies 19, 20 and 21
orf19.6888	1.62762	0.0203573		Protein with Gal4p-like DNA-binding domain; gene transcription regulated by Mig1p and Tup1p
orf19.1499	1.62716	0.0734477	CTF1	Putative zinc-finger transcription factor, similar to A. nidulans FarA and FarB; activates genes required for fatty acid degradation; induced by oleate; null mutant displays carbon source utilization defects and slightly reduced virulence
orf19.3825	1.62146	0.00238741	RCE1	Protein induced during the mating process
orf19.3981	1.6213	0.13166	MAL31	Putative protein of unknown function, transcription is upregulated in clinical isolates from HIV+ patients with oral candidiasis; alkaline upregulated
orf19.2532	1.61829	0.00215323	PRS	Putative prolyl-tRNA synthetase; monofunctional Class II synthetase; gene is constitutively expressed
orf19.6797	1.61668	0.00025196		Predicted ORF in Assemblies 19, 20 and 21
orf19.1168	1.6164	0.0882849		Predicted zinc-finger protein of unknown function
orf19.2758	1.61633	0.0140568	PGA38	Putative GPI-anchored protein of unknown function; repressed during cell wall regeneration
orf19.558	1.61378	0.0234178	GUT1	Protein described as glycerol kinase; downregulated upon adherence to polystyrene; greater mRNA abundance observed in a cyr1 homozygous null mutant than in wild type
orf19.3331	1.61193	0.000606897	ABC1	Protein described as ubiquinol-cytochrome-c reductase; induced upon adherence to polystyrene
orf19.5587	1.61094	0.241705		Putative protein of unknown function, transcription is upregulated in clinical isolates from HIV+ patients with oral candidiasis; predicted ORF in Assemblies 19, 20 and 21
orf19.3661	1.61084	0.00592505		Predicted ORF in Assemblies 19, 20 and 21; transcriptionally activated by Mnl1p under weak acid stress
orf19.385	1.60271	0.0798266	GCV2	Putative protein of glycine catabolism; downregulated by Efg1p; Hog1p-induced; upregulated by Rim101p at acid pH; transcription is activated in the presence of elevated CO2; protein detected by mass spec in stationary phase cultures
orf19.3678	1.59505	0.0197114		Protein not essential for viability
orf19.4655	1.59474	0.0539021	OPT6	Putative oligopeptide transporter; fungal-specific (no human or murine homolog); expression of OPT6, OPT7, or OPT8 does not suppress defect of mutant lacking Opt1p, Opt2p, and Opt3p; alleles are nonidentical
orf19.637	1.59373	0.017023	SDH2	Succinate dehydrogenase, Fe-S subunit; localizes to surface of yeast-form cells, but not hyphae; transcriptionally regulated by iron; expression greater in high iron; repressed by nitric oxide; induced during log phase (aerobic growth)
orf19.6192	1.59241	0.0116675		Predicted ORF in Assemblies 19, 20 and 21; Plc1p-regulated; possibly spurious ORF (Annotation Working Group prediction)
orf19.6059	1.58949	0.0137699	TTR1	Putative glutaredoxin; described as a glutathione reductase; upregulated in the presence of human neutrophils, and upon benomyl treatment; alkaline downregulated; regulated by Gcn2p and Gcn4p; required for virulence in mouse model
orf19.3427	1.58905	0.0113486		Predicted ORF in Assemblies 19, 20 and 21
orf19.5145	1.58674	0.0993995	SSP96	Predicted ORF in Assemblies 19, 20 and 21; has monooxygenase-like flavin-binding region; induced upon biofilm formation
orf19.7218	1.58604	0.122486	RBE1	Putative cell wall protein; transcription is negatively regulated by Rim101p, Efg1p, Ssn6p; alkaline downregulated; predicted signal sequence, O-glycosylation; no GPI anchor predicted
orf19.203	1.58599	0.0212249	STB3	Predicted ORF in Assemblies 19, 20 and 21; caspofungin induced; macrophage/pseudohyphal-repressed
orf19.2231	1.58434	0.0689932		Predicted ORF in Assemblies 19, 20 and 21
orf19.647.3	1.58204	0.0262468		ORF Predicted by Annotation Working Group
orf19.178	1.58177	0.0475466		Predicted ORF in Assemblies 19, 20 and 21
orf19.6492	1.58162	0.000900222		Predicted ORF in Assemblies 19, 20 and 21
orf19.3603	1.58157	0.0133281		Predicted ORF in Assemblies 19, 20 and 21
orf19.6082	1.58055	0.0144155		Predicted ORF in Assemblies 19, 20 and 21
orf19.6637	1.58051	0.0427954		Predicted ORF in Assemblies 19, 20 and 21
orf19.5097	1.57961	0.0422909	CAT8	Predicted zinc-cluster protein; null mutant shows a defect in transcription of JEN1 lactate permease gene; flucytosine repressed; similar to S. cerevisiae Cat8p but mutant phenotype suggests that it has a different set of target genes
orf19.2516	1.57938	0.00848515		Predicted ORF in Assemblies 19, 20 and 21
orf19.346	1.57805	0.0755003		Predicted ORF in Assemblies 19, 20 and 21; mutation confers hypersensitivity to 5-fluorocytosine (5-FC)
orf19.517	1.57604	0.0292925	HAP31	Protein described as a transcription factor that regulates CYC1; transcriptionally regulated by iron; expression greater in high iron
orf19.7021	1.57526	0.0438461	GPH1	Putative glycogen phosphorylase; gene regulated by Ssk1p, Mig1p, and Tup1p; fluconazole-induced; localizes to cell surface of hyphal cells, but not yeast-form cells; S. cerevisiae Gph1p is a stress-regulated protein of glycogen metabolism
orf19.6591	1.57526	0.00119886		Predicted ORF in Assemblies 19, 20 and 21
orf19.2765	1.57495	0.0558537	PGA62	Putative GPI-anchored protein; fluconazole-induced; transcriptionally regulated by iron; expression greater in high iron; induced during cell wall regeneration; Cyr1p or Ras1p downregulated; transcription is positively regulated by Tbf1p
orf19.6313.2	1.57267	0.180545		ORF Predicted by Annotation Working Group
orf19.1658	1.57167	0.0479437		Predicted ORF in Assemblies 19, 20 and 21
orf19.854	1.56958	0.0683053	UGA11	Predicted ORF in Assemblies 19, 20 and 21; macrophage-induced gene; overlaps orf19.854.1, which is a region annotated as a blocked reading frame
orf19.3434	1.5661	0.179345		Predicted ORF in Assemblies 19, 20 and 21
orf19.5943	1.56549	0.0021007		Predicted ORF in Assemblies 19, 20 and 21
orf19.7585	1.56383	0.204464	INO1	Inositol-1-phosphate synthase; enzyme of inositol biosynthesis; antigenic in human; repressed by farnesol (in biofilm) or caspofungin; regulated during planktonic growth; upstream inositol/choline regulatory element; glycosylation predicted
orf19.1608	1.56201	0.000900683		Predicted ORF in Assemblies 19, 20 and 21
orf19.677	1.56031	0.0303587	CHO1	Putative phosphatidylserine synthase; similar to S. cerevisiae Cho1p, which is involved in phosphatidylserine biosynthesis; transposon mutation affects filamentous growth; regulated by Nrg1p, Tup1p; no human or murine homolog
orf19.2172	1.56011	0.00071167	ARA1	D-Arabinose dehydrogenase; in dehydro-D-arabinono-1,4-lactone biosynthesis; NADP+ cofactor; active toward D-arabinose, L-fucose, L-xylose, L-galactose; inhibited by metal ions, thiol group-specific reagents; induced on polystyrene adherence
orf19.2461	1.55996	0.004157	PRN4	Protein with similarity to pirins; increased transcription is observed upon benomyl treatment
orf19.944	1.55825	0.0449062	IFG3	Putative D-amino acid oxidase
orf19.7131	1.55782	0.000359587		Butyrobetaine dioxygenase, the fourth enzyme of the carnitine biosynthesis pathway
orf19.997	1.55679	0.0224954		Predicted ORF in Assemblies 19, 20 and 21
orf19.4082	1.55615	0.000293286	DDR48	Immunogenic stress-associated protein; regulated by filamentous growth pathways; induced by benomyl, caspofungin, or in azole-resistant strain; Hog1p, farnesol, alkaline downregulated; similar to S. cerevisiae Ddr48p
orf19.2726	1.55505	0.211133		Predicted ORF in Assemblies 19, 20 and 21; Plc1p-regulated
orf19.6249	1.55457	0.347375	HAK1	Putative potassium transporter; similar to Schwanniomyces occidentalis Hak1p; amphotericin B induced; transcriptionally induced upon phagocytosis by macrophage
orf19.4506	1.55332	0.0284303	LYS22	Putative homocitrate synthase; fungal-specific (no human or murine homolog); repressed by nitric oxide; protein level decreased in stationary phase cultures
orf19.2459	1.55307	0.00349043		Predicted ORF in Assemblies 19, 20 and 21
orf19.7345	1.55102	0.211326		Predicted ORF in Assemblies 19, 20 and 21
orf19.6828.1	1.54781	0.0870643		ORF Predicted by Annotation Working Group
orf19.1370	1.5475	0.397966		Predicted ORF in Assemblies 19, 20 and 21; expression is regulated upon white-opaque switching; transcription is repressed in response to alpha pheromone in SpiderM medium
orf19.4121	1.54559	0.230074		Predicted ORF in Assemblies 19, 20 and 21
orf19.2887	1.54532	0.0940697	MET13	Predicted ORF in Assemblies 19, 20 and 21; ketoconazole-induced; amphotericin B repressed
orf19.1043	1.54386	0.0454075		Predicted ORF in Assemblies 19, 20 and 21
orf19.6998	1.54335	0.00639549	GTT1	Protein described as glutathione S-transferase; downregulated upon adherence to polystyrene; regulated upon white-opaque switching; induced in the presence of human neutrophils; oxidative stress-induced via Cap1p; regulated by Gcn2p, Gcn4p
orf19.5723	1.54061	0.122015	POX1	Predicted acyl-CoA oxidase; expression is regulated upon white-opaque switching; upregulated upon phagocytosis
orf19.6196	1.53939	0.0145192		Predicted ORF in Assemblies 19, 20 and 21; possibly spurious ORF (Annotation Working Group prediction)
orf19.2686	1.53768	0.0589416		Predicted ORF in Assemblies 19, 20 and 21
orf19.6925	1.53642	0.0644536	HTB1	Putative histone H2B; induced upon adherence to polystyrene; amphotericin B or caspofungin repressed; flucytosine or fluconazole induced; regulated by Efg1p; slow growth, increased white-to opaque switching in ectopic expression strains
orf19.3751	1.53541	0.00551524		Predicted ORF in Assemblies 19, 20 and 21
orf19.7437	1.53268	0.161166		Predicted ORF in Assemblies 19, 20 and 21
orf19.2076	1.53156	0.00296843		Predicted ORF in Assemblies 19, 20 and 21
orf19.6143	1.53073	0.0462603		Predicted ORF in Assemblies 19, 20 and 21
orf19.6554	1.52827	0.0339835		Predicted ORF in Assemblies 19, 20 and 21
orf19.1111	1.52669	0.104995		Predicted ORF in Assemblies 19, 20 and 21
orf19.4756	1.52284	0.002398		Predicted ORF in Assemblies 19, 20 and 21; fungal-specific
orf19.2092	1.52194	0.0266293		Predicted ORF in Assemblies 19, 20 and 21; Gcn4p-regulated
orf19.4942	1.51805	0.120701		Predicted ORF in Assemblies 19, 20 and 21
orf19.2457	1.51759	0.0241487		Predicted ORF in Assemblies 19, 20 and 21
orf19.3743	1.5175	0.270081		Predicted ORF in Assemblies 19, 20 and 21
orf19.5450	1.51466	0.000930443		Predicted ORF in Assemblies 19, 20 and 21; protein detected by mass spec in exponential and stationary phase cultures
orf19.3613	1.51185	0.0489311		Predicted ORF in Assemblies 19, 20 and 21
orf19.5731	1.51167	1.43842e-05	PAD1	Protein described as phenylacrylic acid decarboxylase; repressed by Rgt1p
orf19.6713	1.50895	0.0988663		Predicted ORF in Assemblies 19, 20 and 21
orf19.5158	1.50863	0.0948177		Protein with slight similarity to a human gene associated with colon cancer and to orf19.5158; regulated by Gcn4p, Cyr1p; induced in response to amino acid starvation (3-aminotriazole treatment); macrophage-induced protein, macrophage-downregulated gene
orf19.5339	1.50645	0.00695352		Predicted ORF in Assemblies 19, 20 and 21
orf19.4157	1.50235	0.0266951	SPS20	Predicted ORF in Assemblies 19, 20 and 21; protein detected by mass spec in stationary phase cultures
orf19.1855	1.50036	0.123135		Predicted membrane transporter, member of the anion:cation symporter (ACS) family, major facilitator superfamily (MFS); Gcn4p-regulated; flucytosine induced; ketoconazole-repressed; oxidative stress-induced via Cap1p
orf19.6771	1.49926	0.0356913	UBI4	Ubiquitin precursor (polyubiquitin), contains three tandem repeats of the ubiquitin peptide that are processed to individual units; transcription is induced by stress; mRNA found in yeast-form and mycelial cells at similar abundance
orf19.4565	1.49922	0.0715591	BGL2	1,3-beta-Glucosyltransferase, cell wall enzyme; one of multiple 1,3-beta-glucosyltransferases; mutant has cell-wall and growth defects, but wild-type 1,3- or 1,6-beta-glucan content; antigenic; virulence role in mouse systemic infection
orf19.5036	1.49902	0.179468		Predicted ORF from Assembly 19; merged with orf19.1297 in Assembly 20
orf19.5650	1.49807	0.0628635	PRO3	Protein induced during the mating process; alkaline upregulated
orf19.7242	1.49663	0.123955	NCR1	Transcription is regulated by Nrg1p and Mig1p; increased expression in response to prostaglandins
orf19.4754	1.49652	0.0285053	ZWF1	Putative glucose-6-phosphate dehydrogenase; antigenic in murine infection; activity induced by O2 or oxidizing agents H2O2 or menadione; caspofungin repressed; macrophage induced; induced in core stress response; regulated by Gcn2p, Gcn4p
orf19.243	1.49634	0.0408868	OXR1	Predicted ORF in Assemblies 19, 20 and 21
orf19.6305	1.49532	0.00750383		Hydroxytrimethyllysine aldolase, the second enzyme in the carnitine biosynthesis pathway
orf19.4450	1.49406	0.0872712		Predicted zinc-finger protein of unknown function
orf19.3629	1.4933	0.0502712	DSE1	Predicted cell wall protein; transcription is decreased in mutant lacking ACE2; periodic mRNA expression, peak at cell-cycle M/G1 phase
orf19.227	1.49156	0.0966876	COX7	Predicted ORF in Assemblies 19, 20 and 21; flucytosine induced; repressed by nitric oxide
orf19.4490.2	1.48916	0.186447	QCR8	ORF Predicted by Annotation Working Group; shows colony morphology-related gene regulation by Ssn6p; macrophage/pseudohyphal-induced
orf19.3675	1.48638	0.0655484	GAL7	Predicted ORF in Assemblies 19, 20 and 21; macrophage/pseudohyphal-repressed
orf19.4903	1.48512	0.0016342		Predicted ORF in Assemblies 19, 20 and 21
orf19.2168.3	1.48496	0.00308435		ORF Predicted by Annotation Working Group
orf19.4927	1.48489	0.091433	BNI1	Formin; role in cytoskeletal organization, cell polarity; role in systemic virulence in mouse; cell-cycle regulated localization to site of polarized growth, bud neck; localizes to Spitzenkorper of hyphae, minor localization at septum
orf19.6548	1.48459	0.0295899	ISU1	Protein with similarity to NifU; possible role in iron-sulfur cluster biogenesis; transcriptionally regulated by iron; expression greater in low iron; transcription is upregulated in both intermediate and mature biofilms
orf19.5962	1.48323	0.00669988	SNF3	Glucose and galactose sensor; fermentation, filamentation, virulence roles; in 20-member C. albicans glucose transporter family, extended C terminus; high-glucose repressed; induced in macrophage, repressed in biofilm
orf19.3573	1.48208	0.208275		Predicted ORF in Assemblies 19, 20 and 21
orf19.4090.1	1.48187	0.061845		ORF Predicted by Annotation Working Group
orf19.1186	1.48074	0.000119397		Predicted ORF in Assemblies 19, 20 and 21; possibly spurious ORF (Annotation Working Group prediction)
orf19.5030	1.48023	0.0223682		Predicted ORF in Assemblies 19, 20 and 21; induced during planktonic growth
orf19.905	1.48014	0.00892274	AVT7	Predicted ORF in Assemblies 19, 20 and 21; similar to S. cerevisiae Avt7p; downregulated upon adherence to polystyrene; constitutive expression independent of MTL or white-opaque status
orf19.4269	1.47841	0.0397222		Predicted ORF in Assemblies 19, 20 and 21
orf19.5773	1.47787	0.00750113		Predicted ORF in Assemblies 19, 20 and 21; Hog1p-induced; clade-associated gene expression; protein detected by mass spec in exponential and stationary phase cultures
orf19.6796	1.47768	0.0994941		Predicted ORF in Assemblies 19, 20 and 21
orf19.4607	1.47766	0.145731		Predicted ORF in Assemblies 19, 20 and 21; hyphal induced
orf19.6003	1.47721	0.0238551		Predicted ORF in Assemblies 19, 20 and 21
orf19.6805	1.47695	0.0650876		Predicted ORF in Assemblies 19, 20 and 21
orf19.4749	1.47686	0.00686031		Predicted ORF in Assemblies 19, 20 and 21; hyphal-induced expression, regulated by Cyr1p, Ras1p, Efg1p
orf19.4426	1.47681	0.00834422	PEX3	Putative peroxisomal protein involved in targeting proteins into peroxisomes
orf19.2121	1.47592	9.70337e-05		Predicted ORF from Assembly 19; merged with orf19.1097 in Assembly 20
orf19.3508	1.47565	0.192791		Predicted ORF in Assemblies 19, 20 and 21; protein detected by mass spec in stationary phase cultures
orf19.7554	1.47379	0.0334788		Putative transporter; slightly similar to the Sit1p siderophore transporter; induced by nitric oxide in yhb1 mutant
orf19.7635	1.47377	0.0910041	DRS1	Predicted ORF in Assemblies 19, 20 and 21; mutation confers hypersensitivity to 5-fluorouracil (5-FU), tubercidin (7-deazaadenosine); transcription is positively regulated by Tbf1p; downregulated during core stress response
orf19.2280	1.47121	0.0800089		Putative transcription factor with zinc cluster DNA-binding motif
orf19.2117	1.46964	0.139557	LEU5	Predicted ORF in Assemblies 19, 20 and 21; transcription is upregulated in both intermediate and mature biofilms
orf19.2633	1.46924	0.0198597	HGT14	Putative glucose transporter of the major facilitator superfamily; the C. albicans glucose transporter family comprises 20 members; 12 probable membrane-spanning segments; expressed in rich medium with 2% glucose
orf19.4362	1.46805	0.296678		Predicted ORF in Assemblies 19, 20 and 21
orf19.1444	1.46783	0.0053583		Predicted ORF in Assemblies 19, 20 and 21
orf19.1287	1.46781	0.212737		Predicted ORF in Assemblies 19, 20 and 21; possibly spurious ORF (Annotation Working Group prediction)
orf19.7093	1.46592	0.179136	HGT13	Predicted sugar transporter, involved in glycerol utilization; member of the major facilitator superfamily; 12 transmembrane; gene has intron; oxidative stress-induced via Cap1p; expressed in rich medium, 2% glucose
orf19.4771	1.46444	0.215554		Predicted ORF in Assemblies 19, 20 and 21
orf19.6830	1.46393	0.0950362		Putative enoyl-CoA hydratase
orf19.1325	1.46343	0.0640049	ECM38	Alkaline upregulated
orf19.1830	1.46152	0.314463		Predicted ORF in Assemblies 19, 20 and 21
orf19.4629	1.46013	0.0270955		Predicted ORF in Assemblies 19, 20 and 21
orf19.5058	1.45845	0.172861	SMI1	Decreased mRNA abundance observed in cyr1 homozygous null mutant hyphal cells; caspofungin repressed
orf19.1562	1.45809	0.0428138		Predicted ORF in Assemblies 19, 20 and 21; transcription is repressed in response to alpha pheromone in SpiderM medium
orf19.5611	1.4567	0.0166086		Predicted ORF in Assemblies 19, 20 and 21
orf19.6912	1.45647	0.0779079		Putative ethanolamine kinase
orf19.4623.3	1.45557	0.078807	NHP6A	Protein described as nonhistone chromatin component; RNA abundance regulated by tyrosol and cell density; amphotericin B, caspofungin repressed; intron in 5'-UTR
orf19.4370	1.4553	0.0249101		Predicted ORF in Assemblies 19, 20 and 21; induced by nitric oxide; oxidative stress-induced via Cap1p; fungal-specific (no human or murine homolog)
orf19.75	1.45493	0.256246		Predicted exocyst component; ortholog of S. cerevisiae Sec5p; merged with orf19.74 in Assembly 21
orf19.3181.1	1.45345	0.0255671		ORF Predicted by Annotation Working Group
orf19.3742	1.45298	0.382444		Predicted ORF in Assemblies 19, 20 and 21; expression regulated during planktonic growth; greater mRNA abundance observed in a cyr1 homozygous null mutant than in wild type; possibly spurious ORF (Annotation Working Group prediction)
orf19.242.2	1.45274	0.20552		ORF Predicted by Annotation Working Group
orf19.7051	1.44982	0.00143434		Predicted ORF in Assemblies 19, 20 and 21
orf19.4356	1.44814	0.249657	HGT3	Putative glucose transporter of the major facilitator superfamily; the C. albicans glucose transporter family comprises 20 members; 12 probable membrane-spanning segments, extended C terminus; expressed in rich medium with 2% glucose
orf19.7356	1.44741	0.0168027		Predicted ORF in Assemblies 19, 20 and 21; possibly spurious ORF (Annotation Working Group prediction)
orf19.2446	1.44699	0.00546639		Predicted ORF in Assemblies 19, 20 and 21
orf19.7140	1.44598	5.43025e-05		Putative protein of unknown function, transcription is upregulated in clinical isolates from HIV+ patients with oral candidiasis; predicted ORF in Assemblies 19, 20 and 21; protein detected by mass spec in stationary phase cultures
orf19.7414	1.44447	0.00306845	ALS6	ALS family protein; expression in S. cerevisiae confers adhesion to gelatin; macrophage-induced gene; N-terminal adhesion domain; ALS family includes cell-surface glycoproteins, some with adhesin function
orf19.3687	1.44421	0.00171256		Predicted ORF in Assemblies 19, 20 and 21
orf19.3226	1.44281	0.1618		Predicted ORF in Assemblies 19, 20 and 21
orf19.7118	1.44273	0.260711		Predicted ORF in Assemblies 19, 20 and 21
orf19.1907	1.44241	0.201166	EMC9	Protein not essential for viability, induced during the mating process
orf19.7564	1.44229	0.0925426	DPB2	Probable subunit of DNA polymerase II (DNA polymerase epsilon), similar to S. cerevisiae Dpb2p; essential for viability
orf19.3430	1.44184	0.0467568		Predicted ORF in Assemblies 19, 20 and 21; possibly spurious ORF (Annotation Working Group prediction); physically interacts with TAP-tagged Nop1p
orf19.3757	1.44115	0.0459829	ATP20	Predicted ORF in Assemblies 19, 20 and 21; shows colony morphology-related gene regulation by Ssn6p; flucytosine induced; caspofungin repressed; macrophage/pseudohyphal-induced
orf19.405	1.44092	0.00920935	VCX1	Putative H+/Ca2+ antiporter; fungal-specific (no human or murine homolog)
orf19.732	1.44066	0.0555615		Predicted ORF in Assemblies 19, 20 and 21; transcription is upregulated in both intermediate and mature biofilms
orf19.6877	1.44028	0.0106747		Predicted ORF in Assemblies 19, 20 and 21; transcription is upregulated in response to treatment with caspofungin, ciclopirox olamine or ketoconazole; gene of core caspofungin response
orf19.3568	1.43993	0.0720525	RXT3	Predicted ORF in Assemblies 19, 20 and 21
orf19.3213	1.43941	0.258503		Predicted ORF in Assemblies 19, 20 and 21
orf19.7306	1.4381	0.020174		Protein of aldo-keto reductase family; increased transcription associated with MDR1 overexpression, benomyl or long-term fluconazole treatment; overexpression does not affect drug or oxidative stress sensitivity
orf19.5286	1.43766	0.110327	YCP4	Putative flavodoxin; fungal-specific (no human or murine homolog)
orf19.6147	1.43734	0.254781		Predicted ORF in Assemblies 19, 20 and 21
orf19.6871	1.43618	0.113581		Predicted ORF in Assemblies 19, 20 and 21
orf19.2458	1.43584	0.00932419		Putative transcription factor with zinc finger DNA-binding motif
orf19.4669	1.43493	0.233273	AAT22	Protein not essential for viability; similar to S. cerevisiae Aat2p, which is an aspartate aminotransferase involved in nitrogen metabolism; clade-associated gene expression; protein level decreased in stationary phase cultures
orf19.876	1.43396	0.0109557	PGA33	Putative GPI-anchored protein of unknown function; possibly spurious ORF (Annotation Working Group prediction)
orf19.1979	1.43392	0.00770539	GIT1	Putative glycerophosphoinositol permease; fungal-specific (no human or murine homolog); alkaline downregulated; transcription is specific to white cell type; caspofungin repressed; macrophage/pseudohyphal-repressed
orf19.2170	1.43347	0.00160689	PHM7	Putative transporter; fungal-specific (no human or murine homolog); Hog1p-downregulated; downregulated in response to 17-beta-estradiol, ethynyl estradiol
orf19.6979	1.43305	0.0252612		Predicted ORF in Assemblies 19, 20 and 21; intron in 5'-UTR
orf19.6092	1.43088	0.0104055	KEL1	Protein containing a Kelch repeat domain, similar to S. cerevisiae Kel1p; not required for adherence to buccal epithelial cells or virulence in mouse systemic infection; null mutant colonies exhibit slightly decreased filamentation ratio
orf19.3517	1.42892	0.0818168		Predicted ORF in Assemblies 19, 20 and 21
orf19.7547	1.42888	0.0338491		Predicted ORF in Assemblies 19, 20 and 21
orf19.5635	1.42878	0.00106469	PGA7	Protein described as a putative precursor of a hyphal surface antigen; putative GPI-anchor; induced by ciclopirox olamine, ketoconazole, or by Rim101p at pH 8; regulated during planktonic growth; induced during cell wall regeneration
orf19.4821	1.4272	0.175441	LIP1	Secreted lipase, member of a lipase gene family whose members are expressed differentially in response to carbon source and during infection; may have a role in nutrition and/or in creating an acidic microenvironment
orf19.4857	1.42616	0.114859		Predicted ORF in Assemblies 19, 20 and 21
orf19.7319	1.42612	0.0276134	SUC1	Putative transcriptional regulator with N-terminal zinc finger; regulates alpha-glucosidase in C. albicans and S. cerevisiae; in S. cerevisiae, complements suc2 mutant sucrose utilization defect and mal13 mutant maltase defect
orf19.6976	1.42527	0.0440849		Predicted membrane transporter; member of the proton coupled folate transporter/heme carrier protein (PCFT/HCP) family, major facilitator superfamily (MFS); virulence-group-correlated expression
orf19.2244	1.42504	0.195302		Similar to oxidoreductases and to S. cerevisiae Yjr096wp; transcription is negatively regulated by Sfu1p; increased transcription is observed upon benomyl treatment; decreased expression observed in an ssr1 homozygous null mutant
orf19.7359	1.42467	0.0151745	CRZ1	Putative transcription factor; similar to S. cerevisiae calcineurin-regulated transcription factor Crz1p; mutant is fluconazole hypersensitive; likely to act downstream of calcineurin; has C2H2 zinc fingers; not required for mouse virulence
orf19.2262	1.42349	0.202067		Predicted ORF in Assemblies 19, 20 and 21; similar to quinone oxidoreductases; increased transcription is observed upon benomyl treatment; induced by nitric oxide; oxidative stress-induced via Cap1p
orf19.1806	1.42346	0.0124165		Predicted ORF in Assemblies 19, 20 and 21; possibly spurious ORF (Annotation Working Group prediction)
orf19.5070	1.42046	0.0813522		Predicted ORF in Assemblies 19, 20 and 21; transcriptionally regulated by iron; expression greater in low iron; similar to cell-wall mannoproteins; greater mRNA abundance observed in a cyr1 homozygous null mutant than in wild type; regulated by osmotic and oxidative stress via Hog1p; possibly spurious ORF (Annotation Working Group prediction)
orf19.3151	1.42018	0.0095207		Predicted ORF in Assemblies 19, 20 and 21
orf19.6460	1.41738	0.0858204		Predicted ORF in Assemblies 19, 20 and 21
orf19.5293	1.41724	0.34234		Predicted ORF in Assemblies 19, 20 and 21
orf19.5130	1.41708	0.0186126	PDI1	Protein described as protein disulfide-isomerase; antigenic in human; soluble protein in hyphae; transcription is induced upon filamentous growth
orf19.3823	1.41672	0.00287081	ZDS1	Nonessential protein; similar to S. cerevisiae Zds1p
orf19.1935	1.41667	0.053102		Predicted ORF in Assemblies 19, 20 and 21; possibly spurious ORF (Annotation Working Group prediction)
orf19.6596	1.41603	0.1224		Protein of unknown function; possibly transcriptionally regulated by Tac1p; transcriptionally activated by Mnl1p under weak acid stress; protein detected by mass spec in exponential and stationary phase cultures
orf19.5180	1.4154	0.14424	PRX1	Protein described as a putative cysteine peroxidase; transcriptionally induced by interaction with macrophage; fluconazole induced; Fkh2p-downregulated; caspofungin repressed
orf19.2210	1.41463	0.0381889		Predicted ORF in Assemblies 19, 20 and 21
orf19.2199	1.4144	0.0213569	PHO86	Predicted ORF in Assemblies 19, 20 and 21; possibly adherence-induced
orf19.3501	1.41403	0.032928		Predicted ORF in Assemblies 19, 20 and 21; Hog1p-downregulated
orf19.2533.1	1.41379	0.0275493		ORF Predicted by Annotation Working Group
orf19.3644	1.41376	0.0468146		Predicted ORF in Assemblies 19, 20 and 21; greater mRNA abundance observed in a cyr1 homozygous null mutant than in wild type
orf19.2284	1.41332	0.184069		Predicted ORF in Assemblies 19, 20 and 21
orf19.7611	1.41254	0.0243576	TRX1	Similar to thioredoxin; biofilm, benomyl, flucytosine, peroxide induced; amphotericin B, caspofungin repressed; upregulated in the presence of human neutrophils; macrophage-downregulated gene
orf19.4993	1.41236	0.230227	SEC18	Functional homolog of S. cerevisiae Sec18p, which acts in protein transport; conserved ATP binding site; not glycosylated
orf19.3322	1.41176	0.0465296	DUT1	dUTP pyrophosphatase; converts dUTP to dUMP and pyrophosphate; cell-cycle regulated if expressed in S. cerevisiae; upstream MluI and SCB transcription regulatory elements; induced by 17-beta-estradiol, ethynyl estradiol, macrophage
orf19.5026	1.41154	0.203398		Putative transcription factor with zinc finger DNA-binding motif
orf19.7046	1.41088	0.337272	MET28	Protein induced during the mating process
orf19.5467	1.40939	0.203399	TLO7	Member of a family of telomere-proximal genes of unknown function; may be spliced in vivo
orf19.1274	1.40888	0.0234191		Predicted ORF in Assemblies 19, 20 and 21
orf19.5513	1.40833	0.00230471		Predicted ORF in Assemblies 19, 20 and 21
orf19.1675	1.40717	0.053865		Predicted ORF in Assemblies 19, 20 and 21
orf19.6214	1.40628	0.130739	ATC1	Cell wall acid trehalase; catalyzes hydrolysis of the disaccharide trehalose; similar to S. cerevisiae vacuolar acid trehalase (Ath1p)
orf19.1944	1.40613	5.77387e-05	GPR1	Putative G-protein-coupled receptor of plasma membrane; required for wild-type hyphal growth; acts in cAMP-PKA pathway; reports differ on role in cAMP-mediated glucose signaling; Gpr1p C terminus binds Gpa2p; regulates HWP1 and ECE1
orf19.3670	1.4056	0.194543	GAL1	Galactokinase; transcription regulated by galactose; transcription regulated by Mig1p and Tup1p; not required for systemic mouse virulence; farnesol-downregulated in biofilm; fluconazole-induced
orf19.3936	1.40322	0.0615732		Predicted ORF in Assemblies 19, 20 and 21; mutation confers hypersensitivity to 5-fluorouracil (5-FU); induced upon biofilm formation
orf19.2331	1.40235	0.0178217	ADA2	Putative transcriptional coactivator; cell wall integrity role; required for wild-type transcriptional response to caspofungin; mutant is caspofungin hypersensitive; role in regulation with Cas5p; zinc finger DNA-binding motif
orf19.4110	1.40218	0.00199101		Predicted ORF in Assemblies 19, 20 and 21
orf19.2439.1	1.40158	0.013181		ORF Predicted by Annotation Working Group
orf19.6018	1.40157	0.00134757	LRO1	Predicted ORF in Assemblies 19, 20 and 21; nonessential; similar to S. cerevisiae Lro1p acyltransferase
orf19.5213.1	1.40126	0.0783986	COX8	ORF Predicted by Annotation Working Group; flucytosine induced; caspofungin repressed
orf19.1710	1.39977	0.0390877		Protein described as NADH-ubiquinone oxidoreductase; identified in detergent-resistant membrane fraction (possible lipid raft component); predicted N-terminal acetylation; repressed by nitric oxide
orf19.1901	1.39969	0.12992	MCM3	Predicted ORF in Assemblies 19, 20 and 21; periodic mRNA expression, peak at cell-cycle M/G1 phase
orf19.4390	1.39928	0.0156309		Predicted ORF in Assemblies 19, 20 and 21; transcription is repressed in response to alpha pheromone in SpiderM medium; transcriptionally activated by Mnl1p under weak acid stress
orf19.6325.1	1.39925	0.31941		ORF Predicted by Annotation Working Group
orf19.5701	1.3991	0.0276779		Predicted ORF in Assemblies 19, 20 and 21
orf19.3984	1.39881	0.000376806		Predicted ORF in Assemblies 19, 20 and 21; induced in core caspofungin response; increased expression observed in an ssr1 homozygous null mutant; induced by nitric oxide in yhb1 mutant
orf19.1777	1.39868	0.0427815		Predicted ORF in Assemblies 19, 20 and 21
orf19.6264	1.395	0.0245703		Predicted ORF in Assemblies 19, 20 and 21; possibly spurious ORF (Annotation Working Group prediction)
orf19.3470	1.39397	0.212259		Putative flavodoxin; similar to S. cerevisiae Ypl207p; predicted Kex2p substrate
orf19.2881	1.39386	0.171519	MNN4	Protein required for normal mannosylphosphorylation of oligosaccharides linked to cell wall proteins, not required for virulence or kidney colonization in mouse systemic infection or for normal interaction with macrophages
orf19.999	1.39343	0.105414	GCA2	Predicted extracellular glucoamylase, promotes biofilm matrix formation
orf19.782	1.39336	0.0154642		Predicted ORF in Assemblies 19, 20 and 21
orf19.6053	1.39326	0.179699	CIS2	Putative role in regulation of biogenesis of the cell wall; upregulated in biofilm; Gcn4p-regulated
orf19.7593	1.39291	0.0134896		Predicted ORF in Assemblies 19, 20 and 21
orf19.1600	1.39135	0.0692724		Predicted ORF in Assemblies 19, 20 and 21
orf19.2891	1.39052	0.0267189		Predicted ORF in Assemblies 19, 20 and 21
orf19.2114	1.39022	0.126739		Predicted ORF in Assemblies 19, 20 and 21
orf19.4090	1.39017	0.00439486		Predicted membrane transporter, member of the fucose:proton symporter (FHS) family, major facilitator superfamily (MFS)
orf19.6737	1.3901	0.141977		Protein not essential for viability; greater mRNA abundance observed in a cyr1, ras1, or efg1 homozygous null mutant than in wild type; possibly spurious ORF (Annotation Working Group prediction)
orf19.6084	1.3893	0.00345083		Predicted ORF in Assemblies 19, 20 and 21
orf19.6789	1.38915	0.00373152		Predicted ORF in Assemblies 19, 20 and 21
orf19.4827	1.38874	0.00489869	ADE12	Predicted enzyme of adenine biosynthesis; upregulated in biofilm; decreased expression in hyphae compared to yeast-form cells; not induced during GCN response, in contrast to the S. cerevisiae ortholog, which is induced by Gcn4p
orf19.6344	1.38797	0.0312024	RBK1	Protein not essential for viability; similar to S. cerevisiae Rbk1p, which is a ribokinase
orf19.425	1.38769	0.0530203		Protein not essential for viability
orf19.7204	1.38752	0.188068		Predicted ORF in Assemblies 19, 20 and 21
orf19.1369	1.38685	0.14048		Predicted ORF in Assemblies 19, 20 and 21
orf19.5502	1.38644	0.0862818		Predicted ORF in Assemblies 19, 20 and 21; possibly spurious ORF (Annotation Working Group prediction)
orf19.516	1.38602	0.0428641		Predicted ORF in Assemblies 19, 20 and 21
orf19.4666	1.38548	0.243059		Predicted ORF in Assemblies 19, 20 and 21; hyphal-induced expression, regulated by Cyr1p, Ras1p, Efg1p; possibly spurious ORF (Annotation Working Group prediction)
orf19.3605	1.38397	0.194493		Predicted ORF in Assemblies 19, 20 and 21
orf19.6435	1.38298	0.11851		Predicted ORF in Assemblies 19, 20 and 21
orf19.4354	1.38066	0.00472606	MCM2	Phosphorylated protein of unknown function; transcription is periodic with a peak at M/G1 phase of the cell cycle; predicted ORF in Assemblies 19, 20 and 21
orf19.1149	1.38053	0.0102148	MRF1	Protein similar to mitochondrial respiratory proteins; increased transcription observed upon benomyl treatment; induced by farnesol, nitric oxide, core stress response; oxidative stress-induced via Cap1p
orf19.5751	1.38049	0.0662352	ORM1	Predicted ORF in Assemblies 19, 20 and 21; mutation confers hypersensitivity to aureobasidin A
orf19.92	1.3804	0.200907		Predicted ORF in Assemblies 19, 20 and 21; increased expression in response to prostaglandins
orf19.6220.3	1.3795	0.0909372	MMD1	ORF Predicted by Annotation Working Group; macrophage-downregulated protein abundance
orf19.4600.1	1.37864	0.00283353		ORF Predicted by Annotation Working Group
orf19.5961	1.37778	0.00339019		Predicted ORF in Assemblies 19, 20 and 21; described as similar to S. cerevisiae Nas6p proteasome component; induced upon adherence to polystyrene; regulated by Gcn2p and Gcn4p
orf19.3922	1.37775	0.0115298		Predicted ORF in Assemblies 19, 20 and 21; protein detected by mass spec in exponential and stationary phase cultures
orf19.1493	1.37721	0.00700476	RAD7	Protein similar to S. cerevisiae Rad7p, which is a subunit of the Nucleotide Excision Repair Factor 4; induced under hydroxyurea treatment
orf19.6135.1	1.37704	0.180216	SMX4	ORF Predicted by Annotation Working Group; flucytosine induced
orf19.6049	1.37623	0.0323848		Predicted ORF in Assemblies 19, 20 and 21
orf19.4549	1.37562	0.520138	FGR38	Protein lacking an ortholog in S. cerevisiae; member of a family of related proteins; transposon mutation affects filamentous growth; macrophage-induced gene
orf19.5170	1.37452	0.0712073	ENA21	Predicted ORF similar to S. cerevisiae sodium transporters Ena1p and Ena5p; Gcn4p-regulated; flucytosine, amphotericin B, or ketoconazole-induced; osmotic stress-induced; overlaps orf19.5170.1, which is annotated as a blocked reading frame
orf19.2763	1.37237	0.26211		Protein not essential for viability; orf19.10279 possibly transcriptionally regulated upon hyphal formation
orf19.7510	1.37189	0.000216909	KIN2	Putative protein of with similarity to S. cerevisiae Kin2p, transcription is positively regulated by Tbf1; predicted ORF in Assemblies 19, 20 and 21
orf19.4735	1.37167	0.095615		Predicted ORF in Assemblies 19, 20 and 21
orf19.6725	1.37134	0.0294423		Protein described as similar to fumarate hydratase, enzyme of citric acid cycle; fluconazole-downregulated; downregulated by Efg1p; merged with orf19.6724 in Assembly 20
orf19.2657	1.36916	0.388994		Predicted ORF in Assemblies 19, 20 and 21
orf19.7517	1.36887	0.0798109	CHT1	Chitinase; putative N-terminal catalytic domain; has secretory signal sequence; lacks S/T region and N-glycosylation motifs of Chs2p and Chs3p; alkaline downregulated; expression not detected in yeast-form or hyphal cells
orf19.7453	1.36782	0.068121		Predicted ORF in Assemblies 19, 20 and 21; possibly spurious ORF (Annotation Working Group prediction)
orf19.2644	1.36745	0.205641	QCR2	Protein described as ubiquinol-cytochrome-c reductase; antigenic in human; transcriptionally induced by interaction with macrophage; repressed by nitric oxide; in detergent-resistant membrane fraction (possible lipid raft component)
orf19.3722	1.36692	0.0150928		Predicted ORF in Assemblies 19, 20 and 21
orf19.403	1.36642	0.00150195	PCL2	Cyclin homolog; reduced expression observed upon depletion of Cln3p; farnesol regulated; periodic mRNA expression, peak at cell-cycle G1/S phase
orf19.2923	1.36627	0.0876308		Predicted membrane transporter, member of the drug:proton antiporter (14 spanner) (DHA2) family, major facilitator superfamily (MFS); transcription is induced in response to alpha pheromone in SpiderM medium
orf19.1998	1.36491	0.0544589		Predicted ORF in Assemblies 19, 20 and 21
orf19.1155	1.3647	0.00931221	DPP2	Predicted ORF in Assemblies 19, 20 and 21; similar to S. cerevisiae pyrophosphate phosphatase Lpp1p; possible role in farnesol biosynthesis
orf19.6414.3	1.36462	0.182433	TPM2	Protein described as tropomyosin isoform 2; regulated by Gcn4p; repressed in response to amino acid starvation (3-aminotriazole treatment); macrophage-induced protein; protein level decreased in stationary phase cultures
orf19.5491.1	1.36317	0.107495	ATP14	ORF Predicted by Annotation Working Group; macrophage/pseudohyphal-induced
orf19.1891	1.36311	0.22356	2011-04-01	Vacuolar aspartic proteinase; mRNA abundance is equivalent in yeast-form and mycelial cells but is elevated at lower growth temperatures; upregulated in the presence of human neutrophils; detected by mass spec in stationary phase cultures
orf19.3455	1.36271	0.0722596		Predicted ORF in Assemblies 19, 20 and 21
orf19.6116	1.36235	0.303479	GLK4	Protein described as a glucokinase; decreased expression in hyphae compared to yeast-form cells
orf19.4899	1.36175	0.003323	GCA1	Predicted extracellular or plasma membrane-associated glucoamylase; promotes biofilm matrix formation; possible adhesin; gene is transcribed during rat oral infection; transcription is regulated by carbohydrates, pH, galactose
orf19.4768	1.3616	0.0137884		Predicted ORF in Assemblies 19, 20 and 21
orf19.5174	1.35887	0.162139	TAF19	Predicted ORF in Assemblies 19, 20 and 21; mutation confers hypersensitivity to amphotericin B
orf19.4229	1.35886	0.01758		Predicted ORF in Assemblies 19, 20 and 21
orf19.3544	1.358	0.0952949		Predicted ORF in Assemblies 19, 20 and 21
orf19.5157	1.35798	0.0274824		Predicted ORF in Assemblies 19, 20 and 21; hsix putative membrane-spanning regions; similar to S. cerevisiae Yjl097p, which is required for growth
orf19.4594	1.35772	0.179525		Predicted ORF in Assemblies 19, 20 and 21
orf19.2812	1.35746	0.0152812		Predicted ORF in Assemblies 19, 20 and 21
orf19.7123	1.35742	0.176396		Predicted ORF in Assemblies 19, 20 and 21; possibly spurious ORF (Annotation Working Group prediction)
orf19.5543	1.35662	0.025463		Predicted ORF in Assemblies 19, 20 and 21
orf19.2756	1.35593	0.00770059		Predicted ORF in Assemblies 19, 20 and 21
orf19.7016	1.355	0.0730736	PHM5	Protein not essential for viability; similar to S. cerevisiae Phm5p, which is a vacuolar endopolyphosphatase with a role in phosphate metabolism
orf19.1356	1.35493	0.0644702		Predicted ORF in Assemblies 19, 20 and 21
orf19.5426	1.3538	0.0385857		Putative patatin-like phospholipase; macrophage-regulated gene; fungal-specific (no human or murine homolog)
orf19.5770	1.35356	0.0500115	OPT8	Possible oligopeptide transporter; similar to Opt1p and to S. cerevisiae Ygl114wp, but not other OPTs; induced by nitric oxide, amphotericin B; expression of OPT6, -7, or -8 does not suppress defect of mutant lacking Opt1p, Opt2p, and Opt3p
orf19.3251	1.35335	0.0331901	ARC19	Predicted ORF in Assemblies 19, 20 and 21; mutation confers hypersensitivity to cytochalasin D
orf19.1599	1.35293	0.160999		Predicted ORF in Assemblies 19, 20 and 21
orf19.1160	1.35282	0.00266035		Predicted ORF in Assemblies 19, 20 and 21
orf19.5622	1.35214	0.0212222	GLC3	Protein described as similar to 1,4-glucan branching enzyme; fluconazole-induced; shows colony morphology-related gene regulation by Ssn6p; protein detected by mass spec in stationary phase cultures
orf19.1477	1.352	0.0207776		Predicted ORF in Assemblies 19, 20 and 21
orf19.1803	1.35176	0.0534903	CDC43	Beta subunit of heterodimeric protein geranylgeranyltransferase type I; GGTase I enzyme binds zinc, is Mg-dependent; Cdc42p is GGTase I substrate
orf19.1523	1.35173	0.00754686	FMO1	Predicted ORF in Assemblies 19, 20 and 21; mutation confers hypersensitivity to toxic ergosterol analog, and to amphotericin B
orf19.5363	1.35006	0.135393		Predicted ORF in Assemblies 19, 20 and 21
orf19.5984	1.34963	0.0116553		Predicted ORF in Assemblies 19, 20 and 21
orf19.4774	1.34875	0.00212081	AOX1	Alternative oxidase; low abundance; constitutively expressed; one of two isoforms (Aox1p and Aox2p); involved in a cyanide-resistant respiratory pathway present in plants, protists, and some fungi, although absent from S. cerevisiae
orf19.4255	1.34831	0.0189532	ECM331	GPI-anchored protein; mainly at plasma membrane, also at cell wall; caspofungin induced; Plc1p-regulated; repressed by Rim101p, Hog1p; colony morphology-related gene regulation by Ssn6p; induced in cyr1 homozygous null mutant yeast-form cel
orf19.6343	1.34811	0.0243103		Predicted ORF in Assemblies 19, 20 and 21
orf19.188	1.34794	0.170636		Predicted ORF in Assemblies 19, 20 and 21; merged with orf19.187 in Assembly 21
orf19.5095	1.34717	0.0104106		Predicted ORF in Assemblies 19, 20 and 21; caspofungin induced
orf19.2310.1	1.34698	0.0688936	RPL29	Ribosomal protein L29; transcription is induced upon germ tube formation; shows colony morphology-related gene regulation by Ssn6p; intron in 5'-UTR
orf19.2455	1.34688	0.0129659		Predicted ORF in Assemblies 19, 20 and 21
orf19.1029	1.34636	0.062715		Predicted ORF in Assemblies 19, 20 and 21
orf19.5094	1.34628	0.00301992	BUL1	Protein not essential for viability; macrophage/pseudohyphal-induced; similar to S. cerevisiae Bul1p, which may be involved in selection of substrates for ubiquitination
orf19.200	1.34623	0.142067		Predicted ORF in Assemblies 19, 20 and 21
orf19.2895	1.34615	0.108465	VMA8	Protein similar to the S. cerevisiae Vma8p subunit of vacuolar H+-ATPase; transcription is regulated by Nrg1p and Mig1p; transcription is increased in populations of cells exposed to fluconazole over multiple generations
orf19.3365	1.34566	0.0796732	DAO2	Putative D-amino acid oxidase
orf19.7468	1.34453	0.148837		Predicted ORF in Assemblies 19, 20 and 21
orf19.4853	1.34282	0.166343	HCM1	Protein with forkhead domain; similar to S. cerevisiae Hcm1p
orf19.6981	1.34274	0.200724		Predicted ORF in Assemblies 19, 20 and 21
orf19.6341	1.34231	0.0116725		Predicted ORF in Assemblies 19, 20 and 21
orf19.3218	1.34179	0.19905		Putative multidrug resistance protein; upregulated by Efg1p
orf19.4304	1.34052	0.21594	GAP1	General amino acid permease; antigenic in human, mouse; 10-12 transmembrane regions; regulated by nitrogen source; alkaline, GlcNAc, phagocytosis upregulated; not required for virulence in mouse systemic infection; fungal-specific
orf19.6928	1.33995	0.147143	SAP9	Secreted aspartyl proteinase; roles in adhesion, cell surface integrity; induced by antifungal drugs, stationary phase, or in white-phase cells; farnesol-downregulated in biofilm; autocatalytic processing; GPI-anchor; N-glycosylated
orf19.194	1.33963	0.0812163		Predicted ORF in Assemblies 19, 20 and 21; possibly spurious ORF (Annotation Working Group prediction)
orf19.3057	1.33902	0.072069		Predicted ORF in Assemblies 19, 20 and 21
orf19.4528	1.33701	0.212021		Predicted ORF in Assemblies 19, 20 and 21
orf19.1552	1.33651	0.247953	CPR3	Protein described as a peptidyl-prolyl cis-trans isomerase; macrophage-induced protein; protein level decreased in stationary phase cultures
orf19.3048	1.33649	0.00406232		Predicted ORF in Assemblies 19, 20 and 21; transcription is repressed in response to alpha pheromone in SpiderM medium
orf19.7237	1.33605	0.0039412		Predicted ORF in Assemblies 19, 20 and 21
orf19.6990	1.33588	0.00345521		Predicted ORF in Assemblies 19, 20 and 21
orf19.4670	1.33548	0.0385796	CAS5	Putative zinc finger transcription factor; cell wall damage response; required for wild-type transcriptional response to caspofungin; mutant caspofungin hypersensitive; downregulated in core stress response; avirulent, reduced CFU in mice
orf19.1179	1.33513	0.21753		Transcriptionally regulated by iron; expression greater in high iron; possibly subject to Kex2p processing
orf19.3972	1.33474	0.436909		Predicted ORF in Assemblies 19, 20 and 21
orf19.5231.2	1.33464	0.129913		ORF Predicted by Annotation Working Group
orf19.2884	1.33442	0.0308887	CDC68	Functional homolog of S. cerevisiae Cdc68p, which is a transcription elongation factor; essential; possible drug target
orf19.5392	1.3332	0.00848727	NGT1	N-acetylglucosamine (GlcNAc)-specific transporter; role in GlcNAc (but not serum) induced hyphal growth; localizes to plasma membrane; induced by GlcNAc, macrophage engulfment; 12 transmembrane, major facilitator superfamily
orf19.7091	1.33229	0.0132599		Predicted ORF in Assemblies 19, 20 and 21; induced by nitric oxide
orf19.2693	1.33165	0.104408	GST2	Increased transcription is observed upon benomyl treatment transcription and in populations of cells exposed to fluconazole over multiple generations; regulated by Nrg1p, Tup1p; induced by nitric oxide
orf19.1286	1.33131	0.0046333		Predicted ORF in Assemblies 19, 20 and 21
orf19.2785	1.33105	0.056489	ATP7	Putative subunit of the F1F0-ATPase complex; shows colony morphology-related gene regulation by Ssn6p; farnesol-, macrophage-downregulated protein abundance
orf19.1294	1.3296	0.245136		Predicted ORF from Assembly 19; merged with orf19.2629 in Assembly 20
orf19.5976	1.32956	0.0797849		Predicted ORF in Assemblies 19, 20 and 21; decreased transcription is observed upon fluphenazine treatment, in azole-resistant strains that overexpress CDR1 and CDR2 or MDR1
orf19.3077	1.32802	0.261987	VID21	Subunit of the NuA4 histone acetyltransferase complex; soluble protein in hyphae
orf19.559	1.32697	0.0234218	FGR14	Protein encoded in retrotransposon Zorro3 with similarity to retroviral endonuclease-reverse transcriptase proteins; lacks an ortholog in S. cerevisiae; transposon mutation affects filamentous growth
orf19.2465	1.32673	0.125367	POL32	Predicted ORF in Assemblies 19, 20 and 21; cell-cycle regulated periodic mRNA expression
orf19.1719	1.32661	0.0676204	SGA1	Putative glucoamylase; fungal-specific (no human or murine homolog)
orf19.4633	1.32636	0.0807048		Predicted ORF in Assemblies 19, 20 and 21
orf19.5644	1.32627	0.119392		Predicted ORF in Assemblies 19, 20 and 21
orf19.1074	1.32564	0.0987933		Predicted ORF from Assembly 19; removed from Assembly 20
orf19.6321	1.32457	0.00594159	PGA48	Putative GPI-anchored protein of unknown function; similar to S. cerevisiae Spi1p, which is induced at stationary phase; transcriptionally regulated by iron; expression greater in high iron
orf19.6573	1.32384	0.0209323	BEM2	Putative Rho1p GTPase activating protein (GAP); serum-induced transcription
orf19.976	1.3233	0.0646948	BRE1	Putative transcription factor with C3HC4 zinc finger DNA-binding motif; similar to S. cerevisiae Bre1p; transposon mutation affects filamentous growth
orf19.4553	1.3227	0.0127738		Predicted ORF in Assemblies 19, 20 and 21
orf19.1368	1.3221	0.0175723		Predicted ORF in Assemblies 19, 20 and 21
orf19.2149	1.32174	0.0475991		Predicted ORF in Assemblies 19, 20 and 21
orf19.9	1.32062	0.183054		Predicted ORF in Assemblies 19, 20 and 21; possibly spurious ORF (Annotation Working Group prediction)
orf19.4134	1.31965	0.14525		Predicted ORF in Assemblies 19, 20 and 21
orf19.105	1.31783	0.0112491	HAL22	Putative phosphoadenosine-5'-phosphate (PAP) or 3'-phosphoadenosine 5'-phosphosulfate (PAPS) phosphatase; possible role in sulfur recycling; induced upon biofilm formation
orf19.1266	1.3177	0.0538057		Predicted ORF in Assemblies 19, 20 and 21
orf19.2006	1.31762	0.0301874		Predicted ORF in Assemblies 19, 20 and 21
orf19.6281	1.31689	0.00183557		Predicted ORF from Assembly 19; merged with orf19.177 in Assembly 20
orf19.5166	1.31629	0.0658362	DBF4	Predicted ORF in Assemblies 19, 20 and 21; macrophage/pseudohyphal-repressed; cell-cycle regulated periodic mRNA expression; S. cerevisiae ortholog is not cell-cycle regulated
orf19.6458.1	1.31579	0.155563		ORF Predicted by Annotation Working Group
orf19.4415	1.31568	0.102293		Predicted ORF in Assemblies 19, 20 and 21; possibly spurious ORF (Annotation Working Group prediction)
orf19.7255	1.31557	0.166228	RPC10	Predicted ORF in Assemblies 19, 20 and 21; flucytosine induced
orf19.7202	1.31513	0.0320638		Predicted ORF in Assemblies 19, 20 and 21
orf19.5627	1.31419	0.0277982		Predicted ORF in Assemblies 19, 20 and 21
orf19.2032	1.31379	0.0218256		Predicted ORF in Assemblies 19, 20 and 21
orf19.3567	1.31369	0.00928627	BIO32	Predicted ORF in Assemblies 19, 20 and 21; induced during planktonic growth
orf19.3526	1.31345	0.00756391	ITR1	Inositol transporter required for uptake of exogenous inositol; major facilitator superfamily; 12 probable transmembrane motifs; expressed in rich medium with 2% glucose; fluconazole, caspofungin downregulated
orf19.3763	1.31327	0.00961988		Predicted ORF in Assemblies 19, 20 and 21
orf19.5192	1.31296	0.130173		Predicted ORF from Assembly 19; removed from Assembly 20
orf19.7592	1.31172	0.0404865	FAA4	Predicted acyl CoA synthase
orf19.6308	1.30993	0.0876685		Predicted ORF in Assemblies 19, 20 and 21
orf19.131.2	1.30907	0.132501		ORF Predicted by Annotation Working Group
orf19.3150	1.30893	0.162003	GRE2	Protein described as a reductase; transcription is regulated by Nrg1p and Tup1p; benomyl-induced; hyphal-induced; macrophage/pseudohyphal-repressed; expression greater in low iron; reported to be involved in osmotic stress response
orf19.804	1.30878	0.224526		Predicted ORF in Assemblies 19, 20 and 21
orf19.4775	1.30866	0.350459	CTA8	Protein that activates transcription in 1-hybrid assay in S. cerevisiae; transcriptionally activated by Mnl1p under weak acid stress
orf19.6254	1.30803	0.021343	ANT1	Predicted ORF in Assemblies 19, 20 and 21
orf19.6909	1.30799	0.273299		Predicted ORF in Assemblies 19, 20 and 21
orf19.5303	1.30783	0.0206578	PGA30	Putative GPI-anchored protein of cell wall
orf19.5575	1.30762	0.143278		Predicted ORF in Assemblies 19, 20 and 21
orf19.6696	1.30742	0.162842	TIM9	Predicted ORF in Assemblies 19, 20 and 21; transcription is upregulated in both intermediate and mature biofilms
orf19.726	1.30699	0.171323	PPZ1	Putative protein phosphatase of the Type 1 family (serine/threonine-specific), similar to S. cerevisiae Ppz1p; predicted ORF in Assemblies 19, 20 and 21
orf19.2089	1.30689	0.0846104		Predicted ORF in Assemblies 19, 20 and 21
orf19.4615	1.30576	0.148105		Predicted ORF in Assemblies 19, 20 and 21
orf19.857	1.3057	0.122776	FMO2	Predicted ORF in Assemblies 19, 20 and 21; expression regulated during planktonic growth
orf19.4962	1.30558	0.00786071		Predicted ORF in Assemblies 19, 20 and 21
orf19.4545	1.30503	0.0811728	SWI4	Predicted ORF in Assemblies 19, 20 and 21; periodic mRNA expression, peak at cell-cycle G1/S phase; predicted, conserved MBF binding sites upstream of G1/S-regulated genes
orf19.7282	1.30488	0.132776	PEX13	Protein required for peroxisomal protein import mediated by PTS1 and PTS2 targeting sequences; transcription is upregulated in an RHE model of oral candidiasis
orf19.422	1.3043	0.273255	SPT20	Protein described as a transcription factor; downregulated upon adherence to polystyrene; flucytosine repressed
orf19.1720	1.30427	0.00708677		Predicted ORF in Assemblies 19, 20 and 21
orf19.3761	1.30418	0.180474	CDC54	Transcription is regulated by Nrg1p and Mig1p; periodic mRNA expression, peak at cell-cycle M/G1 phase
orf19.846	1.30335	0.0205794		Predicted ORF in Assemblies 19, 20 and 21; transcriptionally activated by Mnl1p under weak acid stress
orf19.2111.2	1.3024	0.34077	RPL38	Predicted ribosomal protein; genes encoding cytoplasmic ribosomal subunits, translation factors, and tRNA synthetases are downregulated upon phagocytosis by murine macrophage
orf19.2752	1.30168	0.103215	ADR1	Putative transcription factor with zinc finger DNA-binding motif; similar to S. cerevisiae Adr1p but mutant phenotype suggests that it has a different set of target genes; transposon mutation affects filamentous growth
orf19.1727	1.3014	0.143658	PMC1	Vacuolar calcium P-type ATPase; transcription is regulated by calcineurin and fluconazole; mutant shows increased resistance to fluconazole or lithium, and increased sensitivity to calcium
orf19.5845	1.30079	0.105029	RNR3	Protein described as large subunit of ribonucleotide reductase; transcriptionally regulated by iron; expression greater in low iron
orf19.7403	1.30064	0.0509552		Predicted ORF in Assemblies 19, 20 and 21
orf19.2890	1.30033	0.00864082		Predicted ORF in Assemblies 19, 20 and 21
orf19.5760	1.30027	0.276821	IHD1	Putative GPI-anchored protein of unknown function; alkaline upregulated; greater transcription in hyphal form than yeast form; regulated by Nrg1p, Rfg1p, Tup1p; regulated by Tsa1p, Tsa1Bp in minimal media at 37; not essential for viability
orf19.7522	1.30005	0.316128		Predicted ORF in Assemblies 19, 20 and 21; mutation confers hypersensitivity to amphotericin B
orf19.1077	1.29988	0.0088441	ATM1	Member of MDR subfamily of ABC family; similar to S. cerevisiae ABC transporter, Atm1p; transcriptionally regulated by iron; expression greater in low iron; induced by nitric oxide in yhb1 mutant
orf19.24	1.29924	0.379764	RTA2	Putative floppase; required for sphingolipid long chain base release; mediates calcineurin-dependent resistance to azoles; stress-associated protein; Ca2+, calcineurin-regulated; ketoconazole, caspofungin induced; Plc1p-regulated
orf19.6531.1	1.29838	0.138068	TOM71	ORF Predicted by Annotation Working Group; flucytosine induced
orf19.6552	1.29802	0.230225		Predicted ORF in Assemblies 19, 20 and 21
orf19.7205	1.29785	0.203021	DUR7	Putative urea transporter; fungal-specific (no human or murine homolog)
orf19.2250	1.29766	0.197561	SPE3	Predicted ORF in Assemblies 19, 20 and 21
orf19.4351	1.29756	0.0247829	PRP12	Predicted ORF from Assembly 19; fungal-specific (no human or murine homolog); merged with orf19.4379 in Assembly 20
orf19.4653	1.29727	0.25289		Transcriptionally regulated by iron; expression greater in low iron; similar to GPI-linked cell-wall proteins
orf19.4270	1.29727	0.101636		Predicted ORF in Assemblies 19, 20 and 21
orf19.7490	1.29639	0.133266		Predicted membrane transporter, member of the fucose:proton symporter (FHS) family, major facilitator superfamily (MFS)
orf19.3225	1.29612	0.0907447	CWH43	Predicted ORF in Assemblies 19, 20 and 21; transcription is downregulated in both intermediate and mature biofilms
orf19.4348	1.2954	0.00175501		Predicted ORF in Assemblies 19, 20 and 21
orf19.1738	1.29534	0.0117636	UGP1	Protein similar to UTP-glucose-1-phosphaturidyl transferase; localizes to cell surface of yeast-form cells, but not hyphal cells; Hog1p-downregulated; protein detected by mass spec in stationary phase cultures
orf19.7357	1.29503	0.053902		Predicted ORF in Assemblies 19, 20 and 21
orf19.2870	1.29476	0.0230728		Predicted ORF in Assemblies 19, 20 and 21
orf19.1767	1.29402	0.185393		Predicted ORF in Assemblies 19, 20 and 21
orf19.8	1.29396	0.0275567		Predicted ORF in Assemblies 19, 20 and 21; possibly spurious ORF (Annotation Working Group prediction)
orf19.2753	1.29375	0.0681754		Predicted zinc-finger protein of unknown function
orf19.2691	1.29291	0.126924		Predicted ORF in Assemblies 19, 20 and 21; possibly spurious ORF (Annotation Working Group prediction)
orf19.6205	1.29243	0.19171		Predicted ORF in Assemblies 19, 20 and 21
orf19.4812	1.29214	0.0150535		Predicted ORF in Assemblies 19, 20 and 21
orf19.792	1.29145	0.0889031		Predicted ORF in Assemblies 19, 20 and 21
orf19.6861	1.29106	0.000746404		Predicted ORF in Assemblies 19, 20 and 21
orf19.6456	1.28995	0.0246131		Predicted ORF in Assemblies 19, 20 and 21
orf19.3014	1.28961	0.104392	BMH1	14-3-3 protein, role in hyphal growth; possibly regulated by host interaction; sole 14-3-3 protein in C. albicans while S. cerevisiae has two 14-3-3 proteins; localizes to cell surface of yeast-form cells but not of hyphae; intron in 5'-UTR
orf19.3198	1.28938	0.143312	OBPA	Similar to oxysterol binding protein; gene is located within the MTLa mating-type-like locus; Plc1p-regulated
orf19.7668	1.28869	0.019087	MAL2	Alpha-glucosidase that hydrolyzes sucrose; required for sucrose utilization; transcriptionally regulated by Suc1p; expression induced by maltose, repressed by glucose; transposon mutation affects filamentous growth; upregulated in RHE model
orf19.7313	1.28868	0.0775021	SSU1	Protein similar to S. cerevisiae Ssu1p sulfite transport protein; transposon mutation affects filamentous growth; regulated by Gcn2p and Gcn4p; induced by nitric oxide
orf19.5548	1.28856	0.0132535		Putative transcription factor with zinc cluster DNA-binding motif; has similarity to S. cerevisiae Lys14p, which is a transcription factor involved in the regulation of lysine biosynthesis genes
orf19.3468	1.28814	0.00887641	ALG11	Protein with similarity to mannosyltransferases
orf19.3762	1.28759	0.272813		Predicted ORF in Assemblies 19, 20 and 21
orf19.568	1.2874	0.062193	SPE2	Predicted ORF in Assemblies 19, 20 and 21; possibly adherence-induced
orf19.6526	1.28713	0.0991524		Predicted ORF in Assemblies 19, 20 and 21
orf19.4862	1.28695	0.00938095		Predicted ORF in Assemblies 19, 20 and 21
orf19.6788	1.28662	0.17084		Predicted ORF in Assemblies 19, 20 and 21
orf19.6247	1.28607	0.173899		Predicted ORF in Assemblies 19, 20 and 21
orf19.1866	1.28587	0.122692		Predicted ORF in Assemblies 19, 20 and 21
orf19.5196	1.28562	0.0176898	ESS1	Prolyl isomerase (parvulin class); essential; involved in yeast-hyphal switching, Cph1p pathway; has inflexible linker between WW and isomerase domains, unlike human homolog; functional homolog of S. cerevisiae Ess1p
orf19.1359	1.28541	0.00756646		Predicted ORF in Assemblies 19, 20 and 21
orf19.164	1.28526	0.0707893		Predicted ORF in Assemblies 19, 20 and 21
orf19.1196	1.28518	0.0891461		Predicted ORF in Assemblies 19, 20 and 21
orf19.7610	1.28482	0.0186559	PTP3	Protein not essential for viability; similar to S. cerevisiae Ptp3p, which is a protein tyrosine phosphatase; hyphal induced; alkaline upregulated; regulated by Efg1p, Ras1p, cAMP pathways
orf19.6941	1.28383	0.0321868		Predicted ORF in Assemblies 19, 20 and 21
orf19.5285	1.2833	0.0542741	PST3	Putative flavodoxin; biofilm induced; fungal-specific (no human or murine homolog); protein detected by mass spec in stationary phase cultures
orf19.2247	1.28204	0.172694		Predicted ORF in Assemblies 19, 20 and 21
orf19.3293	1.28173	0.105676		Predicted ORF in Assemblies 19, 20 and 21
orf19.5001	1.28171	0.293237	CUP2	Protein not essential for viability; similar to S. cerevisiae Cup2p, which is a copper-binding transcription factor that activates transcription of metallothionein genes
orf19.2274	1.28163	0.0950505		Predicted ORF in Assemblies 19, 20 and 21; possibly spurious ORF (Annotation Working Group prediction)
orf19.7193	1.28162	0.132477		Predicted ORF in Assemblies 19, 20 and 21
orf19.2703	1.28159	0.0735816		Transcriptionally regulated by iron; expression greater in low iron; increased expression observed in an ssr1 homozygous null mutant; similar to S. cerevisiae Ymr171cp; fungal-specific (no human or murine homolog)
orf19.6795	1.28117	0.143841		Predicted ORF in Assemblies 19, 20 and 21; possibly spurious ORF (Annotation Working Group prediction)
orf19.5431	1.28042	0.0474126		Predicted ORF in Assemblies 19, 20 and 21
orf19.4142	1.28039	0.025768		Predicted ORF in Assemblies 19, 20 and 21; decreased transcription is observed upon fluphenazine treatment
orf19.6382	1.28022	0.0302157		Putative MRP/CFTR-subfamily ABC transporter; member of multidrug resistance-associated protein (MRP) subfamily of ABC family; similar to S. cerevisiae Bpt1p
orf19.2649	1.28012	0.258185	PCL1	Cyclin homolog; expression induced upon filamentous growth; transcription is induced in response to alpha pheromone in SpiderM medium
orf19.1169	1.27993	0.00664387		Predicted ORF in Assemblies 19, 20 and 21
orf19.330.1	1.2791	0.0291165		ORF Predicted by Annotation Working Group
orf19.720	1.27908	0.206383	GST3	Expression is regulated upon white-opaque switching; upregulated in the presence of human neutrophils; peroxide-induced; induced in response to alpha pheromone in SpiderM medium
orf19.3234.1	1.27818	0.171283	SFT1	ORF Predicted by Annotation Working Group; Plc1p-regulated
orf19.1848.1	1.27787	0.100306		ORF Predicted by Annotation Working Group
orf19.3898	1.27764	0.00766677		Predicted ORF in Assemblies 19, 20 and 21
orf19.6264.4	1.27753	0.23923		ORF Predicted by Annotation Working Group
orf19.3146	1.27737	0.138512		Predicted ORF from Assembly 19; merged with orf19.2227 in Assembly 20
orf19.6276	1.27736	0.00729606		Predicted ORF in Assemblies 19, 20 and 21
orf19.7124	1.27716	0.0740508	RVS161	Protein required for endocytosis; contains a BAR domain, which is found in proteins involved in membrane curvature; null mutant exhibits defects in hyphal growth, virulence, cell wall integrity, and actin patch localization
orf19.2770.1	1.277	0.103175	SOD1	Cytosolic copper- and zinc-containing superoxide dismutase, involved in protection from oxidative stress and required for full virulence; alkaline upregulated by Rim101p; upregulated in the presence of human blood
orf19.5241	1.27623	0.129941	SNT1	Protein similar to S. cerevisiae Snt1p, which is an NAD-independent histone deacetylase; not essential for viability; transposon mutation affects filamentous growth
orf19.4146	1.27619	0.0853214	SMD3	Protein described as a core snRNP protein; induced upon adherence to polystyrene
orf19.5960	1.27547	0.385106		Predicted ORF in Assemblies 19, 20 and 21
orf19.4109	1.27494	0.0480875	PMT4	Protein mannosyltransferase required for normal cell wall composition and full virulence in mouse systemic infection; has roles in hyphal growth and drug sensitivity; one of 5 PMT family members; Axl2p is a substrate
orf19.849	1.27489	0.144521		Predicted ORF in Assemblies 19, 20 and 21
orf19.1462	1.27462	0.0872631	SMP2	Transcription is regulated by Nrg1p
orf19.2927	1.27439	0.0562688	MNN11	Protein with similarity to mannosyltransferases
orf19.4524	1.27363	0.00291229		Predicted zinc-finger protein of unknown function; caspofungin induced
orf19.6184	1.27323	0.327055		Predicted ORF in Assemblies 19, 20 and 21; possibly spurious ORF (Annotation Working Group prediction)
orf19.2582	1.27318	0.136166		Predicted ORF in Assemblies 19, 20 and 21
orf19.7488	1.27314	0.00972945		Predicted ORF in Assemblies 19, 20 and 21
orf19.1360.1	1.27283	0.335207		ORF Predicted by Annotation Working Group
orf19.7553	1.27278	0.0224367		Predicted ORF in Assemblies 19, 20 and 21
orf19.6347	1.27249	0.03356		Predicted ORF in Assemblies 19, 20 and 21
orf19.5067	1.272	0.10744		Predicted ORF in Assemblies 19, 20 and 21
orf19.2842	1.27142	0.0203553	GZF3	Predicted ORF in Assemblies 19, 20 and 21; oxidative stress-induced via Cap1p
orf19.6287	1.27089	0.332021	AAT21	Predicted ORF in Assemblies 19, 20 and 21; Gcn4p-regulated; protein detected by mass spec in exponential and stationary phase cultures
orf19.5673	1.26966	0.0151243	OPT7	Putative oligopeptide transporter; possibly transports GSH and related compounds; induced upon biofilm formation; Hog1p-induced; expression of OPT6, -7, or -8 does not suppress defect of mutant lacking Opt1p, -2p, or -3p; fungal-specific
orf19.1445	1.26863	0.177444	ESC4	Protein similar to S. cerevisiae Esc4p, which represses transposition; transposon mutation affects filamentous growth
orf19.3937	1.26863	0.0943816		Predicted ORF in Assemblies 19, 20 and 21
orf19.5486.1	1.2685	0.0643768	SMD2	ORF Predicted by Annotation Working Group; flucytosine induced
orf19.7170	1.26811	0.0483974		Predicted ORF in Assemblies 19, 20 and 21; possibly spurious ORF (Annotation Working Group prediction)
orf19.7502	1.26733	0.287894		Predicted ORF in Assemblies 19, 20 and 21; greater mRNA abundance observed in a cyr1 homozygous null mutant than in wild type; possibly spurious ORF (Annotation Working Group prediction)
orf19.6013	1.26726	0.0433441		Predicted ORF in Assemblies 19, 20 and 21
orf19.62	1.26706	0.0434896		Predicted ORF from Assembly 19; merged with orf19.73 in Assembly 20
orf19.4701	1.26676	0.00143209		Predicted ORF in Assemblies 19, 20 and 21
orf19.1223	1.26654	0.236478	DBF2	Essential serine/threonine protein kinase involved in mitotic spindle formation and cytokinesis; required for septum formation, exit from mitosis, and normal hyphal morphogenesis; virulence-group-correlated expression
orf19.5040	1.2662	0.129828		Predicted ORF in Assemblies 19, 20 and 21
orf19.5522	1.26536	0.000517901		Predicted ORF in Assemblies 19, 20 and 21; possibly spurious ORF (Annotation Working Group prediction)
orf19.7531	1.26431	0.00579024		Predicted ORF in Assemblies 19, 20 and 21; transcription is induced upon yeast-hyphal transition; benomyl or caspofungin induced; protein detected by mass spec in stationary phase cultures
orf19.5209	1.26307	0.041077		Predicted ORF in Assemblies 19, 20 and 21
orf19.1531	1.26303	0.0965648		Predicted ORF in Assemblies 19, 20 and 21
orf19.6947	1.26238	0.16286	GTT11	Predicted ORF in Assemblies 19, 20 and 21; induced by nitric oxide
orf19.4243	1.26225	0.247554		Predicted ORF in Assemblies 19, 20 and 21; not essential for viability; similar to S. cerevisiae Cue2p, which is a protein containing two CUE domains that bind ubiquitin
orf19.6732	1.26088	0.110749		Predicted ORF in Assemblies 19, 20 and 21
orf19.1115	1.26085	0.0353057	GUK1	Putative guanylate kinase; identified in extracts from biofilm and planktonic cells; protein level decreased in stationary phase cultures
orf19.1992	1.2607	0.00298045	SIR2	Required for wild-type lifespan, asymmetric inheritance of oxidatively damaged proteins, rDNA silencing; regulates phenotypic switching in strain 3153A, not WO-1; partially functionally complements S. cerevisiae sir2 mutant mating defect
orf19.3100	1.26034	0.0171901		Predicted ORF in Assemblies 19, 20 and 21; transcription is repressed in response to alpha pheromone in SpiderM medium
orf19.6551.1	1.26024	0.20409	STE18	ORF Predicted by Annotation Working Group; similar to S. cerevisiae Ste18p; expressed in opaque or white MTLa/MTLa or MTLalpha/MTLalpha, but not MTLa/MTLalpha cells; MTLa1p, MTLalpha2p bind promoter region
orf19.5322	1.26017	0.0820358		Predicted ORF in Assemblies 19, 20 and 21
orf19.6413	1.25978	0.107241		Predicted ORF in Assemblies 19, 20 and 21; possibly spurious ORF (Annotation Working Group prediction)
orf19.641	1.25968	0.197252		Predicted ORF in Assemblies 19, 20 and 21
orf19.2698	1.25932	0.142677		Predicted ORF in Assemblies 19, 20 and 21
orf19.2263	1.25916	0.00203365		Predicted ORF in Assemblies 19, 20 and 21
orf19.6851	1.25916	0.0252327	CHL4	Protein described as having role in chromosome segregation; RNA abundance regulated by tyrosol and cell density
orf19.2801	1.25912	0.151827		Predicted ORF from Assembly 19; removed from Assembly 20
orf19.669	1.25869	0.014779	PRM1	Protein induced during the mating process
orf19.4637	1.25832	0.0261367		Predicted ORF in Assemblies 19, 20 and 21
orf19.209	1.25829	0.175734	DFG10	Predicted ORF in Assemblies 19, 20 and 21
orf19.578	1.25715	0.0735105		Predicted ORF in Assemblies 19, 20 and 21
orf19.2827	1.25708	0.00446332		Predicted ORF in Assemblies 19, 20 and 21
orf19.3456	1.25617	0.0240383		Predicted ORF in Assemblies 19, 20 and 21
orf19.3414	1.25613	0.230916	SUR7	Protein required for wild-type cell wall, plasma membrane, cytoskeletal organization, endocytosis; localizes to eisosome subdomains of plasma membrane; four transmembrane motifs; mutant shows ectopic, chitin-rich cell wall
orf19.6066	1.25598	0.197204		Predicted ORF in Assemblies 19, 20 and 21
orf19.5651	1.2559	0.21689		Predicted ORF in Assemblies 19, 20 and 21
orf19.1842	1.25589	0.155429		Predicted ORF in Assemblies 19, 20 and 21
orf19.5842	1.25568	0.0869188		Predicted ORF in Assemblies 19, 20 and 21
orf19.6298	1.25567	0.128252	SPB4	Predicted ORF in Assemblies 19, 20 and 21; flucytosine repressed
orf19.6783	1.25562	0.0141915		Predicted ORF in Assemblies 19, 20 and 21
orf19.5857	1.25558	0.184847		Predicted ORF in Assemblies 19, 20 and 21
orf19.2665	1.2555	0.3559	MSN5	Predicted ORF in Assemblies 19, 20 and 21
orf19.1429	1.25509	0.133824	SOH1	Predicted ORF in Assemblies 19, 20 and 21; cell-cycle regulated periodic mRNA expression
orf19.7028	1.25473	0.137019		Predicted ORF in Assemblies 19, 20 and 21; merged with orf19.7027 in Assembly 21
orf19.7355	1.2547	0.0652488	SSN8	Protein not essential for viability; similar to S. cerevisiae Ssn8p, which is a component of RNA polymerase II holoenzyme
orf19.4199	1.25454	0.0963206		Predicted ORF in Assemblies 19, 20 and 21
orf19.3715	1.25435	0.0287298	ASF1	Protein likely to be essential for growth, based on an insertional mutagenesis strategy; similar to S. cerevisiae Asf1p, which is a chromatin assembly complex component
orf19.5012	1.25399	0.227361		Predicted ORF in Assemblies 19, 20 and 21; possibly spurious ORF (Annotation Working Group prediction)
orf19.1301	1.25393	0.307614		Predicted ORF in Assemblies 19, 20 and 21
orf19.5225	1.25366	0.31164		Predicted ORF in Assemblies 19, 20 and 21; possibly spurious ORF (Annotation Working Group prediction)
orf19.6709	1.25326	0.0627042		Predicted ORF in Assemblies 19, 20 and 21
orf19.1606	1.25318	0.0950845		Predicted ORF in Assemblies 19, 20 and 21; Plc1p-regulated
orf19.7271	1.25297	0.02706		Predicted ORF in Assemblies 19, 20 and 21; possibly spurious ORF (Annotation Working Group prediction)
orf19.3674	1.25283	0.0126319	GAL102	Predicted ORF in Assemblies 19, 20 and 21; mutation confers hypersensitivity to toxic ergosterol analog
orf19.7409	1.25266	0.0311581	ERV25	Transcription is induced upon filamentous growth
orf19.3604	1.25244	0.287573		Predicted ORF in Assemblies 19, 20 and 21
orf19.1480	1.25235	0.0455335		Protein described as succinate dehydrogenase, enzyme of citric acid cycle; downregulated by Efg1p; repressed by nitric oxide
orf19.262	1.25191	0.232316	SMC3	Protein likely to be essential for growth, based on an insertional mutagenesis strategy; similar to S. cerevisiae Smc3p, which is an ATPase involved in sister chromatid cohesion
orf19.3795	1.25191	0.276064	AGP3	Putative serine transporter with possible role in assimilation of sulfur; induced upon early biofilm formation; fungal-specific (no human or murine homolog)
orf19.3453	1.25177	0.0893235		Predicted ORF in Assemblies 19, 20 and 21
orf19.811	1.25169	0.491668		Protein not essential for viability
orf19.5667	1.25055	0.0723025	MNR2	Putative ion transporter; fungal-specific (no human or murine homolog)
orf19.1994	1.25046	0.118753		Predicted ORF in Assemblies 19, 20 and 21
orf19.95	1.25034	0.307843		Predicted ORF in Assemblies 19, 20 and 21
orf19.1936	1.2503	0.165267	SNF1	Essential protein; functional homolog of S. cerevisiae Snf1p regulator of sugar metabolism; constitutively expressed; Thr208 phosphorylation may have regulatory role; up-regulation associated with azole resistance; has polyhistidine tract
orf19.2699	1.25026	0.046928	ABP1	Protein similar to S. cerevisiae Abp1p, which is an actin-binding protein of the cortical actin cytoskeleton; caspofungin induced; protein detected by mass spec in stationary phase cultures
orf19.1888	1.25024	0.0651371		Predicted ORF in Assemblies 19, 20 and 21
orf19.6786	1.25022	0.0868524		Predicted ORF in Assemblies 19, 20 and 21; possibly spurious ORF (Annotation Working Group prediction)
orf19.4323	1.25004	0.214106		Predicted ORF in Assemblies 19, 20 and 21
orf19.1755	1.25001	0.26694		Predicted ORF in Assemblies 19, 20 and 21
orf19.5124	1.24928	0.1105	RBR3	Cell wall protein; expression is repressed by Rim101p
orf19.4914	1.24888	0.0852801		Predicted ORF in Assemblies 19, 20 and 21
orf19.2805	1.24865	0.0527096		Predicted ORF in Assemblies 19, 20 and 21; expression regulated during planktonic growth
orf19.6005	1.24839	0.107916	HGT5	Putative glucose transporter of the major facilitator superfamily; the C. albicans glucose transporter family comprises 20 members; 12 probable membrane-spanning segments, extended N terminus; expressed in rich medium with 2% glucose
orf19.3340	1.24783	0.175994	SOD2	Mitochondrial Mn-containing superoxide dismutase; protection against oxidative stress; active as homotetramer; N-terminal 34 amino acids removed upon mitochondrial import; H2O2-induced via Cap1p; alkaline downregulated, farnesol-induced
orf19.4105	1.24716	0.135078		Predicted ORF in Assemblies 19, 20 and 21
orf19.1125	1.24665	0.0762517		Predicted ORF from Assembly 19; merged with orf19.2165 in Assembly 20
orf19.3245	1.2466	0.0135271		Predicted ORF in Assemblies 19, 20 and 21
orf19.1484	1.24617	0.0238286		Predicted ORF in Assemblies 19, 20 and 21
orf19.6544	1.24604	0.171843	LPI9	Predicted ORF in Assemblies 19, 20 and 21
orf19.2036	1.24589	0.0843567		Predicted ORF in Assemblies 19, 20 and 21
orf19.6327	1.24573	0.0137098	HET1	Putative sphingomyelin transfer protein
orf19.1659	1.24535	0.247455	ALG8	Putative glucosyltransferase involved in cell wall mannan biosynthesis; transcription is elevated in nik1 and sln1 homozygous null mutants, but not in the chk1 null mutant
orf19.2431	1.24515	0.08717		Predicted ORF in Assemblies 19, 20 and 21; transcription is induced in response to alpha pheromone in SpiderM medium
orf19.5014	1.24489	0.122307		Predicted ORF in Assemblies 19, 20 and 21
orf19.529	1.24461	0.0141528		Predicted ORF in Assemblies 19, 20 and 21
orf19.1198	1.24448	0.198914		Predicted ORF in Assemblies 19, 20 and 21
orf19.1267	1.24445	0.0995516		Predicted ORF in Assemblies 19, 20 and 21
orf19.190	1.24403	0.386235		Predicted ORF in Assemblies 19, 20 and 21
orf19.3554	1.24375	0.388582	AAT1	Protein described as aspartate aminotransferase; soluble protein in hyphae; macrophage-induced protein; alkaline upregulated; amphotericin B repressed; gene used for strain identification by multilocus sequence typing, farnesol-induced
orf19.640	1.24285	0.280543		Predicted ORF in Assemblies 19, 20 and 21
orf19.6586	1.24281	0.275384		Predicted ORF in Assemblies 19, 20 and 21; increased transcription is observed upon benomyl treatment or in an azole-resistant strain that overexpresses MDR1; shows colony morphology-related gene regulation by Ssn6p; induced by nitric oxide, 17-beta-estradiol, ethynyl estradiol; macrophage-downregulated gene
orf19.6983	1.24258	0.305679		Predicted ORF in Assemblies 19, 20 and 21; repressed by nitric oxide
orf19.3283	1.24254	0.00847015		Predicted ORF in Assemblies 19, 20 and 21
orf19.418	1.24166	0.316726	KOG1	Protein likely to be essential for growth, based on an insertional mutagenesis strategy; heterozygous null mutant displays sensitivity to rapamycin
orf19.1210	1.24163	0.012832		Predicted ORF in Assemblies 19, 20 and 21
orf19.7112	1.24099	0.0886083	FRP2	Protein described as ferric reductase; alkaline upregulated by Rim101p; fluconazole-downregulated; upregulated in the presence of human neutrophils; possibly adherence-induced
orf19.6293	1.24082	0.237942		Predicted ORF in Assemblies 19, 20 and 21
orf19.479.2	1.24074	0.0664907		ORF Predicted by Annotation Working Group
orf19.350	1.24058	0.256599	PRE9	Alpha3 (C9) subunit of the 20S proteasome; transcription is regulated by Mig1p
orf19.1721	1.2402	0.0379072	NCE103	Carbonic anhydrase involved in the conversion of carbon dioxide to bicarbonate; essential for pathogenesis in host niches with limited CO2, wild-type white-opaque switching; biofilm induced; activated by Mnl1p under weak acid stress
orf19.1045	1.24003	0.0362236		Predicted ORF in Assemblies 19, 20 and 21; mutation confers hypersensitivity to 5-fluorocytosine (5-FC), 5-fluorouracil (5-FU), and tubercidin (7-deazaadenosine)
orf19.6261	1.23983	0.0968863	BPH1	Protein not essential for viability; similar to S. cerevisiae Bph1p, which is a putative ortholog of human Chediak-Higashi syndrome protein and murine beige gene implicated in disease syndromes involving defective lysosomal trafficking
orf19.4046	1.23965	0.03563		Putative transcription factor containing a Zn(2)-Cys(6) binuclear cluster; predicted ORF in Assemblies 19, 20 and 21
orf19.230	1.23862	0.0705176		Predicted ORF in Assemblies 19, 20 and 21
orf19.4125	1.23826	0.11661		Putative transcription factor with zinc finger DNA-binding motif
orf19.6132	1.23825	0.263674		Predicted ORF in Assemblies 19, 20 and 21; possibly spurious ORF (Annotation Working Group prediction)
orf19.7661	1.23787	0.0136878	HMI1	ATP-dependent 3' - 5' helicase involved in maintenance of mitochondrial DNA; ortholog of S. cerevisiae Hmi1p
orf19.3122.2	1.23777	0.0700965		ORF Predicted by Annotation Working Group
orf19.547	1.23737	0.0888937		Predicted ORF in Assemblies 19, 20 and 21
orf19.4024	1.23734	0.0850048	RIB5	Putative riboflavin synthase; fungal-specific (no human or murine homolog); farnesol-downregulated; protein detected by mass spec in exponential and stationary phase cultures
orf19.5065	1.23631	0.048024		Predicted ORF in Assemblies 19, 20 and 21
orf19.6810	1.23594	0.0934876		Predicted ORF in Assemblies 19, 20 and 21
orf19.7130	1.23527	0.0407611		Predicted ORF in Assemblies 19, 20 and 21
orf19.2204	1.23514	0.0819746		Predicted ORF in Assemblies 19, 20 and 21
orf19.3983	1.23483	0.0364675		Predicted ORF in Assemblies 19, 20 and 21
orf19.2707.1	1.23461	0.109761	QCR9	ORF Predicted by Annotation Working Group; shows colony morphology-related gene regulation by Ssn6p
orf19.2101	1.23427	0.0348504		Predicted ORF in Assemblies 19, 20 and 21
orf19.5380	1.23412	0.0656907	LYS144	Putative transcription factor with zinc cluster DNA-binding motif; has similarity to S. cerevisiae Lys14p, which is a transcription factor involved in the regulation of lysine biosynthesis genes
orf19.7441	1.23394	0.0211398		Predicted ORF in Assemblies 19, 20 and 21
orf19.4161	1.23375	0.212992		Predicted ORF in Assemblies 19, 20 and 21
orf19.1632	1.23358	0.0876019		Predicted ORF in Assemblies 19, 20 and 21
orf19.342	1.23341	0.0941969	BMT7	Putative beta-mannosyltransferase, member of a 9-gene family that includes characterized genes BMT1, BMT2, BMT3, and BMT4 with roles in beta-1,2-mannosylation of cell wall phosphopeptidomannan; downregulated in an azole-resistant strain
orf19.7378	1.23297	0.223238		Predicted ORF in Assemblies 19, 20 and 21
orf19.2784	1.2329	0.0147905		Predicted ORF in Assemblies 19, 20 and 21
orf19.7293	1.23232	0.131843	MPS1	Predicted ORF in Assemblies 19, 20 and 21; essential for growth; periodic mRNA expression, peak at cell-cycle S/G2 phase
orf19.7212	1.23213	0.142611		Phosphorylated protein of unknown function; predicted ORF in Assemblies 19, 20 and 21
orf19.2401	1.23151	0.0939581		Predicted ORF in Assemblies 19, 20 and 21
orf19.2087	1.23149	0.195408		Predicted ORF in Assemblies 19, 20 and 21
orf19.1333	1.2306	0.0276414	SNG3	Predicted ORF in Assemblies 19, 20 and 21; mutation confers hypersensitivity to toxic ergosterol analog; shows colony morphology-related gene regulation by Ssn6p
orf19.5488	1.23053	0.168258		Predicted ORF in Assemblies 19, 20 and 21
orf19.7548	1.23051	0.200174		Predicted ORF in Assemblies 19, 20 and 21
orf19.1054	1.22955	0.0204094		Predicted ORF in Assemblies 19, 20 and 21; possibly spurious ORF (Annotation Working Group prediction)
orf19.3247	1.22892	0.305601		Predicted ORF in Assemblies 19, 20 and 21; putative ortholog of S. cerevisiae Yjl207cp; likely to be essential for growth, based on an insertional mutagenesis strategy
orf19.3557	1.22718	0.408883		Predicted ORF in Assemblies 19, 20 and 21
orf19.6479	1.22692	0.146974		Predicted ORF in Assemblies 19, 20 and 21
orf19.2416.1	1.22669	0.00935611	MLC1	Protein with microtubule-dependent localization to the Spitzenkorper, also localizes to cytokinetic ring in hyphae; cell-cycle dependent localization to bud tip (polarisome) and bud neck in yeast and pseudohyphal cells
orf19.5213	1.22646	0.381537		Putative protein of unknown function, transcription is upregulated in clinical isolates from HIV+ patients with oral candidiasis; predicted ORF in Assemblies 19, 20 and 21
orf19.3579	1.22582	0.140935	ATP4	Predicted ORF in Assemblies 19, 20 and 21; macrophage/pseudohyphal-induced
orf19.658	1.22559	0.0560225	GIN1	Protein involved in regulation of DNA-damage-induced filamentous growth; putative component of DNA replication checkpoint; ortholog of S. cerevisiae Mrc1p, an S-phase checkpoint protein
orf19.7041	1.22557	0.0108039		Putative protein of unknown function; heterozygous null mutant exhibits hypersensitivity to parnafungin and cordycepin in the C. albicans fitness test; predicted ORF in Assemblies 19, 20 and 21
orf19.1351	1.22538	0.186349		Predicted ORF in Assemblies 19, 20 and 21
orf19.6694	1.22527	0.0411719		Predicted ORF in Assemblies 19, 20 and 21
orf19.3248	1.22509	0.035		Predicted ORF in Assemblies 19, 20 and 21
orf19.486	1.22503	0.0760067	NIP100	Predicted ORF in Assemblies 19, 20 and 21
orf19.7504	1.22479	0.0950792		Predicted ORF in Assemblies 19, 20 and 21; Plc1p-regulated; induced in core caspofungin response
orf19.725	1.22396	0.35955		Predicted ORF in Assemblies 19, 20 and 21
orf19.4966	1.22382	0.0217492		Protein not essential for viability; transcription is alkaline upregulated
orf19.270	1.22379	0.0347785		Predicted ORF in Assemblies 19, 20 and 21
orf19.6986	1.22359	0.471824		Predicted ORF in Assemblies 19, 20 and 21
orf19.3558	1.22348	0.0122114		Predicted ORF in Assemblies 19, 20 and 21
orf19.1655.3	1.22339	0.0192742		ORF Predicted by Annotation Working Group
orf19.6997	1.22313	0.379489		Predicted ORF in Assemblies 19, 20 and 21
orf19.7678	1.22294	0.111947		Predicted ORF in Assemblies 19, 20 and 21
orf19.7379	1.22288	0.0182053	FAA2	Predicted acyl CoA synthetase; expression is regulated upon white-opaque switching; transcription is upregulated in both intermediate and mature biofilms
orf19.2180	1.22263	0.186195		Predicted ORF in Assemblies 19, 20 and 21
orf19.2796	1.22244	0.106682		Predicted ORF in Assemblies 19, 20 and 21
orf19.4162	1.22153	0.0489208	MLH1	Predicted ORF in Assemblies 19, 20 and 21; cell-cycle regulated periodic mRNA expression
orf19.5648	1.22077	0.173189		Predicted ORF in Assemblies 19, 20 and 21
orf19.4830	1.2206	0.172779		Predicted ORF in Assemblies 19, 20 and 21
orf19.3390	1.22006	0.178578		Putative transcription factor with zinc finger DNA-binding motif; merged with orf19.684 in Assembly 20
orf19.6450	1.21986	0.209443		Predicted ORF in Assemblies 19, 20 and 21; possibly spurious ORF (Annotation Working Group prediction)
orf19.2530	1.21964	0.0830393		Predicted ORF in Assemblies 19, 20 and 21
orf19.5237	1.21963	0.338268		Predicted ORF in Assemblies 19, 20 and 21
orf19.5660	1.21948	0.0645808		Predicted ORF in Assemblies 19, 20 and 21
orf19.469	1.21912	0.196807	HST7	MAP kinase kinase, involved in signal transduction pathways for mating and hyphal growth; phosphorylates Cek1p; not required for wild-type virulence in mouse systemic infection; functional homolog of S. cerevisiae Ste7p
orf19.3600	1.2189	0.0422971		Predicted ORF in Assemblies 19, 20 and 21
orf19.5640	1.21887	0.416059	PEX5	Protein of the Pex5p family; required for PTS1-mediated peroxisomal protein import, fatty acid beta-oxidation; similar to S. cerevisiae Pas10p peroxisomal targeting receptor; macrophage/pseudohyphal-repressed
orf19.4400	1.21835	0.00667435		Predicted ORF in Assemblies 19, 20 and 21; possibly spurious ORF (Annotation Working Group prediction)
orf19.2844	1.21821	0.0435464		Predicted ORF in Assemblies 19, 20 and 21; induced in core caspofungin response
orf19.6269	1.21817	0.133931		Predicted ORF in Assemblies 19, 20 and 21
orf19.7288	1.21784	0.0787267		Predicted ORF in Assemblies 19, 20 and 21
orf19.7100	1.21772	0.220673		Predicted ORF in Assemblies 19, 20 and 21; possibly transcriptionally regulated upon hyphal formation
orf19.223	1.21738	0.308897		Predicted ORF in Assemblies 19, 20 and 21; increased expression in response to prostaglandins
orf19.4951	1.21728	0.00689477		Predicted ORF in Assemblies 19, 20 and 21; possibly spurious ORF (Annotation Working Group prediction)
orf19.4505	1.21693	0.0448415	ADH3	Expression is regulated upon white-opaque switching; induced by nitric oxide in yhb1 mutant
orf19.1625	1.2163	0.181664		Predicted ORF in Assemblies 19, 20 and 21; repressed by nitric oxide
orf19.806	1.21586	0.0406735	VMA7	Putative subunit of the V-ATPase complex, which is involved in control of vacuolar pH; highly similar to S. cerevisiae Vma7p; interacts with phosphatidylinositol 3-kinase Vps34p
orf19.2378	1.21557	0.100157		Predicted ORF in Assemblies 19, 20 and 21
orf19.6126	1.21554	0.0234889	KGD2	Protein described as dihydrolipoamide S-succinyltransferase; transcriptionally regulated by iron; expression greater in high iron
orf19.3366	1.21546	0.0143955	CSH3	Functional homolog of S. cerevisiae Shr3p, which is a chaperone specific for amino acid permeases; localized to ER; required for wild-type amino-acid responsive hyphal growth and for mouse systemic virulence; regulated by Gcn2p and Gcn4p
orf19.4382	1.21467	0.105239		Predicted ORF in Assemblies 19, 20 and 21
orf19.4200	1.21418	0.348024		Predicted ORF in Assemblies 19, 20 and 21
orf19.5249	1.21388	0.0782601		Predicted ORF in Assemblies 19, 20 and 21
orf19.2444	1.21336	0.189483	CHS7	Protein required for wild-type chitin synthase III activity; similar to (but not functional homolog of) S. cerevisiae Chs7p, which effects ER export of Chs3p; induced in homozygous cyr1 null mutant hyphae and ras1 yeast-form cells
orf19.6342	1.21309	0.0354937		Predicted ORF in Assemblies 19, 20 and 21
orf19.3697	1.21249	0.282863		Predicted ORF in Assemblies 19, 20 and 21
orf19.215	1.21244	0.0936036		Predicted ORF in Assemblies 19, 20 and 21
orf19.3637	1.21219	0.108216		Predicted ORF in Assemblies 19, 20 and 21
orf19.5035	1.21218	0.0306414		Predicted ORF in Assemblies 19, 20 and 21
orf19.3646	1.21162	0.136183	CTR1	Copper transporter; probably multimeric; transcribed if copper limited; induced by Mac1p, macrophage interaction, alkaline pH via Rim101p; 17-beta-estradiol downregulated; complements S. cerevisiae ctr1 ctr3 copper transport mutant
orf19.4543	1.2116	0.0245348	UGA2	Protein not essential for viability; similar to S. cerevisiae Uga2p, which is succinate semialdehyde dehydrogenase with a role in glutamate catabolism; transcription regulated by Mig1p, Tup1p, Gcn4p
orf19.1938	1.21153	0.0953359		Decreased transcription is observed in an azole-resistant strain that overexpresses CDR1 and CDR2; increased transcription is observed upon benomyl treatment
orf19.3698	1.21138	0.21584		Predicted ORF in Assemblies 19, 20 and 21; filament induced
orf19.2684	1.21138	0.335342		Predicted ORF in Assemblies 19, 20 and 21
orf19.2447	1.21129	0.032134		Predicted ORF in Assemblies 19, 20 and 21; decreased expression observed in an ssr1 homozygous null mutant
orf19.7070	1.21068	0.169752		ORF Predicted by Annotation Working Group
orf19.7521	1.2106	0.0263253	REP1	Protein involved in negative regulation of MDR1 transcription; mutants show increased resistance to azole drugs
orf19.4284	1.21045	0.400358	BUR2	Protein with similarity to S. cerevisiae Bur2p, contains a cyclin domain; not required for wild-type hyphal growth, adherence to buccal epithelial cells, or virulence in mouse systemic infection
orf19.4879.2	1.21037	0.150173	NTF2	ORF Predicted by Annotation Working Group; regulated by Ssn6p
orf19.7556	1.20974	0.294434		Predicted ORF in Assemblies 19, 20 and 21; possibly spurious ORF (Annotation Working Group prediction)
orf19.993	1.20973	0.348909		Predicted ORF in Assemblies 19, 20 and 21
orf19.3421.1	1.20966	0.351837		ORF Predicted by Annotation Working Group
orf19.7239	1.20955	0.124796		Predicted ORF in Assemblies 19, 20 and 21
orf19.1676	1.20952	0.307692		Predicted ORF in Assemblies 19, 20 and 21
orf19.4758	1.2095	0.13547		Predicted ORF in Assemblies 19, 20 and 21; alkaline downregulated
orf19.5852	1.20939	0.0992226		Predicted ORF in Assemblies 19, 20 and 21
orf19.5350	1.20908	0.0991766		Predicted ORF in Assemblies 19, 20 and 21
orf19.1021	1.20892	0.0218802		Predicted ORF from Assembly 19; removed from Assembly 20
orf19.4117	1.20873	0.344578		Protein not essential for viability
orf19.2600	1.20866	0.16466	SPC98	Predicted ORF in Assemblies 19, 20 and 21; periodic mRNA expression, peak at cell-cycle S/G2 phase
orf19.708	1.20827	0.55187		Predicted ORF in Assemblies 19, 20 and 21
orf19.6988	1.20814	0.0231675		Predicted ORF in Assemblies 19, 20 and 21
orf19.5297	1.2081	0.20589		Predicted ORF in Assemblies 19, 20 and 21
orf19.674	1.20782	0.0115971		Predicted ORF in Assemblies 19, 20 and 21
orf19.2734	1.20747	0.256516		Protein not essential for viability
orf19.5210	1.20654	0.0250437		Predicted ORF in Assemblies 19, 20 and 21
orf19.5131	1.20647	0.0654631		Predicted ORF in Assemblies 19, 20 and 21
orf19.1075	1.20631	0.0226498		Predicted ORF in Assemblies 19, 20 and 21; possibly spurious ORF (Annotation Working Group prediction)
orf19.6358	1.20629	0.00132668		Predicted ORF in Assemblies 19, 20 and 21
orf19.4642	1.20603	0.110255		Predicted ORF in Assemblies 19, 20 and 21
orf19.3994	1.20587	0.252297		Predicted ORF in Assemblies 19, 20 and 21
orf19.6177	1.20578	0.252		Predicted ORF in Assemblies 19, 20 and 21; possibly spurious ORF (Annotation Working Group prediction)
orf19.4533	1.20572	0.0309676		Predicted ORF in Assemblies 19, 20 and 21
orf19.415	1.2056	0.102915		Predicted ORF in Assemblies 19, 20 and 21
orf19.3209	1.20554	0.0602511	FGR42	Protein lacking an ortholog in S. cerevisiae; transposon mutation affects filamentous growth
orf19.6551	1.20536	0.0325507		Predicted ORF in Assemblies 19, 20 and 21
orf19.2933	1.20523	0.0486847		Predicted ORF in Assemblies 19, 20 and 21
orf19.446	1.20518	0.191791		Predicted ORF in Assemblies 19, 20 and 21; constitutive expression independent of MTL or white-opaque status; greater mRNA abundance observed in a cyr1 homozygous null mutant than in wild type; possibly spurious ORF (Annotation Working Group prediction)
orf19.3415	1.2047	0.198172	PTK2	Putative protein kinase of polyamine import; mutation confers hypersensitivity to high concentrations of tunicamycin; upregulated in biofilm
orf19.1570	1.20461	0.0975155	ERG7	2,3-epoxysqualene-lanosterol cyclase (lanosterol synthase), catalyzes the conversion of 2,3-oxidosqualene to lanosterol in sterol biosynthesis; fluconazole-induced
orf19.5876	1.20456	0.264563		Predicted ORF in Assemblies 19, 20 and 21; greater mRNA abundance observed in a cyr1 homozygous null mutant than in wild type; transcription is induced in response to alpha pheromone in SpiderM medium
orf19.17	1.20417	0.328742	SCP1	Predicted ORF in Assemblies 19, 20 and 21; constitutive expression independent of MTL or white-opaque status
orf19.68	1.20385	0.0350174		Predicted ORF from Assembly 19; removed from Assembly 20
orf19.4287	1.20384	0.197734		Predicted ORF in Assemblies 19, 20 and 21; clade-associated gene expression
orf19.5649	1.20354	0.181559		ORF Predicted by Annotation Working Group
orf19.3520	1.20354	0.00613121		Predicted ORF from Assembly 19; merged with orf19.5852 in Assembly 20
orf19.4030	1.20334	0.0517852		Predicted ORF in Assemblies 19, 20 and 21
orf19.3667	1.2033	0.077297		Predicted ORF in Assemblies 19, 20 and 21
orf19.5917.3	1.20328	0.0504577		ORF Predicted by Annotation Working Group
orf19.1492	1.20324	0.0223159	PRP39	Putative component of the U1 snRNP, involved in splicing; ortholog of S. cerevisiae PRP39; predicted ORF in Assemblies 19, 20 and 21
orf19.1086	1.20297	0.123001		Predicted ORF in Assemblies 19, 20 and 21
orf19.3448	1.20288	0.0888518		Predicted ORF in Assemblies 19, 20 and 21; ketoconazole-repressed; possibly spurious ORF (Annotation Working Group prediction)
orf19.974	1.2025	0.126045	ROT2	Alpha-glucosidase II, catalytic subunit, required for N-linked protein glycosylation and normal cell wall synthesis; alkaline downregulated
orf19.7244	1.20186	0.0365544		Predicted ORF in Assemblies 19, 20 and 21; induced by nitric oxide in yhb1 mutant
orf19.3429	1.2018	0.0282519	FGR47	Protein lacking an ortholog in S. cerevisiae; transposon mutation affects filamentous growth
orf19.6351	1.20177	0.0392968		Predicted ORF in Assemblies 19, 20 and 21
orf19.827	1.20173	0.0842021		Predicted ORF in Assemblies 19, 20 and 21; possibly spurious ORF (Annotation Working Group prediction)
orf19.4275	1.20147	0.164072	RAD9	Protein involved in regulation of DNA-damage-induced filamentous growth; putative component of DNA damage checkpoint; ortholog of S. cerevisiae Rad9p; transcription is induced in response to alpha pheromone in SpiderM medium
orf19.2514	1.20115	0.0930793		Predicted ORF in Assemblies 19, 20 and 21
orf19.1358	1.2011	0.271255	GCN4	Transcriptional activator of general amino acid control response; required for Efg1p-dependent pseudohyphal filament induction by amino acid starvation but not by serum; upregulated in the presence of human whole blood or PMN cells
orf19.7667	1.20101	0.286253	IAH1	Protein similar to S. cerevisiae Iah1p, which is involved in acetate metabolism; mutation confers hypersensitivity to tunicamycin; transposon mutation affects filamentous growth
orf19.4245	1.20097	0.029548		Predicted ORF in Assemblies 19, 20 and 21
orf19.5518	1.20095	0.0678537		Predicted ORF in Assemblies 19, 20 and 21
orf19.3229	1.20094	0.128535		Predicted ORF in Assemblies 19, 20 and 21
orf19.5814	1.20085	0.00476893		Predicted ORF in Assemblies 19, 20 and 21; possibly spurious ORF (Annotation Working Group prediction)
orf19.5963	1.20048	0.345772		Predicted ORF in Assemblies 19, 20 and 21
orf19.2055	1.20032	0.185503	NPL6	Putative nuclear protein localization factor; fungal-specific (no human or murine homolog)
orf19.3895	1.20002	0.0966238	CHT2	Chitinase; putative N-terminal catalytic domain, GPI anchor, O-mannosylated region, signal peptide; 3 N-glycosylation motifs; downregulated in core caspofungin response; induced in yeast-form cells; Cyr1p-, Efg1p-, pH-regulated
orf19.187	1.19965	0.241946		Predicted ORF in Assemblies 19, 20 and 21; merged with orf19.188 in Assembly 21
orf19.5521	1.19954	0.0567142	ISA1	Reported to have possible role in iron-sulfur cluster biogenesis or cytoplasm-to-mitochondrion iron transport; alkaline downregulated; transcriptionally regulated by iron; expression greater in high iron
orf19.3266	1.1995	0.0119537		Predicted ORF in Assemblies 19, 20 and 21
orf19.3884	1.19938	0.0473152	FGR50	Protein lacking an ortholog in S. cerevisiae; transposon mutation affects filamentous growth; possibly spurious ORF (Annotation Working Group prediction)
orf19.6511	1.19882	0.0335898	LIG1	tRNA ligase; functional homolog of S. cerevisiae Trl1p; fungal-specific (no human or murine homolog)
orf19.3458	1.19873	0.226959		Predicted ORF in Assemblies 19, 20 and 21
orf19.643	1.19869	0.00269641		Predicted ORF in Assemblies 19, 20 and 21
orf19.6480	1.19866	0.0966335		Predicted ORF in Assemblies 19, 20 and 21
orf19.3183	1.19862	0.0346218		Predicted ORF in Assemblies 19, 20 and 21; possibly spurious ORF (Annotation Working Group prediction)
orf19.5291	1.19833	0.0301441		Predicted ORF in Assemblies 19, 20 and 21
orf19.2893	1.19815	0.229756		Putative protein of unknown function, regulation correlates with clinical development of fluconazole resistance; transcription is upregulated in an RHE model of oral candidiasis; predicted ORF in Assemblies 19, 20 and 21
orf19.2663	1.19815	0.069853		Predicted ORF in Assemblies 19, 20 and 21
orf19.2131	1.19774	0.0473029		Predicted ORF in Assemblies 19, 20 and 21
orf19.3184	1.19762	0.167337		Predicted ORF in Assemblies 19, 20 and 21
orf19.2463	1.19756	0.292435	PRN2	Predicted ORF in Assemblies 19, 20 and 21; similar to pirin
orf19.6474	1.19754	0.0974305		Predicted ORF in Assemblies 19, 20 and 21
orf19.6315	1.19703	0.0291531		Predicted ORF in Assemblies 19, 20 and 21; possibly spurious ORF (Annotation Working Group prediction)
orf19.3780	1.19688	0.0497404		Protein likely to be essential for growth, based on an insertional mutagenesis strategy
orf19.5428	1.19668	0.0481527		Predicted ORF in Assemblies 19, 20 and 21; clade-associated gene expression
orf19.530	1.19663	0.150924		Protein not essential for viability; possibly spurious ORF (Annotation Working Group prediction)
orf19.5985	1.19652	0.203585		Predicted ORF in Assemblies 19, 20 and 21
orf19.27	1.19645	0.399641		Predicted ORF in Assemblies 19, 20 and 21; possibly spurious ORF (Annotation Working Group prediction)
orf19.1761	1.19578	0.0369904		Predicted ORF in Assemblies 19, 20 and 21
orf19.2791	1.19575	0.00524281		Predicted ORF in Assemblies 19, 20 and 21
orf19.6455	1.19569	0.0954523		Putative protein of unknown function, transcription is upregulated in clinical isolates from HIV+ patients with oral candidiasis; predicted ORF in Assemblies 19, 20 and 21
orf19.1771	1.19497	0.0488716		Predicted ORF in Assemblies 19, 20 and 21
orf19.3912	1.19478	0.271925	GLN3	GATA transcription factor involved in regulation of filamentous growth induced by nitrogen starvation; regulates transcription of Mep2p ammonium permease; regulated by Gcn2p and Gcn4p
orf19.5727	1.19398	0.00318446		Predicted ORF in Assemblies 19, 20 and 21; possibly spurious ORF (Annotation Working Group prediction)
orf19.4149	1.19395	0.0146225		Predicted ORF in Assemblies 19, 20 and 21
orf19.6588	1.19381	0.103312		Predicted ORF in Assemblies 19, 20 and 21
orf19.6550	1.19381	0.0123512		Predicted ORF in Assemblies 19, 20 and 21
orf19.7426	1.19358	0.0435509		Predicted ORF in Assemblies 19, 20 and 21
orf19.1318	1.19357	0.0517653		Predicted ORF in Assemblies 19, 20 and 21
orf19.6601.1	1.19339	0.238952	YKE2	Possible cytoskeletal modulator; transcription induced upon yeast-to-hyphal switch; regulated by Nrg1p, Tup1p
orf19.4044	1.19334	0.0466044	MUM2	Protein similar to S. cerevisiae Mum2p; transcription is induced in response to alpha pheromone in SpiderM medium; transcription is regulated by Tup1p
orf19.7049	1.19316	0.378424	CYB5	Cytochrome b(5); not essential for viability; similar to S. cerevisiae Cyb5p; transcriptionally regulated by iron; expression greater in high iron; fluconazole-induced; shows colony morphology-related gene regulation by Ssn6p
orf19.2046	1.19273	0.0973209	POT1-2	Putative peroxisomal 3-ketoacyl CoA thiolase
orf19.3774.1	1.19251	0.115694		ORF Predicted by Annotation Working Group
orf19.3565	1.19248	0.113307		Predicted ORF in Assemblies 19, 20 and 21
orf19.3685	1.19226	0.30984	PSY2	Predicted ORF in Assemblies 19, 20 and 21; macrophage-induced gene
orf19.3591	1.19222	0.398594	APE3	Predicted ORF in Assemblies 19, 20 and 21; regulated by Gcn2p and Gcn4p
orf19.3115	1.19217	0.421003		Predicted ORF in Assemblies 19, 20 and 21; possibly spurious ORF (Annotation Working Group prediction)
orf19.3758	1.19212	0.0699467		Predicted ORF in Assemblies 19, 20 and 21
orf19.7527	1.19205	0.0140778		Predicted ORF in Assemblies 19, 20 and 21
orf19.1342	1.19188	0.39189	SHM1	Mitochondrial serine hydroxymethyltransferase; complements the glycine auxotrophy of an S. cerevisiae shm1 null shm2 null gly1-1 triple mutant; protein detected by mass spec in exponential and stationary phase cultures
orf19.2091	1.19177	0.0524532		Predicted ORF in Assemblies 19, 20 and 21; repressed by nitric oxide
orf19.31	1.19177	0.0280086		Predicted ORF in Assemblies 19, 20 and 21
orf19.6527	1.19158	0.203162		Predicted ORF in Assemblies 19, 20 and 21; shows colony morphology-related gene regulation by Ssn6p; transcriptionally activated by Mnl1p under weak acid stress
orf19.4167	1.19147	0.0813154		Predicted ORF in Assemblies 19, 20 and 21
orf19.5851	1.19113	0.0890563	STE13	Protein similar to S. cerevisiae Ste13p, which is a pheromone-processing dipeptidyl aminopeptidase; possible Kex2p substrate; transposon mutation affects filamentous growth; induced by low nitrogen, germ tube formation
orf19.7190	1.19053	0.268988	OGG1	Ortholog of S. cerevisiae OGG1, which encodes a mitochondrial DNA glycosylase/lyase involved in base excision repair; predicted ORF in Assemblies 19, 20 and 21
orf19.7565	1.19052	0.0157754	GNP3	Putative high-affinity glutamine permease; fungal-specific (no human or murine homolog)
orf19.4439.1	1.19037	0.00795541		ORF Predicted by Annotation Working Group
orf19.1805	1.19017	0.0382012	PEX14	Protein not essential for viability; similar to S. cerevisiae Pex14p, which is a peroxisomal protein involved in import of peroxisomal matrix proteins
orf19.1162	1.19001	0.109487		Predicted ORF in Assemblies 19, 20 and 21; increased transcription is observed upon benomyl treatment
orf19.7194	1.18991	0.15624		Protein not essential for viability; decreased transcription is observed upon fluphenazine treatment; induced upon adherence to polystyrene
orf19.4662	1.18956	0.151496	RLM1	Putative transcription factor; required for wild-type resistance to cell wall perturbation, caspofungin treatment; regulates caspofungin induction of PGA13
orf19.4123	1.18946	0.278922		Predicted ORF in Assemblies 19, 20 and 21
orf19.4657	1.18939	0.305818		Predicted ORF in Assemblies 19, 20 and 21
orf19.4841	1.18923	0.152674	SHY1	Transcription is regulated by Nrg1p and Mig1p
orf19.745	1.1891	0.0323721	VAC8	Protein involved in vacuolar inheritance; required for hyphal growth; contains armadillo repeats
orf19.3203	1.18861	0.066638	RCY1	Putative F-box protein involved in endocytic membrane traffic and/or recycling; fungal-specific (no human or murine homolog)
orf19.3230	1.18861	0.00919537	BOI2	Predicted ORF in Assemblies 19, 20 and 21; mutation confers hypersensitivity to toxic ergosterol analog
orf19.3639	1.18859	0.0161401		Predicted ORF in Assemblies 19, 20 and 21
orf19.3571	1.18847	0.0762542		Predicted ORF in Assemblies 19, 20 and 21
orf19.1251	1.18829	0.42448	BRN1	Predicted ORF in Assemblies 19, 20 and 21; cell-cycle regulated periodic mRNA expression
orf19.213	1.18797	0.411167		Predicted ORF in Assemblies 19, 20 and 21
orf19.3234	1.18787	0.00640397	OYE22	Predicted ORF in Assemblies 19, 20 and 21; transcription is upregulated in both intermediate and mature biofilms
orf19.248	1.187	0.286217	APL5	Phosphorylated protein, not essential for viability; similar to S. cerevisiae Apl5p, which is a subunit of the AP-3 adaptor complex involved in Golgi-to-vacuole transport
orf19.5326	1.18688	0.0213935		Putative transcription factor with zinc finger DNA-binding motif; possible ortholog of S. cerevisiae Mig2p
orf19.184	1.1867	0.0125279		Predicted ORF in Assemblies 19, 20 and 21
orf19.7095	1.18665	0.185145		Predicted ORF in Assemblies 19, 20 and 21
orf19.1384	1.1866	0.107975		Predicted ORF from Assembly 19; merged with orf19.1383 in Assembly 20
orf19.3278	1.18621	0.258852	GSY1	Protein described as glycogen synthase; enzyme of glycogen metabolism; transcription downregulated upon yeast-hyphal switch and regulated by Efg1p; strong oxidative stress induced; shows colony morphology-related gene regulation by Ssn6p
orf19.4534	1.18598	0.0411079		Predicted ORF in Assemblies 19, 20 and 21; macrophage-downregulated gene
orf19.7450	1.18557	0.324255		Predicted ORF in Assemblies 19, 20 and 21
orf19.691	1.18504	0.0071942	GPD2	Similar to glycerol 3-P dehydrogenases; regulated by Ssn6p (colony morphology-related), Nrg1p, Efg1p; induced upon osmotic and oxidative stress (via Hog1p), cell wall regeneration, macrophage/pseudohyphal growth, core stress response
orf19.3256	1.1849	0.0204153	SLN1	Histidine kinase involved in a two-component signaling pathway that regulates cell wall biosynthesis
orf19.7157	1.18489	0.333808		Predicted ORF in Assemblies 19, 20 and 21
orf19.4509	1.18421	0.0518539		Predicted ORF in Assemblies 19, 20 and 21
orf19.3176	1.18419	0.0236595	RIM21	Protein involved in the pH response pathway; required for activation of the transcription factor Rim101p and for alkaline pH-induced hyphal growth; may function as a sensor of alkaline pH
orf19.1203	1.18394	0.213005	SRO77	Predicted ORF in Assemblies 19, 20 and 21; filament induced; fungal-specific (no human or murine homolog)
orf19.457	1.18387	0.255903		Predicted ORF in Assemblies 19, 20 and 21
orf19.1619	1.18371	0.16198		Predicted ORF in Assemblies 19, 20 and 21
orf19.1650	1.18366	0.120117		Predicted ORF in Assemblies 19, 20 and 21
orf19.1681	1.18328	0.342393		Predicted ORF in Assemblies 19, 20 and 21
orf19.477	1.18319	0.174065		Predicted ORF in Assemblies 19, 20 and 21
orf19.1576	1.18299	0.329997		Predicted ORF in Assemblies 19, 20 and 21
orf19.4163	1.18276	0.100275		Predicted ORF in Assemblies 19, 20 and 21
orf19.5510	1.18257	0.207884		Predicted ORF in Assemblies 19, 20 and 21
orf19.2236	1.18238	1.83793e-05		Protein with forkhead domain; similar to Fhl1p
orf19.4591	1.18228	0.0258921	CAT2	Major carnitine acetyl transferase localized in peroxisomes and mitochondria; involved in intracellular acetyl-CoA transport; transcriptionally induced in macrophage; farnesol-upregulated in biofilm; Hog1p-downregulated
orf19.81	1.18225	0.252042		Predicted ORF in Assemblies 19, 20 and 21
orf19.7347	1.18225	0.258307		Predicted ORF in Assemblies 19, 20 and 21
orf19.2611	1.18175	0.0965133	MCM6	Protein described as part of MCM DNA replication initiation complex; mRNA expression, peak at cell-cycle M/G1 phase; regulated by tyrosol and cell density; repressed in response to alpha pheromone in SpiderM medium
orf19.3142	1.18168	0.148439		Predicted ORF in Assemblies 19, 20 and 21
orf19.2376	1.18168	0.0269055		Predicted ORF in Assemblies 19, 20 and 21
orf19.7295	1.1816	0.33986		Predicted ORF in Assemblies 19, 20 and 21
orf19.981	1.18147	0.254133		Predicted ORF from Assembly 19; merged with orf19.4911 in Assembly 20
orf19.4466	1.18146	0.0563422		Predicted ORF in Assemblies 19, 20 and 21
orf19.7209	1.18145	0.0751314		Predicted ORF in Assemblies 19, 20 and 21; induced by nitric oxide in yhb1 mutant
orf19.1456	1.18136	0.379195		ORF Predicted by Annotation Working Group; possibly spurious ORF (Annotation Working Group prediction)
orf19.5142	1.18132	0.0477345	DFR1	Dihydrofolate reductase; trimethoprim resistant; DHFR reduces 7,8-dihydrofolate to 5,4,7,8-tetrahydrofolate; binds NADPH; target of drugs that selectively inhibit the fungal enzyme rather than the human enzyme
orf19.3449	1.18124	0.286571		Predicted ORF in Assemblies 19, 20 and 21
orf19.2886	1.18094	0.500267	CEK1	ERK-family protein kinase, required for wild-type yeast-hyphal switching, mating efficiency, and virulence in a mouse model; Cst20p-Hst7p-Cek1p-Cph1p MAPK pathway regulates mating, and invasive hyphal growth under some conditions
orf19.4593	1.18086	0.401003	RGA2	Putative GTPase-activating protein (GAP) for Rho-type GTPase Cdc42p; involved in cell signaling pathways that control cell polarity; similar to S. cerevisiae Rga2p; induced upon low-level peroxide stress
orf19.1237	1.18065	0.0736245	ARO9	Aromatic transaminase of the Ehrlich fusel oil pathway of aromatic alcohol biosynthesis; Rim101p-dependent pH-regulation (alkaline induced)
orf19.2622	1.18039	0.109274	YPT31	Predicted ORF in Assemblies 19, 20 and 21 (see Locus History Note for Assembly 19 correction); mutation confers hypersensitivity to toxic ergosterol analog
orf19.4379	1.18034	0.0707628	PRP13	Predicted ORF in Assemblies 19, 20 and 21; fungal-specific (no human or murine homolog)
orf19.193	1.18024	0.0128782		Predicted ORF in Assemblies 19, 20 and 21; possibly spurious ORF (Annotation Working Group prediction)
orf19.1203.1	1.17993	0.0121463		ORF Predicted by Annotation Working Group
orf19.2315	1.17932	0.177742		Putative transcription factor with bZIP DNA-binding motif
orf19.3516	1.17906	0.227386		Predicted ORF in Assemblies 19, 20 and 21
orf19.6583	1.1788	0.113781		Predicted ORF in Assemblies 19, 20 and 21; transcription is induced in response to alpha pheromone in SpiderM medium
orf19.1486	1.17834	0.321086		Predicted ORF in Assemblies 19, 20 and 21; possibly spurious ORF (Annotation Working Group prediction)
orf19.1228	1.17796	0.261221	HAP2	CCAAT-binding factor regulates low-iron (chelation) induction of FRP1 transcription, and under these conditions CBF comprises Hap43p and probably Hap2p and Hap3p
orf19.697	1.17795	0.169293		Predicted ORF in Assemblies 19, 20 and 21
orf19.5626	1.17728	0.290939		Predicted ORF in Assemblies 19, 20 and 21; Plc1p-regulated; transcriptionally activated by Mnl1p under weak acid stress
orf19.5239	1.17704	0.312868		Predicted ORF in Assemblies 19, 20 and 21; oxidative stress-induced via Cap1p
orf19.597	1.17688	0.216645		Predicted ORF in Assemblies 19, 20 and 21; Gcn4p-regulated
orf19.3730	1.17671	0.0880145		Protein similar to S. cerevisiae Kre27p, which has a role in resistance to killer toxin; predicted Kex2p substrate
orf19.252	1.1763	0.0183156		Predicted ORF in Assemblies 19, 20 and 21
orf19.1712	1.17607	0.0151689	GEA2	Protein described as an ARF GTP/GDP exchange factor; transcriptionally regulated by iron; expression greater in low iron
orf19.2184	1.17585	0.00859122		Predicted ORF in Assemblies 19, 20 and 21; clade-associated gene expression
orf19.1500	1.17506	0.00702478		Predicted ORF in Assemblies 19, 20 and 21
orf19.1666	1.17476	0.404784		Predicted ORF in Assemblies 19, 20 and 21; transcription is induced in response to alpha pheromone in SpiderM medium
orf19.4150	1.17468	0.0995588		Predicted ORF in Assemblies 19, 20 and 21; induced by nitric oxide
orf19.6470	1.17458	0.00862627	AHP2	Predicted ORF in Assemblies 19, 20 and 21; macrophage-downregulated gene
orf19.459	1.17434	0.0469573	ADP1	Putative PDR-subfamily ABC transporter; similar to WHITE subfamily proteins; gene used for strain identification by multilocus sequence typing
orf19.940	1.17426	0.130692	BUD2	GTPase activating protein (GAP) for Rsr1p; negative regulator of filament branching, acts in hyphal growth guidance; required for wild-type budding pattern; expression greater in low iron; regulated by tyrosol and cell density
orf19.4776	1.17422	0.12553		Putative transcription factor with zinc cluster DNA-binding motif; has similarity to S. cerevisiae Lys14p, which is a transcription factor involved in the regulation of lysine biosynthesis genes
orf19.1024	1.17392	0.0696582		Predicted ORF from Assembly 19; removed from Assembly 20
orf19.2282	1.17384	0.0427073		Predicted ORF in Assemblies 19, 20 and 21
orf19.3466	1.17332	0.0160779		Predicted ORF in Assemblies 19, 20 and 21; decreased transcription is observed upon fluphenazine treatment or in an azole-resistant strain that overexpresses CDR1 and CDR2
orf19.3829	1.17332	0.0475423	PHR1	Glycosidase of cell surface; may act on cell-wall beta-1,3-glucan prior to beta-1,6-glucan linkage; E169 and E270 at active site; role in systemic but not vaginal virulence (neutral, not low pH); high pH or filamentation induced
orf19.226	1.17322	0.334099		Predicted ORF from Assembly 19; removed from Assembly 20
orf19.6265	1.17313	0.131754	RPS22A	Predicted ribosomal protein; genes encoding cytoplasmic ribosomal subunits, translation factors, and tRNA synthetases are downregulated upon phagocytosis by murine macrophage
orf19.3083	1.17285	0.128899		Predicted ORF in Assemblies 19, 20 and 21
orf19.4369	1.17252	0.00898527		Protein not essential for viability
orf19.5830	1.17224	0.15782		Protein similar to S. cerevisiae Hsp70p; predicted Kex2p substrate
orf19.5487	1.17202	0.0697757	CDC46	Protein described as having role in control of cell division; periodic mRNA expression, peak at cell-cycle M/G1 phase; regulated by tyrosol and cell density; Plc1p-regulated; repressed in response to alpha pheromone in SpiderM medium
orf19.1386	1.172	0.15362		Predicted ORF in Assemblies 19, 20 and 21
orf19.6048	1.17197	0.0774731		Predicted ORF in Assemblies 19, 20 and 21
orf19.5022	1.17186	0.173752		Predicted ORF in Assemblies 19, 20 and 21
orf19.1607	1.17181	0.289665	ALR1	Putative transporter of divalent cations; hyphal-induced expression; fungal-specific (no human or murine homolog)
orf19.1396	1.17173	0.0331679		Predicted ORF in Assemblies 19, 20 and 21
orf19.2440	1.17159	0.0749508		Predicted ORF in Assemblies 19, 20 and 21; transcription is induced in response to alpha pheromone in SpiderM medium
orf19.2438	1.1712	0.204109		Predicted ORF in Assemblies 19, 20 and 21
orf19.3443	1.17115	0.208443	OYE2	Putative NAPDH dehydrogenase; fungal-specific (no human or murine homolog); induced by nitric oxide
orf19.5509.2	1.17096	0.171998		ORF Predicted by Annotation Working Group; removed from Assembly 20
orf19.4244	1.17076	0.0134126		Protein not essential for viability
orf19.6487	1.17056	0.242564		Predicted ORF in Assemblies 19, 20 and 21
orf19.2826	1.17054	0.240481		Predicted ORF in Assemblies 19, 20 and 21
orf19.1092	1.17051	0.020594		Predicted ORF in Assemblies 19, 20 and 21
orf19.6601	1.17041	0.322161		Predicted ORF in Assemblies 19, 20 and 21; possibly spurious ORF (Annotation Working Group prediction)
orf19.5008.1	1.17034	0.298213		ORF Predicted by Annotation Working Group
orf19.1779	1.17031	0.207151	MP65	Cell surface mannoprotein; mycelial antigen; possible role in cell-wall glucan metabolism; has adhesin motif; O-glycosylation but no predicted N-glycosylation; induced by heat, upon germ tube formation, wall regeneration; diagnostic marker
orf19.4476	1.17019	0.412428		Predicted ORF in Assemblies 19, 20 and 21
orf19.4003	1.16983	0.226029	TIP20	Protein interacting with Sec20p, possibly involved in retrograde transport between the Golgi and the endoplasmic reticulum; similar to S. cerevisiae Tip20p
orf19.3047	1.16979	0.140438		Predicted ORF in Assemblies 19, 20 and 21
orf19.6612	1.16928	0.21559		Predicted ORF in Assemblies 19, 20 and 21
orf19.5013	1.16906	0.45546	AGM1	Phosphoacetylglucosamine mutase (N-acetylglucosamine-phosphate mutase); enzyme of UDP-N-acetylglucosamine (UDP-GlcNAc) biosynthesis
orf19.3759	1.16903	0.0782562		Predicted ORF in Assemblies 19, 20 and 21
orf19.6731.1	1.16888	0.0447062		ORF Predicted by Annotation Working Group
orf19.5735	1.16885	0.18541	CDC50	Predicted ORF in Assemblies 19, 20 and 21; transcriptionally activated by Mnl1p under weak acid stress
orf19.6920	1.16881	0.190829		Predicted ORF in Assemblies 19, 20 and 21; induced upon biofilm formation; possibly spurious ORF (Annotation Working Group prediction)
orf19.99	1.16875	0.115644	HAL21	Putative phosphoadenosine-5'-phosphate (PAP) or 3'-phosphoadenosine 5'-phosphosulfate (PAPS) phosphatase; possible role in sulfur recycling; biofilm induced; similar to S. cerevisiae Met22p; predicted Kex2p substrate; fungal-specific
orf19.5371	1.16868	0.106498		Predicted ORF from Assembly 19; removed from Assembly 20
orf19.6931	1.16757	0.356483		Putative protein of unknown function; heterozygous null mutant exhibits hypersensitivity to parnafungin and cordycepin in the C. albicans fitness test; predicted ORF in Assemblies 19, 20 and 21
orf19.1229	1.16679	0.269286		Predicted ORF in Assemblies 19, 20 and 21
orf19.7042	1.1665	0.492628		Increased transcription is observed upon benomyl treatment or in an azole-resistant strain that overexpresses MDR1; induced by nitric oxide
orf19.3700	1.16642	0.398731	TOM70	Protein described as mitochondrial import receptor
orf19.6598	1.16632	0.0617526	WAL1	Protein required for hyphal growth and for wild-type cell morphology, polarized budding, endocytosis, vacuole morphology; similar to Wiskott-Aldrich syndrome protein; localizes to cortical actin patches and hyphal tips
orf19.7492	1.16613	0.340265	SWC4	Subunit of the NuA4 histone acetyltransferase complex
orf19.1605	1.16611	0.341353	PMS1	Protein described as DNA mismatch repair factor; ortholog of S. cerevisiae PMS1 which is an ATP-binding protein involved in DNA mismatch repair
orf19.1349	1.16597	0.00106579		Predicted ORF in Assemblies 19, 20 and 21; possibly spurious ORF (Annotation Working Group prediction)
orf19.4583	1.16592	0.152579		Predicted ORF in Assemblies 19, 20 and 21
orf19.4014	1.16576	0.392977		Predicted ORF in Assemblies 19, 20 and 21; described as similar to S. cerevisiae Cdc1p; induced upon adherence to polystyrene
orf19.6813	1.16559	0.0255357		Predicted ORF in Assemblies 19, 20 and 21; possibly spurious ORF (Annotation Working Group prediction)
orf19.3720	1.16557	0.0582484		Predicted ORF in Assemblies 19, 20 and 21
orf19.5666	1.16555	0.338181		Predicted ORF in Assemblies 19, 20 and 21
orf19.6001	1.16532	0.243505	SAP3	Secreted aspartyl proteinase; acts in utilization of protein as nitrogen source; virulence role in mouse, guinea pig systemic infection or rat vagina; regulated by growth phase; produced by opaque phase cells; alpha-pheromone repressed
orf19.3963	1.16509	0.0398528		Predicted ORF in Assemblies 19, 20 and 21
orf19.6884	1.16503	0.160836		Predicted ORF in Assemblies 19, 20 and 21
orf19.5534	1.16502	0.0833434		Predicted ORF in Assemblies 19, 20 and 21
orf19.3269	1.16484	0.115593	GSL2	Protein similar to beta-1,3-glucan synthase; 16 predicted membrane-spanning regions; transcription regulated by Nrg1p; very low gene expression in yeast-form and hyphal cells
orf19.5214	1.1645	0.245018	VPS33	Predicted ORF in Assemblies 19, 20 and 21; similar to S. cerevisiae Vps33p, which is the product of a class C vacuolar protein sorting (vps) gene
orf19.2242	1.16448	0.29988	PRB1	Putative endoprotease B; regulated by heat, carbon source (GlcNAc-induced), nitrogen, macrophage response, human neutrophils; putative D200-H232-S389 catalytic triad; similar to (but does not replace) S. cerevisiae vacuolar B protease Prb1p
orf19.2113	1.16434	0.419201		Predicted ORF in Assemblies 19, 20 and 21
orf19.6885	1.16429	0.0929513	SPO7	Protein similar to S. cerevisiae Spo7p; transcription is induced in response to alpha pheromone in SpiderM medium
orf19.3689	1.16423	0.083642		Predicted ORF in Assemblies 19, 20 and 21; decreased expression observed in an ssr1 homozygous null mutant
orf19.7670	1.16399	0.173013		Putative Ca2+/H+ antiporter; fungal-specific (no human or murine homolog)
orf19.7372	1.16367	0.0319348	MRR1	Regulator of MDR1 transcription; zinc-finger protein; gain-of-function mutations cause upregulation of MDR1 (which encodes plasma membrane multidrug efflux pump) and consequent multidrug resistance
orf19.4025	1.1636	0.0792944	PRE1	Upregulated by Rim101p at acid pH; flucytosine induced; amphotericin B repressed
orf19.1639	1.16354	0.143464		Predicted ORF in Assemblies 19, 20 and 21
orf19.5342	1.16348	0.412133		Predicted ORF in Assemblies 19, 20 and 21; fungal-specific (no human or murine homolog)
orf19.7023	1.16343	0.309729		Predicted ORF in Assemblies 19, 20 and 21; oxidative stress-induced via Cap1p
orf19.3474	1.16335	0.0223812	IPL1	Predicted ORF in Assemblies 19, 20 and 21; induced during planktonic growth
orf19.2768	1.16327	0.30393	AMS1	Putative alpha-mannosidase; transcription is regulated by Nrg1p; induced during cell wall regeneration
orf19.1946	1.16325	0.28792		Similar to an aldose 1-epimerase-related protein; antigenic during murine systemic infection; protein detected by mass spec in exponential and stationary phase cultures
orf19.3394	1.16317	0.0733158		Predicted ORF in Assemblies 19, 20 and 21; transcription is induced in response to alpha pheromone in SpiderM medium
orf19.5110	1.1631	0.294816	OPY2	Predicted ORF in Assemblies 19, 20 and 21
orf19.1711	1.16256	0.108119	END3	Regulated by Gcn4p; induced in response to amino acid starvation (3-aminotriazole treatment)
orf19.7024	1.16252	0.00626206		Predicted ORF in Assemblies 19, 20 and 21
orf19.2910	1.16248	0.136017	PGA43	Putative GPI-anchored protein of unknown function
orf19.5258	1.16235	0.0611728		Predicted ORF in Assemblies 19, 20 and 21; induced by nitric oxide
orf19.3877	1.16222	0.106397		Predicted ORF in Assemblies 19, 20 and 21; previously merged with orf19.3878; unmerged from orf19.3878 in a revision of Assembly 21
orf19.7572	1.16214	0.416807	SPT7	Predicted ORF in Assemblies 19, 20 and 21; mutation confers hypersensitivity to toxic ergosterol analog, and to amphotericin B
orf19.4596	1.16214	0.58178		Predicted ORF in Assemblies 19, 20 and 21
orf19.4954	1.16211	0.031284		Predicted ORF in Assemblies 19, 20 and 21
orf19.3136	1.16181	0.0103684		Predicted ORF in Assemblies 19, 20 and 21
orf19.7275	1.16179	0.0028989	FGR24	Protein encoded in retrotransposon Zorro2 with similarity to retroviral endonuclease-reverse transcriptase proteins; lacks an ortholog in S. cerevisiae; transposon mutation affects filamentous growth
orf19.4720	1.16173	0.259483	CTR2	Predicted ORF in Assemblies 19, 20 and 21; induced by nitric oxide; clade-associated gene expression
orf19.2748	1.16172	0.112848		Predicted zinc-finger protein of unknown function; clade-associated gene expression; similarity to S. cerevisiae Arg81p, which is a transcription factor involved in the regulation of arginine-responsive genes
orf19.4011	1.16132	0.0819168		Predicted ORF in Assemblies 19, 20 and 21
orf19.4147	1.16132	0.1498	GLR1	Glutathione reductase; transcriptionally regulated by Cap1p; upregulated in the presence of human neutrophils; oxidative stress-induced via Cap1p; overexpression correlates with multidrug resistance in a cap1 mutant, farnesol induced
orf19.427	1.16118	0.0170408		Predicted ORF in Assemblies 19, 20 and 21
orf19.4728	1.16107	0.0461281		Predicted ORF in Assemblies 19, 20 and 21
orf19.3074	1.16106	0.367075	TLO10	Member of a family of telomere-proximal genes of unknown function
orf19.4153	1.16105	0.242442		Predicted ORF in Assemblies 19, 20 and 21
orf19.6632	1.16084	0.305718	ACO2	Protein described as aconitate hydratase 2; regulated by Gcn4p; repressed in response to amino acid starvation (3-aminotriazole treatment); transcriptionally regulated by iron; expression greater in high iron
orf19.7044	1.1606	0.0386098		Predicted ORF in Assemblies 19, 20 and 21
orf19.861	1.16029	0.232245		Predicted transcriptional regulator with bZip domain
orf19.2739	1.16006	0.152576		Predicted ORF in Assemblies 19, 20 and 21
orf19.7196	1.15994	0.329385		Protein described as a vacuolar protease; upregulated in the presence of human neutrophils
orf19.2095	1.15955	0.17699		Predicted ORF in Assemblies 19, 20 and 21
orf19.3235	1.1594	0.452747		Predicted ORF in Assemblies 19, 20 and 21
orf19.4718	1.15932	0.247054	TRP5	Predicted tryptophan synthase; Gcn4p-regulated; upregulated in biofilm; identified in detergent-resistant membrane fraction (possible lipid raft component); predicted N-terminal acetylation; S. cerevisiae ortholog is Gcn4p regulated
orf19.836.1	1.15916	0.413088		ORF Predicted by Annotation Working Group
orf19.1372	1.15915	0.393949		Gene transcription regulated by Mig1p and Tup1p
orf19.3740	1.15901	0.116628	PGA23	Putative GPI-anchored protein of unknown function; transcription is negatively regulated by Rim101p; regulated by Cyr1p; shows colony morphology-related gene regulation by Ssn6p
orf19.4510	1.1589	0.0553796	IFA4	Predicted ORF in Assemblies 19, 20 and 21; oxidative stress-induced via Cap1p
orf19.3214	1.15849	0.146144		Predicted ORF in Assemblies 19, 20 and 21; possibly spurious ORF (Annotation Working Group prediction)
orf19.6169	1.15841	0.0147092		Predicted ORF in Assemblies 19, 20 and 21; induced by Rgt1p
orf19.1893	1.1581	0.103856		Predicted ORF in Assemblies 19, 20 and 21
orf19.2190	1.15801	0.218447	VRP1	Protein described as verprolin; downregulated upon adherence to polystyrene
orf19.6246	1.15789	0.395392		Predicted ORF in Assemblies 19, 20 and 21
orf19.5782	1.1576	0.394776		Predicted ORF in Assemblies 19, 20 and 21
orf19.670	1.15758	0.0286352	SMT3	SUMO, small ubiquitin-like protein; Smt3p-conjugated proteins localize to septation site and mother side of bud neck; C. albicans septins appear not to be Smt3p-modified, in contrast to S. cerevisiae septins; similar to S. cerevisiae Smt3p
orf19.4169	1.15743	0.184758		Predicted ORF in Assemblies 19, 20 and 21; possibly spurious ORF (Annotation Working Group prediction)
orf19.6027	1.15734	0.212082		Predicted ORF in Assemblies 19, 20 and 21
orf19.3970	1.15732	0.0304137		Predicted ORF in Assemblies 19, 20 and 21
orf19.4634	1.15709	0.146089		Predicted ORF in Assemblies 19, 20 and 21
orf19.29	1.15687	0.14203		Predicted ORF in Assemblies 19, 20 and 21
orf19.4465	1.15684	0.231565		Predicted ORF in Assemblies 19, 20 and 21; possibly spurious ORF (Annotation Working Group prediction)
orf19.740	1.15655	0.531994	HAP41	Predicted ORF in Assemblies 19, 20 and 21; not required for response to low iron; possibly spurious ORF (Annotation Working Group prediction); transcriptionally activated by Mnl1p under weak acid stress
orf19.7436.1	1.15616	0.0937684	ECM15	ORF Predicted by Annotation Working Group; caspofungin repressed
orf19.7454	1.15594	0.259677	TAF60	Predicted ORF in Assemblies 19, 20 and 21; mutation confers hypersensitivity to amphotericin B
orf19.538	1.15593	0.0732362		Predicted ORF in Assemblies 19, 20 and 21
orf19.7067	1.15569	0.428293		Predicted ORF in Assemblies 19, 20 and 21
orf19.20	1.1556	0.0255491	RTS1	Transcription is regulated upon yeast-hyphal switch
orf19.5495	1.15543	0.21626		Protein not essential for viability; transcription is induced in response to alpha pheromone in SpiderM medium
orf19.3148	1.15527	0.191195		Predicted ORF in Assemblies 19, 20 and 21
orf19.69.2	1.15513	0.357867		ORF Predicted by Annotation Working Group
orf19.2342	1.15486	0.169256	SFT2	Transcription is regulated by Mig1p
orf19.4221	1.15449	0.0123337	ORC4	Phosphorylated protein similar to S. cerevisiae Orc4p; transcription is induced in response to alpha pheromone in SpiderM medium
orf19.1881	1.15412	0.155719		Predicted ORF in Assemblies 19, 20 and 21
orf19.4620	1.15408	0.0846053		Predicted ORF in Assemblies 19, 20 and 21
orf19.4761	1.15359	0.263495		Predicted ORF in Assemblies 19, 20 and 21
orf19.2574	1.15358	0.203629		Predicted ORF in Assemblies 19, 20 and 21
orf19.6760	1.15356	0.0361054	MDS3	Component of an alkaline pH-response pathway distinct from the Rim101p pathway, required for growth and hyphal formation at pH 9 and for full virulence in a mouse model of systemic infection; has a role in chlamydospore formation
orf19.3831	1.15353	0.0802246		Predicted ORF in Assemblies 19, 20 and 21
orf19.4069	1.15353	0.356229		Predicted ORF in Assemblies 19, 20 and 21; transcription is repressed in response to alpha pheromone in SpiderM medium
orf19.314	1.15349	0.34109		Predicted ORF in Assemblies 19, 20 and 21
orf19.6482	1.15349	0.111019		Predicted ORF in Assemblies 19, 20 and 21; induced by nitric oxide in yhb1 mutant; possibly spurious ORF (Annotation Working Group prediction)
orf19.5300	1.15328	0.299738		Predicted ORF in Assemblies 19, 20 and 21; caspofungin induced
orf19.3237	1.15316	0.172329		Predicted ORF in Assemblies 19, 20 and 21
orf19.7017	1.15298	0.00756247	YOX1	Predicted ORF in Assemblies 19, 20 and 21; periodic mRNA expression, peak at cell-cycle G1/S phase
orf19.2735	1.15279	0.366345	SEN2	Predicted ORF in Assemblies 19, 20 and 21; mutation confers hypersensitivity to toxic ergosterol analog, and to amphotericin B; has intron in 5'-UTR
orf19.2650	1.15275	0.0186099		Predicted ORF in Assemblies 19, 20 and 21
orf19.6781	1.15264	0.067612		Putative transcription factor with zinc finger DNA-binding motif
orf19.7472	1.15247	0.0372392	IFF4	Putative GPI-anchored protein; homozygous null mutant germ tubes show decreased adhesion to plastic substrate; not essential for viability
orf19.3332	1.15236	0.0364113		Predicted ORF in Assemblies 19, 20 and 21
orf19.2621	1.1523	0.526769		Predicted ORF in Assemblies 19, 20 and 21
orf19.7173	1.15217	0.227916		Predicted ORF in Assemblies 19, 20 and 21
orf19.5669	1.15189	0.124735		Predicted ORF in Assemblies 19, 20 and 21
orf19.3942.1	1.15175	0.0785533	RPL43A	Downregulated in the presence of human whole blood or polymorphonuclear (PMN) cells; shows colony morphology-related gene regulation by Ssn6p
orf19.7579	1.15147	0.311318	FGR34	Protein lacking an ortholog in S. cerevisiae; transposon mutation affects filamentous growth
orf19.941	1.15144	0.271763	SEC14	Essential protein; functional homolog of S. cerevisiae Sec14p, which is a Golgi phosphatidylinositol/phosphatidylcholine transfer protein that regulates choline-phosphate cytidyltransferase and thereby affects secretion; biofilm-regulated
orf19.2722	1.15131	0.0886563	CGR1	Possible negative regulator of yeast-form growth; induced upon growth cessation at yeast-hyphal transition or during planktonic growth; physically interacts with Msi3p, an HSP70 family member; similar to rat anti-aging gene, SMP30
orf19.1178	1.15118	0.0893625		Putative transcription factor with bZIP DNA-binding motif
orf19.1900	1.15093	0.138757		Predicted ORF in Assemblies 19, 20 and 21
orf19.3928	1.15093	0.378726		Putative transcription factor with zinc finger DNA-binding motif
orf19.2848	1.15051	0.018616		Predicted ORF in Assemblies 19, 20 and 21
orf19.1421	1.15048	0.032378		Predicted ORF in Assemblies 19, 20 and 21
orf19.775	1.15044	0.25088		Predicted ORF in Assemblies 19, 20 and 21
orf19.1757	1.15043	0.4059		Putative transcription factor with zinc finger DNA-binding motif; transcription is upregulated in clinical isolates from HIV+ patients with oral candidiasis
orf19.3788.1	1.15012	0.101098	RPL30	Similar to S. cerevisiae L30 ribosomal subunit; pre-mRNA is alternatively spliced to productive and unproductive transcripts; splicing is temperature-regulated; colony morphology-related gene regulation by Ssn6p; regulated by Nrg1p, Tup1p
orf19.3231	1.14971	0.388442	CDC27	Predicted ORF in Assemblies 19, 20 and 21; periodic mRNA expression, peak at cell-cycle S/G2 phase
orf19.2196	1.14971	0.349809		Predicted ORF in Assemblies 19, 20 and 21
orf19.7512	1.14969	0.182785		Predicted ORF in Assemblies 19, 20 and 21
orf19.4361	1.14963	0.0210345	IFF3	Putative GPI-anchored protein of unknown function
orf19.2994	1.14963	0.520779	RPL13	Protein described as ribosomal subunit; antigenic during murine systemic infection; genes encoding cytoplasmic ribosomal subunits, translation factors, and tRNA synthetases are downregulated upon phagocytosis by murine macrophage
orf19.3319	1.14928	0.154391		Predicted ORF in Assemblies 19, 20 and 21
orf19.1022	1.14923	0.0542944		Predicted ORF from Assembly 19; removed from Assembly 20
orf19.6010	1.14906	0.119577	CDC5	Polo-like kinase; probably essential for viability; depletion causes defects in spindle elongation and causes Cdc35p-dependent filamentation; member of conserved Mcm1p regulon; virulence-group-correlated expression
orf19.1447	1.14889	0.066143		Predicted ORF in Assemblies 19, 20 and 21
orf19.2885	1.14888	0.405306	PRI2	Gene adjacent to CDC68; divergently transcribed with CDC68
orf19.2442	1.14874	0.33823		Decreased transcription is observed in an azole-resistant strain that overexpresses MDR1
orf19.996	1.14848	0.0538116		Predicted ORF in Assemblies 19, 20 and 21; possibly spurious ORF (Annotation Working Group prediction)
orf19.4626	1.14847	0.309564		Predicted ORF in Assemblies 19, 20 and 21
orf19.910	1.14822	0.32868		Predicted ORF in Assemblies 19, 20 and 21
orf19.1005	1.14815	0.686326		Predicted ORF in Assemblies 19, 20 and 21; transcription is upregulated in both intermediate and mature biofilms
orf19.2772	1.14811	0.101821	HOS3	Histone deacetylase; similar to S. cerevisiae Hos3p; greater expression and longer mRNA in white cells, compared to opaque cells; has conserved deacetylation motif
orf19.2257	1.14791	0.353059		Predicted ORF in Assemblies 19, 20 and 21
orf19.1524	1.14773	0.0391298	SPR3	Septin; mutant has no obvious phenotype
orf19.873.1	1.14762	0.155741	COX6	Flucytosine induced
orf19.4614	1.1475	0.411026		Predicted ORF in Assemblies 19, 20 and 21
orf19.2989	1.14726	0.031115		Predicted ORF in Assemblies 19, 20 and 21
orf19.6323	1.14709	0.730779		Predicted ORF in Assemblies 19, 20 and 21
orf19.7625	1.14704	0.653324	PGA1	Putative GPI-anchored protein of unknown function; induced during cell wall regeneration
orf19.6434	1.14666	0.402136		Predicted ORF in Assemblies 19, 20 and 21
orf19.6167	1.14661	0.274923	AYR1	Protein described as putative oxidoreductase; transcriptionally induced by interaction with macrophage
orf19.273	1.14641	0.182845		Predicted ORF in Assemblies 19, 20 and 21
orf19.6498	1.14605	0.0354441		Predicted ORF in Assemblies 19, 20 and 21
orf19.6670	1.14588	0.288873	CAC2	Predicted ORF in Assemblies 19, 20 and 21; macrophage-induced gene
orf19.7311	1.14586	0.364992		Predicted ORF in Assemblies 19, 20 and 21
orf19.5646	1.1458	0.0378248		Predicted ORF in Assemblies 19, 20 and 21
orf19.6919	1.14553	0.0417371		Predicted ORF in Assemblies 19, 20 and 21
orf19.1538	1.14537	0.0943684	TLG2	Predicted ORF in Assemblies 19, 20 and 21; macrophage/pseudohyphal-repressed
orf19.3899	1.14532	0.0622609	SDC1	Predicted ORF in Assemblies 19, 20 and 21
orf19.3462	1.14519	0.0947213	SAR1	Functional homolog of S. cerevisiae Sar1p, which is required for ER-to-Golgi protein transport; binds GTP; similar to small GTPase superfamily proteins; gene has intron
orf19.5664	1.14517	0.315851	HOF1	Protein not essential for viability; similar to S. cerevisiae Hof1p, which is a protein localized to the bud neck and required for cytokinesis; periodic mRNA expression, peak at cell-cycle G2/M phase
orf19.6636	1.14513	0.0586275		Predicted ORF in Assemblies 19, 20 and 21
orf19.1409	1.14478	0.161492	VAC7	Protein not essential for viability; similar to S. cerevisiae Fab1p, which is an enzyme regulator involved in phospholipid metabolism
orf19.6284	1.14476	0.0411609		Predicted ORF in Assemblies 19, 20 and 21
orf19.3813	1.14473	0.0372981		Predicted ORF in Assemblies 19, 20 and 21
orf19.4861	1.14458	0.0481646		Predicted ORF in Assemblies 19, 20 and 21
orf19.264	1.14451	0.309838		Predicted ORF in Assemblies 19, 20 and 21; possibly spurious ORF (Annotation Working Group prediction)
orf19.6299	1.14442	0.283521		Predicted ORF from Assembly 19; merged with orf19.4153 in Assembly 20
orf19.3589	1.14439	0.0346403	SPO11	DNA endonuclease required for genetic recombination between homologous chromosomes during the parasexual cycle; produced in mitotically dividing cells; similar to S. cerevisiae Spo11p, which functions in recombination during meiosis
orf19.1497	1.14408	0.639989		Putative transcription factor with zinc cluster DNA-binding motif
orf19.3200	1.14397	0.0343946	MTLA2	Master regulator (activator) of a-type mating; has HMG domain, which is predicted to bind DNA; gene has intron; not related to S. cerevisiae MATa2; a/alpha mating type may increase virulence, provides competitive advantage
orf19.2538	1.14373	0.057112	PTC2	Putative protein phosphatase of the Type 2C-related family (serine/threonine-specific), similar to S. cerevisiae Ptc2p and Ptc3p; mutant shows virulence defect
orf19.639.1	1.14372	0.193762		ORF Predicted by Annotation Working Group
orf19.3872	1.1434	0.749994		Predicted ORF in Assemblies 19, 20 and 21
orf19.2160	1.14339	0.500892	NAG4	Putative transporter; fungal-specific; similar to Nag3p and to S. cerevisiae Ypr156Cp and Ygr138Cp; required for wild-type mouse virulence and wild-type cycloheximide resistance; gene cluster encodes enzymes of GlcNAc catabolism
orf19.2771	1.14291	0.0865606	BEM3	Putative GTPase-activating protein (GAP) for Rho-type GTPase Cdc42p; involved in cell signaling pathways that control cell polarity; similar to S. cerevisiae Bem3p
orf19.4530.1	1.14281	0.332692		ORF Predicted by Annotation Working Group; regulated by Nrg1p, Tup1p
orf19.6472	1.14278	0.520605	CYP1	Peptidyl-propyl cis-trans isomerase (PPIase); activity is cyclosporin A sensitive; soluble protein in hyphae; biofilm induced, macrophage-induced protein; downregulated upon treatment of biofilm with farnesol
orf19.5558	1.14274	0.452033	RBF1	Transcription factor; glutamine-rich activation domain; binds RPG-box DNA sequences; predominantly nuclear; antigenic during human oral infection; mutation causes accelerated induction of filamentous growth
orf19.1782	1.14247	0.00602468		Predicted ORF in Assemblies 19, 20 and 21
orf19.801	1.14153	0.283844	TBF1	Essential transcriptional activator that binds to a conserved sequence at ribosomal protein genes and the rDNA locus; acts with Cbf1p at a subset of promoters; biological role is analogous to that of S. cerevisiae Rap1p, not to S.c. Tbf1p
orf19.7181	1.14138	0.0921173		Predicted ORF in Assemblies 19, 20 and 21
orf19.5031	1.1412	0.218846	SSK1	Response regulator of two-component system; role in oxidative stress response, cell wall biosynthesis, virulence, hyphal growth on solid media; expressed in hyphae and yeast-form cells; putative peroxisomal targeting sequence (PTS1)
orf19.791	1.14114	0.0432252	RIM11	Protein not essential for viability; similar to S. cerevisiae Rim11p, which is a protein kinase involved in meiosis and sporulation
orf19.7634	1.14114	0.365248	MCD1	Protein similar to S. cerevisiae Mcd1p; transcription is repressed in response to alpha pheromone in SpiderM medium; cell-cycle regulated periodic mRNA expression
orf19.2119	1.141	0.378035	NDT80	Activator of CDR1 induction by antifungal drugs; required for wild-type drug resistance; transcriptionally induced upon antifungal drug treatment; similar to S. cerevisiae Ndt80p, which is a meiosis-specific transcriptional regulator
orf19.5934	1.14075	0.277806		Predicted ORF in Assemblies 19, 20 and 21
orf19.3211	1.14038	0.0634423	RCF3	Transcription is induced upon filamentous growth
orf19.3487	1.14003	0.0194959		Predicted ORF in Assemblies 19, 20 and 21
orf19.4781	1.13989	0.36521	GRP1	Protein similar to dihydroflavonol-4-reductases
orf19.5959	1.13984	0.1066	NOP14	Predicted ORF in Assemblies 19, 20 and 21; mutation confers resistance to 5-fluorocytosine (5-FC), 5-fluorouracil (5-FU), and tubercidin (7-deazaadenosine); heterozygous null mutant exhibits resistance to parnafungin
orf19.4410	1.1397	0.0322567	ALG1	Protein likely to be essential for growth, based on an insertional mutagenesis strategy; similar to S. cerevisiae Alg1p, which is a mannosyltransferase involved in N-linked protein glycosylation
orf19.7139	1.1396	0.288471		Predicted ORF in Assemblies 19, 20 and 21
orf19.6985	1.13923	0.422766	TEA1	Putative transcription factor with zinc cluster DNA-binding motif; has similarity to S. cerevisiae Tea1p
orf19.7516	1.1391	0.0975474		Predicted ORF in Assemblies 19, 20 and 21
orf19.2850	1.13887	0.621568		Predicted ORF in Assemblies 19, 20 and 21; induced by nitric oxide in yhb1 mutant
orf19.5919	1.1387	0.392072	MEA1	Protein similar to A. nidulans MesA, which is involved in localization of actin cables
orf19.7198	1.13863	0.400148		Predicted ORF in Assemblies 19, 20 and 21
orf19.4508	1.13862	0.0957306		Predicted ORF in Assemblies 19, 20 and 21
orf19.6260	1.13836	0.121805		Predicted ORF in Assemblies 19, 20 and 21
orf19.232	1.13835	0.0789711		Predicted ORF in Assemblies 19, 20 and 21
orf19.2313	1.13814	0.0204328		Predicted ORF in Assemblies 19, 20 and 21
orf19.3447	1.13807	0.465606		Predicted ORF in Assemblies 19, 20 and 21
orf19.1114	1.13804	0.332647		Predicted ORF in Assemblies 19, 20 and 21
orf19.2661	1.13791	0.0406652	TLO34	Non-telomeric member of a family of telomere-proximal genes of unknown function; predicted N-terminus is extended, relative to that of other family members
orf19.6590	1.13778	0.333977		Predicted ORF in Assemblies 19, 20 and 21
orf19.5537	1.13774	0.0476849		Predicted ORF in Assemblies 19, 20 and 21
orf19.6017	1.13704	0.393327		Predicted ORF in Assemblies 19, 20 and 21
orf19.4324	1.13677	0.23256		Predicted ORF in Assemblies 19, 20 and 21
orf19.6574	1.13669	0.0258477	ALK6	Protein described as cytochrome P-450 of N-alkane-induced detoxification; macrophage-induced gene
orf19.1841	1.13663	0.294812		Predicted ORF in Assemblies 19, 20 and 21
orf19.1622	1.13646	0.183726	YCG1	Predicted ORF in Assemblies 19, 20 and 21
orf19.2097	1.1364	0.0451047		Predicted ORF in Assemblies 19, 20 and 21
orf19.1616	1.13634	0.0993596	FGR23	Protein lacking an ortholog in S. cerevisiae; transposon mutation affects filamentous growth; transcriptionally repressed by A1p and Alpha2p in white-phase cells, a-specific and induced by alpha factor
orf19.2882	1.13613	0.0394755	XUT1	Putative high-affinity, high-capacity xanthine-uric acid/H+ symporter; similar to A. nidulans UapA; member of the Nucleobase-Ascorbate Transporter/Nucleobase-Cation Symporter (NAT/NCS2) family
orf19.5379	1.13606	0.180731	ERG4	Protein described as similar to sterol C-24 reductase; shows Mob2p-dependent hyphal regulation; fluconazole-induced; caspofungin repressed
orf19.6630	1.13589	0.359446		ORF Predicted by Annotation Working Group
orf19.6790	1.13581	0.0243497		Predicted ORF in Assemblies 19, 20 and 21
orf19.4118	1.13549	0.42078	CNT	Cation-coupled nucleoside transporter (H(+)/nucleoside symporter); CNT family; transports adenosine, uridine, inosine, guanosine, tubercidin; variant alleles encode high- and low-affinity isoforms; S or G at residue 328 affects specificity
orf19.139	1.13518	0.0426275	TRA1	Subunit of the NuA4 histone acetyltransferase complex
orf19.3973	1.13477	0.399921		Predicted ORF in Assemblies 19, 20 and 21
orf19.3180	1.1346	0.529798		Predicted ORF in Assemblies 19, 20 and 21
orf19.4950	1.13433	0.573505	AKR1	Ankyrin-repeat protein; increased transcription is observed upon fluphenazine treatment
orf19.7619	1.13417	0.0175571		Predicted ORF in Assemblies 19, 20 and 21
orf19.3306	1.13386	0.395591		Predicted ORF in Assemblies 19, 20 and 21
orf19.4208	1.13374	0.0151854	RAD52	Required for homologous DNA recombination, repair of UV- or MMS-damaged DNA, telomere length, UV-induced LOH; constitutive expression, MMS-induced; weakly complements S. cerevisiae rad52 mutant; slow growth, increased white-to-opaque switch
orf19.2041	1.13303	0.036695		Predicted ORF in Assemblies 19, 20 and 21
orf19.5259	1.13301	0.15587		Predicted ORF in Assemblies 19, 20 and 21
orf19.712	1.1329	0.273035	KIP1	Non-essential kinesin from the bipolar (Kinesis-5) family; involved in formation of the mitotic spindle
orf19.6134	1.13285	0.0596381		Predicted ORF in Assemblies 19, 20 and 21
orf19.6973	1.13276	0.0136963		Predicted ORF in Assemblies 19, 20 and 21; regulated by Gcn2p and Gcn4p
orf19.1764	1.13272	0.280139		Predicted ORF in Assemblies 19, 20 and 21
orf19.7184	1.13231	0.320619		Predicted ORF in Assemblies 19, 20 and 21
orf19.183	1.13217	0.190464	HIS3	Imidazoleglycerol-phosphate dehydratase, enzyme of histidine biosynthesis; functionally complements S. cerevisiae his3-1 mutation; hyphal-induced expression; regulated by Gcn2p and Gcn4p; fungal-specific (no human or murine homolog)
orf19.5596	1.13202	0.559369		Predicted ORF in Assemblies 19, 20 and 21
orf19.2630	1.13199	0.279048	RAD59	Protein similar to S. cerevisiae Rad59p; N-terminal similarity with Rad52p
orf19.6416	1.13197	0.0283474		Predicted ORF in Assemblies 19, 20 and 21
orf19.2978	1.13191	0.00412692		Predicted ORF in Assemblies 19, 20 and 21; possibly spurious ORF (Annotation Working Group prediction)
orf19.6268	1.13175	0.313416		Predicted ORF in Assemblies 19, 20 and 21; decreased expression observed in an ssr1 homozygous null mutant
orf19.6348	1.13173	0.388495		Protein not essential for viability
orf19.5429	1.13164	0.613143		Predicted ORF in Assemblies 19, 20 and 21
orf19.4799	1.13162	0.0414115		Predicted ORF in Assemblies 19, 20 and 21
orf19.351	1.13159	0.229226		Predicted ORF in Assemblies 19, 20 and 21
orf19.3467	1.13123	0.561653		Predicted ORF in Assemblies 19, 20 and 21
orf19.656	1.13103	0.0101409	DPP1	Putative diacylglycerol pyrophosphate phosphatase of diacylglycerol production for phospholipid biosynthesis; downregulation correlates with clinical development of fluconazole resistance
orf19.5041	1.13097	0.28622		Predicted ORF in Assemblies 19, 20 and 21
orf19.7324	1.13075	0.0938295	THI13	Protein not essential for viability; similar to S. cerevisiae Thi13p, which is involved in synthesis of the thiamine precursor hydroxymethylpyrimidine; induced by nitric oxide in yhb1 mutant
orf19.4368	1.13069	0.0338479		Predicted ORF in Assemblies 19, 20 and 21
orf19.2926	1.13054	0.253673		Predicted ORF in Assemblies 19, 20 and 21
orf19.6685	1.13048	0.449848	ISY1	Predicted ORF in Assemblies 19, 20 and 21; mutation confers resistance to 5-fluorocytosine (5-FC)
orf19.7391	1.13048	0.0811136	OCH1	alpha-1,6-mannosyltransferase; initiates N-glycan outer chain branch addition; similar to S. cerevisiae Och1p; required for wild-type virulence in mouse intravenous infection; fungal-specific (no human or murine homolog)
orf19.2166	1.12996	0.0172811		Predicted ORF in Assemblies 19, 20 and 21
orf19.3840	1.12994	0.0195129		Predicted ORF in Assemblies 19, 20 and 21
orf19.3232	1.1298	0.121746		Putative transporter; mutation confers hypersensitivity to toxic ergosterol analog; fungal-specific (no human or murine homolog)
orf19.5725	1.1295	0.203278		Predicted ORF in Assemblies 19, 20 and 21
orf19.3207	1.12924	0.239629	CCN1	G1 cyclin; required for hyphal growth maintenance (not initiation); cell-cycle regulated transcription (G1/S); Cdc28p-Ccn1p initiates Cdc11p S394 phosphorylation on hyphal induction; expression in S. cerevisiae inhibits pheromone response
orf19.5045	1.12915	0.102721		Predicted ORF in Assemblies 19, 20 and 21; transcriptionally activated by Mnl1p under weak acid stress
orf19.5144	1.12895	0.422853	PGA28	Protein similar to S. cerevisiae Wsc2p, which has roles in stress- and cell-wall-related processes; predicted Kex2p substrate; putative GPI-anchored protein
orf19.6993	1.12866	0.0238217	GAP2	Protein similar to amino acid permeases; ketoconazole, flucytosine repressed; induced by histidine, and induction requires Ssy1p; regulated by Nrg1p, Tup1p; shows colony morphology-related gene regulation by Ssn6p
orf19.5503	1.12855	0.233988		Putative protein of unknown function, transcription is upregulated in clinical isolates from HIV+ patients with oral candidiasis; predicted ORF in Assemblies 19, 20 and 21
orf19.6798	1.12836	0.578452	SSN6	Functional homolog of S. cerevisiae Cyc8p/Ssn6p; Ssn6p and Tup1p regulate distinct sets of genes; hyphal growth regulator; overexpression or mutation causes avirulence in mouse IV infection; TPR motifs; repressed during hyphal growth
orf19.7344	1.12829	0.0226209		Predicted ORF in Assemblies 19, 20 and 21
orf19.3935	1.12825	0.10031		Predicted ORF in Assemblies 19, 20 and 21
orf19.3347	1.12822	0.150124	RPB7	Functional homolog of S. cerevisiae Rpb7p, an essential subunit of RNA Polymerase II; enhances hyperfilamentation of an S. cerevisiae rpb4 mutant; suppresses defects of S. cerevisiae rpb4 and ess1 mutants
orf19.5218	1.12805	0.487445		Predicted ORF from Assembly 19; merged with orf19.4122 in Assembly 20
orf19.7421	1.12793	0.0357752	CYP5	Protein described as a peptidyl-prolyl cis-trans isomerase; macrophage-downregulated protein level; protein level decreased in stationary phase cultures
orf19.4473	1.12791	0.00903636		Predicted ORF in Assemblies 19, 20 and 21
orf19.7371	1.1279	0.0435849		Predicted zinc-cluster protein of unknown function
orf19.2871	1.12771	0.223194	SDH12	Protein with similarity to S. cerevisiae SDH1, which is a flavoprotein subunit of succinate dehydrogenase; soluble protein in hyphae; macrophage-downregulated protein level; downregulated by Efg1p; repressed by nitric oxide
orf19.5213.2	1.1277	0.0927514	COX9	Putative subunit VIIa of cytochrome c oxidase; flucytosine induced
orf19.5395	1.12754	0.0994674		Predicted ORF in Assemblies 19, 20 and 21
orf19.6176	1.12753	0.178726	SEC61	Essential protein; expected to act in protein translocation from the endoplasmic reticulum: similar to S. cerevisiae Sec61p; chimeric mutant partially functionally complements S. cerevisiae sec61 defects; 10 transmembrane regions predicted
orf19.6391	1.1274	0.0831453		Increased transcription is observed in an azole-resistant strain that overexpresses MDR1
orf19.7672	1.12715	0.446034		Predicted ORF in Assemblies 19, 20 and 21
orf19.7518	1.12701	0.101516		Putative transcription factor with zinc cluster DNA-binding motif
orf19.947	1.12695	0.37742	MRP17	Predicted mitochondrial ribosomal protein
orf19.6982	1.12693	0.0992179		Predicted ORF in Assemblies 19, 20 and 21
orf19.5501	1.12676	0.189605	YAF9	Subunit of the NuA4 histone acetyltransferase complex; transcription is regulated by Mig1p
orf19.3843	1.12671	0.312337		Predicted ORF in Assemblies 19, 20 and 21
orf19.4725	1.12657	0.418369	SWI6	Predicted ORF in Assemblies 19, 20 and 21; periodic mRNA expression, peak at cell-cycle G1/S phase
orf19.6379	1.12644	0.376235		Predicted ORF in Assemblies 19, 20 and 21
orf19.866	1.12624	0.42662	RAD32	Protein similar to S. cerevisiae protein with role in nucleotide excision repair; down-regulation associated with azole resistance
orf19.1338	1.12612	0.118327		Predicted ORF in Assemblies 19, 20 and 21
orf19.2868	1.1261	0.323303		Predicted ORF in Assemblies 19, 20 and 21; transcription is induced in response to alpha pheromone in SpiderM medium
orf19.3356	1.12606	0.0415701	ESP1	Predicted ORF in Assemblies 19, 20 and 21; mutation confers increased sensitivity to nocodazole; periodic mRNA expression, peak at cell-cycle S/G2 phase
orf19.1670	1.12605	0.013857	BRO1	Protein involved in transport from multivesicular body to vacuole; similar to S. cerevisiae Bro1p, which is a class E vacuolar protein sorting (VPS) factor; not involved in RIM101 pathway; macrophage/pseudohyphal-repressed
orf19.7501	1.12594	0.333783		Predicted ORF in Assemblies 19, 20 and 21; protein detected by mass spec in exponential and stationary phase cultures
orf19.6313	1.1258	0.288316	MNT4	Transcriptionally regulated by iron; expression greater in low iron; similar to mannosyltransferases
orf19.3298	1.12555	0.421445	CCH1	Putative voltage-gated Ca2+ channel of the high affinity calcium uptake system; roles in thigmotropism, establishment of galvanotropism; transcription is regulated by Nrg1p and Mig1p
orf19.2819	1.12548	0.0963593		Predicted ORF in Assemblies 19, 20 and 21; possibly spurious ORF (Annotation Working Group prediction)
orf19.4882	1.12535	0.0439709		Predicted ORF in Assemblies 19, 20 and 21
orf19.6179	1.12523	0.414446		ORF Predicted by Annotation Working Group
orf19.93	1.1252	0.301327		Predicted ORF in Assemblies 19, 20 and 21; shows colony morphology-related gene regulation by Ssn6p
orf19.7644	1.12513	0.175744		Predicted ORF in Assemblies 19, 20 and 21
orf19.3163	1.12512	0.487952		Predicted ORF in Assemblies 19, 20 and 21
orf19.6030	1.12508	0.451189		Predicted ORF in Assemblies 19, 20 and 21
orf19.6873.1	1.1249	0.506456		ORF Predicted by Annotation Working Group
orf19.2222.1	1.12488	0.185941		ORF Predicted by Annotation Working Group; merged with orf19.2660 in Assembly 20
orf19.6357	1.12486	0.0791108		Predicted ORF in Assemblies 19, 20 and 21
orf19.4145	1.12483	0.0508696	ZCF20	Predicted zinc-finger protein of unknown function
orf19.6995	1.12469	0.288326		Predicted ORF in Assemblies 19, 20 and 21
orf19.862	1.12458	0.378949		Predicted ORF in Assemblies 19, 20 and 21
orf19.5880	1.12453	0.540218		Predicted ORF in Assemblies 19, 20 and 21
orf19.6778	1.12446	0.00936152		Predicted ORF in Assemblies 19, 20 and 21
orf19.6209	1.12426	0.0277279		Predicted membrane transporter, member of the monocarboxylate porter (MCP) family, major facilitator superfamily (MFS)
orf19.1878	1.12425	0.366313		Predicted ORF in Assemblies 19, 20 and 21
orf19.5717	1.12421	0.31459		Predicted ORF in Assemblies 19, 20 and 21
orf19.3611	1.12414	0.125312		Predicted ORF in Assemblies 19, 20 and 21; repressed by nitric oxide
orf19.4172	1.12407	0.284593		Predicted ORF in Assemblies 19, 20 and 21
orf19.2229	1.12406	0.0620502		Predicted ORF in Assemblies 19, 20 and 21
orf19.2774	1.12403	0.110729	LAB5	Predicted ORF in Assemblies 19, 20 and 21
orf19.7034	1.12386	0.376506		Predicted ORF in Assemblies 19, 20 and 21
orf19.5089	1.12374	0.0617851	TERT	Telomerase reverse transcriptase; catalytic protein subunit of telomere synthesis; essential for telomerase activity; has telomerase-specific motif T and other conserved reverse transcriptase motifs
orf19.3577.1	1.12372	0.458081		ORF Predicted by Annotation Working Group
orf19.660	1.12367	0.0542389		Predicted ORF in Assemblies 19, 20 and 21; possibly spurious ORF (Annotation Working Group prediction)
orf19.2397.3	1.12351	0.372476		ORF Predicted by Annotation Working Group
orf19.6940	1.12335	0.0265938		ORF Predicted by Annotation Working Group; possibly spurious ORF (Annotation Working Group prediction)
orf19.6286.2	1.12332	0.236294	RPS27	Putative ribosomal protein; genes encoding cytoplasmic ribosomal subunits, translation factors, and tRNA synthetases are downregulated upon phagocytosis by murine macrophage
orf19.5853	1.12331	0.269664		Predicted ORF from Assembly 19; merged with orf19.3519 in Assembly 20
orf19.5077	1.1233	0.0854613		Predicted ORF in Assemblies 19, 20 and 21; repressed by nitric oxide; possibly spurious ORF (Annotation Working Group prediction)
orf19.4625	1.12319	0.0535096	TOA2	Protein abundance is decreased in the CAI-4 strain background compared to the SC5314 strain background, and abundance is not affected by reintegration of URA3 in CAI-4; flucytosine induced
orf19.5520	1.12293	0.059803	ASG7	Predicted ORF in Assemblies 19, 20 and 21; specific to a-cells; transcription is induced in response to alpha pheromone in SpiderM medium; member of conserved Mcm1p regulon
orf19.2237	1.12289	0.347422	SPR1	Putative GPI-anchored protein; not essential for viability; similar to S. cerevisiae Spr1p, which is a sporulation-specific exo-1,3-beta-glucanase
orf19.5163	1.12259	0.0481954	SFI1	Predicted ORF in Assemblies 19, 20 and 21; essential for growth
orf19.527	1.12245	0.230324		Predicted ORF in Assemblies 19, 20 and 21; possibly spurious ORF (Annotation Working Group prediction)
orf19.1547	1.12243	0.296333		Predicted ORF in Assemblies 19, 20 and 21
orf19.3844	1.12242	0.397918	MRP8	Protein not essential for viability; similar to S. cerevisiae Mrp8p, which is a mitochondrial ribosomal protein; greater transcription in hyphal form than yeast form
orf19.2697	1.12237	0.357888		Predicted ORF in Assemblies 19, 20 and 21
orf19.5316	1.1221	0.0309658	FGR29	Protein lacking an ortholog in S. cerevisiae; transposon mutation affects filamentous growth
orf19.1668	1.12197	0.340279		Predicted ORF in Assemblies 19, 20 and 21; decreased expression observed in an ssr1 homozygous null mutant; possibly spurious ORF (Annotation Working Group prediction)
orf19.6898.1	1.12194	0.235163		ORF Predicted by Annotation Working Group
orf19.3254	1.12185	0.124041		Protein not essential for viability; possibly spurious ORF (Annotation Working Group prediction)
orf19.4280	1.12184	0.37617		Predicted ORF in Assemblies 19, 20 and 21; possibly spurious ORF (Annotation Working Group prediction)
orf19.364	1.12177	0.396324		Predicted ORF in Assemblies 19, 20 and 21
orf19.6264.3	1.12175	0.416167		ORF Predicted by Annotation Working Group
orf19.2311	1.12164	0.525645	RPL82	Predicted ribosomal protein; genes encoding cytoplasmic ribosomal subunits, translation factors, and tRNA synthetases are downregulated upon phagocytosis by murine macrophage
orf19.2653	1.12147	0.0294097		Protein not essential for viability
orf19.7065	1.12145	0.0655108	PSF3	Predicted ORF in Assemblies 19, 20 and 21; cell-cycle regulated periodic mRNA expression
orf19.7048.1	1.12126	0.521344	RPS28B	Putative ribosomal protein S28B; ORF Predicted by Annotation Working Group
orf19.3826	1.12115	0.674235		Predicted ORF in Assemblies 19, 20 and 21; Plc1p-regulated
orf19.244	1.12107	0.230693	DCG1	Transcription is regulated by Nrg1p and Mig1p
orf19.4187	1.12078	0.032418		Predicted ORF in Assemblies 19, 20 and 21
orf19.4234	1.12077	0.0848124		Predicted ORF in Assemblies 19, 20 and 21
orf19.5578	1.1206	0.0131571		Predicted ORF in Assemblies 19, 20 and 21
orf19.1096	1.12056	0.45126		Predicted ORF in Assemblies 19, 20 and 21
orf19.3310	1.12017	0.522194		Predicted ORF in Assemblies 19, 20 and 21; possibly spurious ORF (Annotation Working Group prediction)
orf19.1690	1.12012	0.45701	TOS1	Protein described as similar to alpha agglutinin anchor subunit; exogenously expressed protein is a substrate for Kex2p processing in vitro; fluconazole-induced; transcription is induced in response to alpha pheromone in SpiderM medium
orf19.6948	1.12012	0.70298	CCC1	Protein described as predicted manganese transporter; alkaline downregulated; shows colony morphology-related gene regulation by Ssn6p; repressed by nitric oxide
orf19.4898	1.12009	0.0465789		Predicted ORF in Assemblies 19, 20 and 21; increased expression in response to prostaglandins
orf19.2770	1.12005	0.12126		Predicted ORF in Assemblies 19, 20 and 21
orf19.6992	1.11984	0.240349		Predicted membrane transporter, member of the drug:proton antiporter (12 spanner) (DHA1) family, major facilitator superfamily (MFS)
orf19.5019	1.11978	0.153202		Predicted ORF in Assemblies 19, 20 and 21
orf19.2291	1.11948	0.0105855		Predicted ORF from Assembly 19; possibly spurious ORF (Annotation Working Group prediction); merged with orf19.3719 in Assembly 20
orf19.5826	1.11946	0.446759		Predicted ORF in Assemblies 19, 20 and 21
orf19.5621	1.1194	0.341895		Predicted ORF in Assemblies 19, 20 and 21; mutation confers hypersensitivity to amphotericin B
orf19.1510	1.11931	0.0541031		Protein not essential for viability
orf19.7660	1.1193	0.218953		Predicted ORF in Assemblies 19, 20 and 21
orf19.1594	1.11887	0.354628		Predicted ORF from Assembly 19; possibly spurious ORF (Annotation Working Group prediction); merged with orf19.792 in Assembly 20
orf19.3252	1.11868	0.687734		Predicted zinc-finger protein of unknown function; has similarity to S. cerevisiae Dal81p, which is a transcription factor involved in the regulation of nitrogen-degradation genes
orf19.3049	1.11864	0.145861		Predicted ORF in Assemblies 19, 20 and 21
orf19.2792	1.11858	0.0502921	IST2	Predicted ORF in Assemblies 19, 20 and 21
orf19.2558	1.11856	0.380123		Predicted ORF in Assemblies 19, 20 and 21
orf19.478	1.11853	0.0929316		Predicted ORF in Assemblies 19, 20 and 21
orf19.7482	1.11849	0.0973314		Predicted ORF in Assemblies 19, 20 and 21
orf19.4497	1.11843	0.159625	MED8	Protein not essential for viability; similar to S. cerevisiae Med8p, which is a subunit of the RNA polymerase II mediator complex
orf19.1288	1.11841	0.377182	FOX2	Predicted 3-hydroxyacyl-CoA epimerase, required for fatty acid beta-oxidation; upregulated upon phagocytosis; transcription is regulated by Mig1p and by white-opaque switching; transcriptional activation by oleate requires Ctf1p
orf19.7327	1.11829	0.218241	PHO88	Putative role in phosphate transport; biofilm-regulated expression; amphotericin B repressed
orf19.5585	1.11792	0.000306296	SAP5	Secreted aspartyl proteinase; sap4 sap5 sap6 triple mutant has defects in virulence and utilization of protein as nitrogen source; expressed in mucosal & systemic infections, oral carriage; absent from less virulent species, C. dubliniensis
orf19.1011	1.11791	0.184168		Predicted ORF in Assemblies 19, 20 and 21
orf19.6645	1.11786	0.503515	HMO1	High mobility group-like protein; activates pseudohyphal growth when expressed in S. cerevisiae; decreased expression in hyphae compared to yeast-form cells; amphotericin B repressed
orf19.4568	1.1175	0.481988	ZCF25	Putative transcription factor with zinc cluster DNA-binding motif
orf19.6309	1.11725	0.457452	MSS11	Transcriptional activator, binds to Flo8p via a LisH motif to cooperatively activate transcription of hyphal-specific genes; required for hyphal growth
orf19.6022	1.11718	0.281858		Predicted ORF in Assemblies 19, 20 and 21; downregulated during core stress response
orf19.5966	1.11703	0.157384		Predicted ORF in Assemblies 19, 20 and 21
orf19.1277	1.11696	0.367017		Predicted ORF in Assemblies 19, 20 and 21; repressed by Rgt1p
orf19.3572.3	1.11682	0.540595		ORF Predicted by Annotation Working Group
orf19.4043	1.11681	0.136579		Predicted ORF in Assemblies 19, 20 and 21; transcription is induced in response to alpha pheromone in SpiderM medium
orf19.6534.2	1.11677	0.352696		Predicted ORF in Assemblies 19, 20 and 21
orf19.3290	1.11673	0.393457		Predicted ORF in Assemblies 19, 20 and 21; repressed by nitric oxide
orf19.2982	1.11648	0.355845		Predicted ORF in Assemblies 19, 20 and 21
orf19.7606	1.11641	0.0840748		Predicted ORF in Assemblies 19, 20 and 21; possibly spurious ORF (Annotation Working Group prediction)
orf19.834	1.11641	0.329018		Predicted ORF in Assemblies 19, 20 and 21
orf19.6414	1.11636	0.202818		Predicted ORF in Assemblies 19, 20 and 21; possibly spurious ORF (Annotation Working Group prediction)
orf19.7201	1.11622	0.205622	SLA2	Actin binding protein, ortholog of S. cerevisiae Sla2p; required for alkaline pH-induced hyphal formation
orf19.6584	1.1162	0.484978	PRT1	Putative translation initiation factor; mutation confers hypersensitivity to roridin A and verrucarin A; genes encoding ribosomal subunits, translation factors, and tRNA synthetases are downregulated upon phagocytosis by murine macrophage
orf19.5586	1.11611	0.0238332		Predicted ORF in Assemblies 19, 20 and 21
orf19.211	1.11609	0.307849		Predicted ORF in Assemblies 19, 20 and 21
orf19.7300	1.11605	0.347984		Predicted ORF in Assemblies 19, 20 and 21
orf19.3607	1.11595	0.396323		Predicted ORF in Assemblies 19, 20 and 21
orf19.145	1.11595	0.0579735	RPB4	Protein similar to S. cerevisiae Rpb4p, which is a component of RNA polymerase II; transposon mutation affects filamentous growth
orf19.4551	1.11564	0.0457651	CTN1	Predicted carnitine acetyl transferase; required for growth on nonfermentable carbon sources but not for hyphal growth or virulence in mouse systemic model; transcription induced in macrophage; macrophage/pseudohyphal-repressed after 16 hr
orf19.326	1.11561	0.319989		Predicted ORF in Assemblies 19, 20 and 21
orf19.5848	1.11547	0.0301056		Predicted ORF in Assemblies 19, 20 and 21; possibly spurious ORF (Annotation Working Group prediction)
orf19.2564	1.11546	0.0555356		Predicted ORF in Assemblies 19, 20 and 21
orf19.191	1.11507	0.121179	KIC1	Member of the GCK-III subfamily of eukaryotic Ste20p kinases; in RAM cell wall integrity signaling network; role in cell separation, azole sensitivity; required for hyphal growth; constitutive expression is MTL, white-opaque independent
orf19.1991	1.11506	0.0482276		Predicted ORF in Assemblies 19, 20 and 21
orf19.746	1.11484	0.27625		Predicted ORF in Assemblies 19, 20 and 21
orf19.1397	1.11479	0.0938529		Predicted ORF in Assemblies 19, 20 and 21
orf19.5831	1.11447	0.0402757		Predicted ORF in Assemblies 19, 20 and 21
orf19.1769	1.11434	0.0191913		Predicted ORF in Assemblies 19, 20 and 21
orf19.7456	1.1143	0.67085		Predicted ORF in Assemblies 19, 20 and 21
orf19.2892	1.11427	0.0277678		Predicted ORF in Assemblies 19, 20 and 21
orf19.6037	1.11424	0.375886	ASM3	Putative secreted acid sphingomyelin phosphodiesterase; induced upon biofilm formation; possible Kex2p substrate; increased transcription is observed in an azole-resistant strain that overexpresses MDR1
orf19.2624	1.11417	0.513414		Predicted ORF in Assemblies 19, 20 and 21; decreased transcription is observed upon fluphenazine treatment or in an azole-resistant strain that overexpresses CDR1 and CDR2
orf19.6217	1.11412	0.293157	PGA63	Putative protein of unknown function
orf19.613	1.11381	0.259204		Predicted ORF from Assembly 19; removed from Assembly 20
orf19.1298	1.11378	0.0753513		Predicted ORF in Assemblies 19, 20 and 21
orf19.1725	1.11364	0.542813		Predicted ORF in Assemblies 19, 20 and 21
orf19.2009	1.11333	0.0899345		Predicted ORF in Assemblies 19, 20 and 21
orf19.6528	1.11298	0.0361615		Predicted ORF in Assemblies 19, 20 and 21
orf19.1502	1.11295	0.519249		Predicted ORF in Assemblies 19, 20 and 21
orf19.4525	1.11287	0.149275		Predicted ORF in Assemblies 19, 20 and 21
orf19.4432	1.11286	0.604986	KSP1	Predicted ORF in Assemblies 19, 20 and 21; mutation confers hypersensitivity to amphotericin B
orf19.7106	1.11263	0.0899484		Predicted ORF in Assemblies 19, 20 and 21
orf19.5047	1.11259	0.421424		Predicted ORF from Assembly 19; possibly spurious ORF (Annotation Working Group prediction); merged with orf19.4713 in Assembly 20
orf19.1276	1.11259	0.390058		Predicted ORF in Assemblies 19, 20 and 21; not essential for viability; similar to S. cerevisiae Vhs3p, which is a putative phosphopantothenoylcysteine decarboxylase
orf19.6561	1.1125	0.00322831	LAT1	Protein described as dihydrolipoamide acetyltransferase component (E2) of pyruvate dehydrogenase complex
orf19.2267	1.11225	0.118905	RFA2	Protein described as DNA replication factor A; RNA abundance regulated by cell cycle, tyrosol and cell density
orf19.7269	1.11212	0.103556		Predicted ORF in Assemblies 19, 20 and 21
orf19.398	1.11208	0.27415		Predicted ORF in Assemblies 19, 20 and 21; possibly spurious ORF (Annotation Working Group prediction)
orf19.2762	1.11204	0.513576	AHP1	Putative alkyl hydroperoxide reductase; immunogenic in mouse; biofilm-induced; fluconazole-induced; amphotericin B, caspofungin, alkaline downregulated; induced in core stress response; regulated by Ssk1p, Nrg1p, Tup1p, Ssn6p, Hog1p
orf19.6248	1.11182	0.127037		Predicted ORF in Assemblies 19, 20 and 21
orf19.4203	1.11174	0.142802		Predicted ORF in Assemblies 19, 20 and 21
orf19.156	1.11174	0.112952	FGR51	Protein lacking an ortholog in S. cerevisiae; transposon mutation affects filamentous growth
orf19.2428.2	1.11159	0.173337		ORF Predicted by Annotation Working Group; removed from Assembly 20
orf19.1017	1.11152	0.0280533		Predicted ORF from Assembly 19; removed from Assembly 20
orf19.321	1.11147	0.149545		Predicted ORF in Assemblies 19, 20 and 21
orf19.620	1.11144	0.043774		Predicted ORF from Assembly 19; removed from Assembly 20
orf19.305	1.11141	0.161443		Predicted ORF in Assemblies 19, 20 and 21; greater mRNA abundance observed in a cyr1 homozygous null mutant than in wild type
orf19.3617	1.11135	0.0443735		Putative protein of unknown function, transcription is upregulated in clinical isolates from HIV+ patients with oral candidiasis;; predicted ORF in Assemblies 19, 20 and 21 (see Locus History Note for Assembly 19 correction)
orf19.5098	1.11133	0.0371514	NTG1	Protein with strong similarity to both S. cerevisiae Ntg1p and Ntg2p DNA repair glycosylases; transcriptionally regulated by iron; expression greater in high iron
orf19.2986	1.11125	0.449972		Predicted ORF in Assemblies 19, 20 and 21
orf19.741	1.11121	0.427125		Predicted ORF in Assemblies 19, 20 and 21
orf19.1590	1.1111	0.498667		Predicted ORF in Assemblies 19, 20 and 21
orf19.4377	1.11089	0.060155	KRE1	Predicted GPI-anchor, role in 1,6-beta-D-glucan biosynthesis; production in S. cerevisiae increases glucan content and complements killer toxin sensitivity of kre1 mutant; possible N-linked glycosylation at Asn109; caspofungin induced
orf19.676	1.11079	0.562234		Predicted ORF in Assemblies 19, 20 and 21
orf19.2473	1.11064	0.412915		Decreased transcription is observed upon fluphenazine treatment or in an azole-resistant strain that overexpresses CDR1 and CDR2
orf19.5930	1.11062	0.288413		Predicted ORF in Assemblies 19, 20 and 21
orf19.1028	1.1104	0.404316		Predicted ORF in Assemblies 19, 20 and 21
orf19.278	1.11025	0.202299		Predicted ORF in Assemblies 19, 20 and 21
orf19.1693	1.11012	0.215315	CAS4	Protein of RAM cell wall integrity signaling network; role in cell separation, azole sensitivity; required for hyphal growth; insertion mutation near 3' end of gene causes increase in caspofungin sensitivity; pheromone/hyphal induced
orf19.7603	1.11	0.0961206		Predicted ORF in Assemblies 19, 20 and 21
orf19.6160	1.10994	0.338393		Predicted ORF in Assemblies 19, 20 and 21
orf19.334	1.10988	0.54587		Predicted ORF in Assemblies 19, 20 and 21
orf19.6387	1.10985	0.253913	HSP104	Functional homolog of S. cerevisiae Hsp104p; has chaperone and prion propagation activity in S. cerevisiae; guanidine-insensitive; heat shock/stress induced; downregulated in biofilm upon treatment with farnesol; no human or murine homolog
orf19.7519	1.10976	0.204466		Predicted ORF in Assemblies 19, 20 and 21
orf19.4842	1.10948	0.12339		Predicted ORF in Assemblies 19, 20 and 21
orf19.5892	1.10939	0.590344		Predicted ORF in Assemblies 19, 20 and 21
orf19.3250	1.10933	0.376798		Predicted ORF in Assemblies 19, 20 and 21
orf19.6580	1.1093	0.478246		Predicted ORF in Assemblies 19, 20 and 21; possibly spurious ORF (Annotation Working Group prediction)
orf19.6360	1.10915	0.237412		Predicted ORF in Assemblies 19, 20 and 21
orf19.4566	1.10885	0.472338		Protein similar to S. cerevisiae Rot1p, which has roles in cytoskeletal dynamics and cell wall biosynthesis; predicted Kex2p substrate
orf19.1877	1.1088	0.414185		Predicted ORF in Assemblies 19, 20 and 21
orf19.3930	1.10878	0.696079	YUH2	Predicted ORF in Assemblies 19, 20 and 21; described as similar to ubiquitin carboxyl-terminal hydrolases
orf19.4241	1.10862	0.588895		Predicted ORF in Assemblies 19, 20 and 21
orf19.6452	1.10833	0.0038433	RBP1	Peptidyl-prolyl cis-trans isomerase; rapamycin-binding protein; homozygous null mutation confers rapamycin resistance; regulated by Gcn4p; macrophage-induced protein; repressed in response to 3-AT; functional homolog of S. cerevisiae Rbp1p
orf19.3561	1.10831	0.183019	CDC7	Predicted ORF in Assemblies 19, 20 and 21; cell-cycle regulated periodic mRNA expression; S. cerevisiae ortholog is not cell-cycle regulated
orf19.3031	1.10824	0.31471		Predicted ORF in Assemblies 19, 20 and 21
orf19.1439	1.1082	0.0884248	IPK1	Predicted ORF in Assemblies 19, 20 and 21
orf19.4624	1.10811	0.401249	HRT2	Protein described as having a role in Ty3 transposition; decreased expression in hyphae compared to yeast-form cells; protein detected by mass spec in stationary phase cultures
orf19.7121	1.10809	0.0235969		Predicted ORF in Assemblies 19, 20 and 21; possibly spurious ORF (Annotation Working Group prediction)
orf19.3841	1.10809	0.121619		Predicted ORF in Assemblies 19, 20 and 21; described as similar to S. cerevisiae Apg1p; induced upon adherence to polystyrene
orf19.4164	1.10804	0.366295		Predicted ORF in Assemblies 19, 20 and 21
orf19.5604	1.10803	0.152134	MDR1	Multidrug efflux pump of plasma membrane; member of the MDR family of major facilitator transporter superfamily; methotrexate is preferred substrate; overexpression in drug-resistant clinical isolates confers fluconazole resistance
orf19.2481	1.10797	0.478563		Predicted ORF in Assemblies 19, 20 and 21; possibly spurious ORF (Annotation Working Group prediction)
orf19.4063	1.10764	0.10521	GPT1	GABA/polyamine transporter; 9 to 11 membrane spanning segments; complements GABA uptake defect of an S. cerevisiae uga4 put4 gap1 triple mutant; complements growth of an S. cerevisiae spe1 mutant under polyamine limitation
orf19.6525	1.10763	0.309271		Predicted ORF in Assemblies 19, 20 and 21; possibly spurious ORF (Annotation Working Group prediction); transcriptionally activated by Mnl1p under weak acid stress
orf19.4651	1.10762	0.0544787	PGA53	Putative GPI-anchored protein of unknown function; greater mRNA abundance observed in a cyr1 homozygous null mutant than in wild type
orf19.1052	1.10759	0.528501		Predicted histone H2B
orf19.1718	1.10759	0.293618		Predicted zinc-finger protein of unknown function; decreased transcription is observed upon fluphenazine treatment
orf19.1539	1.10736	0.201399		Predicted ORF in Assemblies 19, 20 and 21; highly induced upon biofilm formation
orf19.5862	1.1072	0.258645		Protein described as related to arginases; downregulated upon adherence to polystyrene; regulated by Gcn2p and Gcn4p
orf19.5338	1.10711	0.364195	GAL4	Putative transcription factor with zinc cluster DNA-binding motif; ortholog of S. cerevisiae Gal4p, but is not involved in the regulation of galactose utilization genes; caspofungin repressed
orf19.7574	1.10708	0.441021		Predicted ORF in Assemblies 19, 20 and 21
orf19.5244	1.10704	0.11326	MCD4	Protein of major facilitator superfamily; has phosphodiesterase/nucleotide pyrophosphatase domain; similar to S. cerevisiae Mcd4p, which acts in GPI anchor biosynthesis
orf19.3717	1.10689	0.205681		Predicted ORF from Assembly 19; removed from Assembly 20
orf19.3806	1.10681	0.38492		Predicted ORF in Assemblies 19, 20 and 21
orf19.3068	1.10681	0.0929593		Predicted ORF from Assembly 19; merged with orf19.5376 in Assembly 20
orf19.4412	1.10666	0.40083		Predicted ORF in Assemblies 19, 20 and 21
orf19.5032	1.10658	0.497608	SIM1	Protein involved in cell wall maintenance, redundant with Sun41p; described as a DNA replication regulator; produced under vaginal conditions; macrophage-downregulated gene; transcription is negatively regulated by Rim101p, Cyr1p, Ras1p
orf19.609	1.1063	0.241495		Predicted ORF in Assemblies 19, 20 and 21; transcription is specific to white cell type
orf19.6502	1.10624	0.151598		Predicted ORF in Assemblies 19, 20 and 21; upregulation correlates with clinical development of fluconazole resistance
orf19.4306	1.10615	0.0180833		Predicted ORF in Assemblies 19, 20 and 21
orf19.6989	1.106	0.0561021		Predicted ORF in Assemblies 19, 20 and 21
orf19.4972	1.10561	0.107484		Putative transcription factor with zinc finger DNA-binding motif
orf19.1776	1.10535	0.637205		Predicted ORF in Assemblies 19, 20 and 21
orf19.2132	1.10533	0.548805		Predicted ORF in Assemblies 19, 20 and 21; possibly spurious ORF (Annotation Working Group prediction)
orf19.4905	1.10532	0.234906		Predicted ORF in Assemblies 19, 20 and 21; decreased expression observed in an ssr1 homozygous null mutant
orf19.3301	1.10525	0.398692		Predicted ORF in Assemblies 19, 20 and 21; induced by heavy metal (cadmium) stress; Hog1p-induced; transcriptionally activated by Mnl1p under weak acid stress
orf19.3457	1.10492	0.163467	SWD3	Predicted ORF in Assemblies 19, 20 and 21
orf19.1109	1.10477	0.296649		Predicted ORF in Assemblies 19, 20 and 21
orf19.2168	1.10476	0.72563		Predicted ORF in Assemblies 19, 20 and 21
orf19.4529	1.10444	0.0673251		Protein not essential for viability
orf19.2112	1.10435	0.240607		Predicted ORF in Assemblies 19, 20 and 21
orf19.4376	1.10434	0.116514		Predicted ORF in Assemblies 19, 20 and 21
orf19.1158	1.10427	0.0583552		Predicted ORF in Assemblies 19, 20 and 21
orf19.4600	1.10407	0.72756		Predicted ORF in Assemblies 19, 20 and 21
orf19.6936	1.10391	0.444356	RAD53	Protein involved in regulation of DNA-damage-induced filamentous growth; putative component of cell cycle checkpoint; ortholog of S. cerevisiae Rad53p, protein kinase required for cell-cycle arrest in response to DNA damage
orf19.5772	1.10386	0.273952		Predicted ORF in Assemblies 19, 20 and 21
orf19.257	1.10376	0.524366		Transcription is negatively regulated by Sfu1p; repressed by nitric oxide
orf19.5629	1.10335	0.440658	QCR7	Protein described as ubiquinol-cytochrome-c reductase, subunit 7
orf19.4764	1.10332	0.475222		Predicted ORF in Assemblies 19, 20 and 21
orf19.1825	1.10325	0.271648		Protein not essential for viability; filament induced; regulated by Nrg1p, Rfg1p, Tup1p
orf19.4520	1.10324	0.150567		Predicted ORF in Assemblies 19, 20 and 21
orf19.1513	1.10319	0.0976644	FAB1	Phosphatidylinositol 3-phosphate 5-kinase; required for hyphal growth on solid media, and for wild-type vacuolar morphology and acidification; not required for wild-type virulence in mouse systemic infection or for adherence to HeLa cells
orf19.6328	1.10309	0.0544818		Predicted ORF in Assemblies 19, 20 and 21
orf19.6557	1.10307	0.245263		Predicted ORF in Assemblies 19, 20 and 21; transcriptionally activated by Mnl1p under weak acid stress
orf19.3608	1.10282	0.535139		Predicted ORF in Assemblies 19, 20 and 21
orf19.2781	1.1027	0.0554348		Predicted ORF in Assemblies 19, 20 and 21
orf19.3894	1.1027	0.100758		Predicted ORF in Assemblies 19, 20 and 21; mutation confers hypersensitivity to toxic ergosterol analog
orf19.6875	1.10258	0.426237	VPS35	Putative role in vacuolar sorting; downregulated in biofilm; induced upon adherence to polystyrene
orf19.871	1.10258	0.458753		Predicted ORF in Assemblies 19, 20 and 21
orf19.6585	1.10252	0.305623		Predicted ORF in Assemblies 19, 20 and 21
orf19.2847.1	1.10251	0.145879		Pseudogene; formerly an ORF Predicted by Annotation Working Group that was subsequently removed from Assembly 20
orf19.4849	1.102	0.0028537		Predicted ORF in Assemblies 19, 20 and 21
orf19.3623	1.10188	0.586824	SMC2	Protein similar to S. cerevisiae Smc2p, which is a component of the condensin complex involved in mitotic chromosome condensation; induced under hydroxyurea treatment
orf19.840	1.10187	0.528081	RPL21A	Putative ribosomal protein; genes encoding cytoplasmic ribosomal subunits, translation factors, and tRNA synthetases are downregulated upon phagocytosis by murine macrophage
orf19.4143	1.10177	0.179202		Predicted ORF in Assemblies 19, 20 and 21
orf19.3135	1.10172	0.562179		Predicted ORF in Assemblies 19, 20 and 21
orf19.2483	1.10164	0.434088	RIM1	Predicted ORF in Assemblies 19, 20 and 21; protein level decreased in stationary phase cultures
orf19.7397	1.10164	0.0379718		Predicted ORF in Assemblies 19, 20 and 21
orf19.4507	1.10149	0.357124		Predicted ORF in Assemblies 19, 20 and 21
orf19.2272	1.10147	0.463658		Predicted ORF in Assemblies 19, 20 and 21
orf19.3929	1.10131	0.166955		Predicted ORF in Assemblies 19, 20 and 21
orf19.5539	1.10109	0.173828		Predicted ORF in Assemblies 19, 20 and 21
orf19.1975	1.10097	0.482243		Predicted ORF in Assemblies 19, 20 and 21
orf19.3590	1.1009	0.381161	IPP1	Protein described as inorganic pyrophosphatase; antigenic in human, mouse; soluble protein in hyphae; macrophage-induced protein; protein detected by mass spec in exponential and stationary phase cultures
orf19.1010	1.10071	0.352375	MNT3	Protein with similarity to mannosyltransferases; transcription is elevated in cyr1, chk1, nik1, and sln1 homozygous null mutants; fungal-specific (no human or murine homolog)
orf19.3409	1.10066	0.485299	SEC12	Protein described as a guanyl-nucleotide exchange factor; transcriptionally regulated by iron; expression greater in high iron
orf19.7360	1.10061	0.626622		Predicted ORF in Assemblies 19, 20 and 21
orf19.3966	1.10053	0.33025	CRH12	Putative cell wall protein, member of the CRH family; transcription is regulated by Nrg1p and Tup1p; alkaline upregulated by Rim101p; repressed during cell wall regeneration
orf19.3506	1.09983	0.133504	DBR1	Debranchase; homozygous mutant accumulates lariat intermediates of mRNA splicing
orf19.2940	1.09976	0.34408		Predicted ORF in Assemblies 19, 20 and 21
orf19.6220	1.09963	0.510173		Predicted ORF in Assemblies 19, 20 and 21
orf19.2211	1.09962	0.242887		Predicted ORF in Assemblies 19, 20 and 21
orf19.113	1.09961	0.369698	CIP1	Protein with slight similarity to plant isoflavone reductase; transcription induced by cadmium (specifically, not by other heavy metals or heat shock), yeast-hyphal switch, oxidative stress (via Cap1p), or macrophage interaction
orf19.1735	1.09951	0.132993		Predicted ORF in Assemblies 19, 20 and 21
orf19.826	1.09948	0.0249253		Predicted ORF in Assemblies 19, 20 and 21
orf19.245	1.09944	0.00812172	DDC1	Transcription is induced during filamentous growth; regulated by Nrg1p, Tup1p
orf19.2051	1.09933	0.0442651		Predicted ORF in Assemblies 19, 20 and 21
orf19.4193.1	1.09922	0.362013	RPS13	Putative ribosomal protein; ORF predicted by Annotation Working Group
orf19.6610	1.09913	0.14455		Predicted ORF in Assemblies 19, 20 and 21
orf19.3478	1.09911	0.130764	NIP7	Protein described as a nucleolar protein with role in ribosomal assembly; hyphal induced
orf19.4443	1.09906	0.504678	YPD1	Phosphohistidine intermediate protein in a phosphorelay signal transduction pathway; residue His69 is the phosphoacceptor histidine; predicted to be soluble and cytosolic; functional homolog of S. cerevisiae Ypd1p
orf19.4851	1.09903	0.186242	TFA1	Protein with polyglutamate motifs and abundant Ser/Thr residues; described as a subunit of TFIIE, which is a basal transcription initiation factor of RNA Polymerase II
orf19.2901	1.09892	0.113376	NUP60	Protein not essential for viability; similar to S. cerevisiae Nup60p, which is a subunit of the nuclear pore complex
orf19.1050	1.0987	0.395814		Predicted ORF in Assemblies 19, 20 and 21; possibly spurious ORF (Annotation Working Group prediction)
orf19.3263	1.09836	0.331008		Predicted ORF in Assemblies 19, 20 and 21
orf19.7463	1.09826	0.147251		Predicted ORF in Assemblies 19, 20 and 21
orf19.6840	1.09825	0.225335		Predicted ORF in Assemblies 19, 20 and 21; transcription is induced in response to alpha pheromone in SpiderM medium
orf19.5003	1.09786	0.583416		Predicted ORF in Assemblies 19, 20 and 21
orf19.562	1.09766	0.257167	FGR13	Protein encoded in retrotransposon Zorro3 with a potential zinc finger; lacks an ortholog in S. cerevisiae; transposon mutation affects filamentous growth; possibly spurious ORF (Annotation Working Group prediction)
orf19.606	1.09761	0.313916		Predicted ORF in Assemblies 19, 20 and 21
orf19.2641	1.09747	0.446984	ARP1	Protein described as centractin; induced upon adherence to polystyrene
orf19.4724	1.09744	0.607067		Predicted ORF in Assemblies 19, 20 and 21
orf19.6025	1.09731	0.362412		Predicted ORF in Assemblies 19, 20 and 21
orf19.7247	1.09716	0.493655	RIM101	Transcription factor involved in alkaline pH response; required for alkaline-induced hyphal growth; role in virulence in mouse systemic infection; activated by C-terminal proteolytic cleavage; mediates both positive and negative regulation
orf19.4881	1.09715	0.153447		Predicted ORF from Assembly 19; merged with orf19.4880 in Assembly 20
orf19.6038	1.09714	0.144465		Predicted zinc-finger protein of unknown function; has similarity to S. cerevisiae Uga3p, which is a transcription factor involved in the regulation of gamma-aminobutyrate metabolism genes
orf19.3782.2	1.09712	0.262315		ORF Predicted by Annotation Working Group; intron in 5'-UTR
orf19.1091	1.09702	0.161133		Putative ortholog of S. cerevisiae Nop8p, which is a nucleolar protein required for 60S ribosomal subunit biogenesis
orf19.1140	1.09697	0.703524		Predicted ORF in Assemblies 19, 20 and 21; possibly spurious ORF (Annotation Working Group prediction)
orf19.5073	1.09688	0.200641	DPM1	Protein with similarity to S. cerevisiae Dpm1p, which is dolichol phosphate mannose synthase; filament induced; Tup1p-regulated
orf19.3208	1.09667	0.0209782	DAL52	Putative allantoate permease; fungal-specific (no human or murine homolog); not essential for viability; similar to S. cerevisiae Dal5p
orf19.2285	1.0965	0.35594		Increased transcription is observed upon benomyl treatment
orf19.3688	1.09619	0.0576586		Predicted ORF in Assemblies 19, 20 and 21
orf19.2728	1.09617	0.417254		Predicted ORF in Assemblies 19, 20 and 21
orf19.5855	1.09617	0.197478	MBP1	Predicted ORF in Assemblies 19, 20 and 21; non-periodic mRNA expression; predicted, conserved MBF binding sites upstream of G1/S-regulated genes
orf19.6592	1.09609	0.397455		Predicted membrane transporter, member of the aromatic acid:proton symporter (AAHS) family, major facilitator superfamily (MFS)
orf19.6141	1.09604	0.502949	HGT16	Putative glucose transporter of the major facilitator superfamily; the C. albicans glucose transporter family comprises 20 members; 12 probable membrane-spanning segments; gene has intron; expressed in rich medium with 2% glucose
orf19.1592	1.096	0.141748		Predicted ORF in Assemblies 19, 20 and 21
orf19.3870	1.09587	0.714348	ADE13	Enzyme of adenine biosynthesis; soluble protein in hyphae; not induced during GCN response, in contrast to the S. cerevisiae ortholog; repressed by nitric oxide
orf19.1124	1.09575	0.627014		Predicted ORF in Assemblies 19, 20 and 21
orf19.1621	1.09569	0.0143674	GPA2	G-protein alpha subunit; regulates filamentous growth; reports differ on a role in cAMP-mediated glucose signaling, cAMP-PKA pathway, MAP kinase cascade; Gpr1p C terminus binds Gpa2p; regulates HWP1 and ECE1
orf19.3297	1.09559	0.67139		Predicted ORF in Assemblies 19, 20 and 21
orf19.4257	1.09556	0.192439	INT1	Integrin-like protein; role in morphogenesis, adhesion, and mouse cecal colonization and systemic virulence; similar to S. cerevisiae Bud4p (has role in bud site selection); structurally similar to alpha-subunit of human leukocyte integrins
orf19.4475	1.09555	0.106597	KTR4	Protein with similarity to mannosyltransferases; induced during cell wall regeneration; fungal-specific (no human or murine homolog)
orf19.6062	1.09537	0.390584		Predicted ORF in Assemblies 19, 20 and 21
orf19.4016	1.09536	0.0861123		Predicted ORF in Assemblies 19, 20 and 21; amphotericin B induced; repressed by nitric oxide; protein level decreased in stationary phase cultures
orf19.6024	1.09526	0.25624		Predicted ORF in Assemblies 19, 20 and 21
orf19.2862	1.09516	0.0730453	RIB1	Putative GTP cyclohydrolase II; enzyme of riboflavin biosynthesis; fungal-specific (no human or murine homolog)
orf19.5243	1.0951	0.160695	TRP3	Predicted ORF in Assemblies 19, 20 and 21; regulated by Gcn2p and Gcn4p
orf19.5711	1.09498	0.309762		Predicted ORF in Assemblies 19, 20 and 21
orf19.4427	1.09479	0.0844091	SKP1	Protein described as subunit D of kinetochore protein complex CBF3; regulated by Gcn4p; repressed in response to amino acid starvation (3-aminotriazole treatment)
orf19.7027	1.09479	0.281157		Predicted ORF in Assemblies 19, 20 and 21; merged with orf19.7028 in Assembly 21
orf19.4767	1.09478	0.230808		Putative transcription factor with zinc cluster DNA-binding motif
orf19.4939	1.09477	0.395394		Predicted ORF in Assemblies 19, 20 and 21
orf19.3402	1.09451	0.645454	FPG1	Formamidopyrimidine DNA glycosylase, involved in repair of gamma-irradiated DNA
orf19.3998	1.09439	0.111849		Predicted ORF in Assemblies 19, 20 and 21
orf19.787	1.0942	0.388855		Predicted ORF in Assemblies 19, 20 and 21
orf19.2708	1.09417	0.15045		Predicted ORF in Assemblies 19, 20 and 21; nonessential
orf19.6742	1.09415	0.412878		Predicted ORF in Assemblies 19, 20 and 21
orf19.794	1.09413	0.171272		Predicted ORF in Assemblies 19, 20 and 21
orf19.6280	1.09397	0.470766		Predicted ORF in Assemblies 19, 20 and 21
orf19.3428	1.09395	0.151944		Predicted ORF in Assemblies 19, 20 and 21
orf19.6166	1.09381	0.16394		Predicted ORF in Assemblies 19, 20 and 21
orf19.5295	1.0938	0.169111		Predicted ORF in Assemblies 19, 20 and 21; transcription is induced in response to alpha pheromone in SpiderM medium
orf19.2093	1.09378	0.271113	RFA1	Protein described as DNA replication factor A; RNA abundance regulated by cell cycle, tyrosol and cell density
orf19.2810	1.09373	0.118495	AAP1	Putative amino acid permease; fungal-specific (no human or murine homolog)
orf19.5271	1.09369	0.218569		Predicted ORF in Assemblies 19, 20 and 21
orf19.1519	1.09351	0.460979		Predicted ORF in Assemblies 19, 20 and 21
orf19.1334	1.09342	0.427706		Predicted ORF in Assemblies 19, 20 and 21; possibly spurious ORF (Annotation Working Group prediction); transcription is repressed in response to alpha pheromone in SpiderM medium
orf19.729	1.09329	0.431467	SHE3	Protein similar to S. cerevisiae She3p; transposon mutation affects filamentous growth
orf19.3337	1.09313	0.101422		Predicted ORF in Assemblies 19, 20 and 21
orf19.3451	1.0927	0.533328		Predicted ORF from Assembly 19; merged with orf19.139 in Assembly 20
orf19.3007	1.0926	0.312436		Predicted ORF in Assemblies 19, 20 and 21
orf19.2873	1.09257	0.706212	TOP2	DNA topoisomerase II; catalyzes ATP-dependent DNA relaxation and decatenation in vitro; Y842 predicted to be catalytic; functional homolog of S. cerevisiae Top2p; sensitive to amsacrine or doxorubicin; farnesol-upregulated in biofilm
orf19.5579	1.09257	0.265703		Predicted ORF in Assemblies 19, 20 and 21
orf19.3640	1.0925	0.317751		Predicted ORF from Assembly 19; removed from Assembly 20
orf19.2905	1.09249	0.126003		Predicted ORF in Assemblies 19, 20 and 21
orf19.4205.1	1.09242	0.0131033		ORF Predicted by Annotation Working Group
orf19.6606	1.09219	0.119674		Predicted ORF in Assemblies 19, 20 and 21
orf19.1156	1.09216	0.123554	FUS1	Probable ortholog of S. cerevisiae Fus1p, which is a membrane protein required for mating; transcription is activated by Cph1p in mating type a cells, homozygous for the MTLa locus; alpha factor induced
orf19.2958	1.09203	0.14158		Predicted ORF in Assemblies 19, 20 and 21
orf19.6556	1.09202	0.258678		Predicted ORF in Assemblies 19, 20 and 21
orf19.1849	1.09195	0.472056		Predicted ORF in Assemblies 19, 20 and 21
orf19.1139	1.09192	0.697739		Predicted ORF in Assemblies 19, 20 and 21
orf19.1377	1.09168	0.131083	IPK2	Predicted ORF in Assemblies 19, 20 and 21; moderately induced at 42 deg
orf19.6340	1.09166	0.0176687		Predicted ORF in Assemblies 19, 20 and 21
orf19.1035	1.09158	0.432719	WAR1	Predicted zinc cluster protein involved in resistance to weak organic acids; has similarity to S. cerevisiae War1p, which is a transcription factor involved in the regulation of weak acid stress response genes
orf19.7007	1.09154	0.0240788		Predicted ORF in Assemblies 19, 20 and 21; possibly spurious ORF (Annotation Working Group prediction)
orf19.7369	1.09136	0.324721		Predicted ORF in Assemblies 19, 20 and 21
orf19.6356	1.09131	0.341512		Predicted ORF in Assemblies 19, 20 and 21
orf19.3168	1.09128	0.664844	RPN8	Predicted ORF in Assemblies 19, 20 and 21; mutation confers hypersensitivity to amphotericin B; transcription is regulated by Mig1p; regulated by Gcn2p and Gcn4p
orf19.1948	1.09108	0.205103		Predicted ORF in Assemblies 19, 20 and 21
orf19.4740	1.09089	0.451331		Predicted ORF in Assemblies 19, 20 and 21
orf19.653	1.09086	0.171061		Predicted ORF in Assemblies 19, 20 and 21
orf19.3369	1.09073	0.728158	MOH1	Protein similar to S. cerevisiae Moh1p; transcription is induced in response to alpha pheromone in SpiderM medium; transcriptionally activated by Mnl1p under weak acid stress
orf19.1950	1.09044	0.491214		Predicted ORF in Assemblies 19, 20 and 21
orf19.4080	1.09042	0.0161634		Predicted ORF in Assemblies 19, 20 and 21; possibly spurious ORF (Annotation Working Group prediction)
orf19.4100	1.09041	0.390082		Predicted ORF from Assembly 19; merged with orf19.564 in Assembly 20
orf19.2437	1.09037	0.551063	ARC35	Predicted ORF in Assemblies 19, 20 and 21; shows colony morphology-related gene regulation by Ssn6p; mutation confers hypersensitivity to cytochalasin D
orf19.1009	1.09023	0.00523891		Predicted ORF in Assemblies 19, 20 and 21
orf19.3905	1.09013	0.162599		Predicted ORF in Assemblies 19, 20 and 21
orf19.428	1.09013	0.307039		Predicted ORF in Assemblies 19, 20 and 21; induced during planktonic growth
orf19.2026	1.08997	0.44616		Predicted ORF in Assemblies 19, 20 and 21
orf19.26	1.08978	0.58332		Predicted ORF in Assemblies 19, 20 and 21; induced by nitric oxide in yhb1 mutant
orf19.6850	1.08974	0.159156		Putative transcription factor with C3HC4 zinc finger DNA-binding motif; not essential for viability
orf19.3062	1.0896	0.360964		Predicted ORF in Assemblies 19, 20 and 21
orf19.7083	1.08957	0.0532728	DCC1	Predicted ORF in Assemblies 19, 20 and 21; cell-cycle regulated periodic mRNA expression
orf19.5274	1.08937	0.154441		Predicted ORF in Assemblies 19, 20 and 21
orf19.4577	1.08936	0.167633		Predicted ORF in Assemblies 19, 20 and 21
orf19.7055	1.08928	0.230003		Predicted ORF in Assemblies 19, 20 and 21; possibly spurious ORF (Annotation Working Group prediction)
orf19.3131	1.08908	0.494363	OYE32	Protein of NAD(P)H oxidoreductase family; induced by nitric oxide, amphotericin B, oxidative stress (via Cap1p); increased transcription associated with MDR1 overexpression or benomyl treatment; macrophage-downregulated protein abundance
orf19.103	1.08886	0.0259704	KAR5	Protein of unknown function; induced by alpha factor
orf19.5929	1.08883	0.681758		Putative protein of unknown function, transcription is positively regulated by Tbf1p; predicted ORF in Assemblies 19, 20 and 21
orf19.3971	1.08872	0.21447		Predicted ORF in Assemblies 19, 20 and 21
orf19.5932	1.0887	0.593814		Predicted ORF in Assemblies 19, 20 and 21; fungal-specific (no human or murine homolog)
orf19.5549	1.08857	0.580626		Predicted ORF in Assemblies 19, 20 and 21
orf19.7520	1.08841	0.559153	POT1	Putative peroxisomal 3-oxoacyl CoA thiolase; transcription is regulated by Nrg1p and Mig1p; farnesol regulated
orf19.3764	1.08835	0.113383	GSG1	Protein not essential for viability; similar to S. cerevisiae Gsg1p, which is a subunit of the TRAPP complex involved in targeting of ER-to-Golgi transport vesicles
orf19.750	1.08822	0.00281225		Predicted ORF in Assemblies 19, 20 and 21; exogenously expressed protein is a substrate for Kex2p processing in vitro; possibly spurious ORF (Annotation Working Group prediction)
orf19.696	1.0882	0.0438053	STE2	Receptor for alpha factor mating pheromone, MFalpha; required for a-type cells to respond to alpha factor, for opaque a-form mating and white a-form response; possible Kex2p substrate; a-specific, alpha-factor induced, A1-Alpha2p repressed
orf19.580	1.08815	0.415412		Protein not essential for viability
orf19.7151	1.08795	0.334129		Predicted ORF in Assemblies 19, 20 and 21
orf19.2135	1.08794	0.322014	TSM1	Putative protein of unknown function, transcription is upregulated in clinical isolates from HIV+ patients with oral candidiasis; transcription is regulated by Nrg1p; predicted ORF in Assemblies 19, 20 and 21
orf19.3724	1.08782	0.266176		Predicted ORF in Assemblies 19, 20 and 21
orf19.6078	1.08773	0.467583	POL93	Predicted ORF in retrotransposon Tca8 with similarity to the Pol region of retrotransposons encoding reverse transcriptase, protease and integrase; downregulated in response to ciclopirox olamine; induced upon biofilm formation
orf19.808	1.08762	0.00234505		Predicted ORF in Assemblies 19, 20 and 21
orf19.2542	1.0875	0.0533621		Predicted ORF in Assemblies 19, 20 and 21
orf19.6183	1.08738	0.113514		Predicted ORF in Assemblies 19, 20 and 21
orf19.3887	1.08734	0.165705		Predicted ORF in Assemblies 19, 20 and 21
orf19.7448	1.08731	0.489535	LYS9	Putative enzyme of lysine biosynthesis; soluble protein in hyphae; amphotericin B repressed; Gcn4p-regulated; shows colony morphology-related gene regulation by Ssn6p
orf19.5904	1.08721	0.17236	RPL19A	Predicted ribosomal protein; genes encoding cytoplasmic ribosomal subunits, translation factors, and tRNA synthetases are downregulated upon phagocytosis by murine macrophage
orf19.6627	1.08703	0.0837019		Predicted ORF in Assemblies 19, 20 and 21; possibly transcriptionally regulated upon hyphal formation
orf19.4593.1	1.08694	0.597607		ORF Predicted by Annotation Working Group
orf19.72	1.08692	0.123454		Predicted ORF from Assembly 19; merged with orf19.4720 in Assembly 20
orf19.537	1.08684	0.469195		Predicted ORF in Assemblies 19, 20 and 21
orf19.5965	1.08669	0.0460527		Predicted ORF in Assemblies 19, 20 and 21
orf19.4602	1.08654	0.348743	MDH1-1	Predicted malate dehydrogenase; macrophage-induced protein
orf19.1980	1.08654	0.480196	GIT4	Putative glycerophosphoinositol permease; fungal-specific (no human or murine homolog)
orf19.4295	1.08653	0.174498		Predicted ORF in Assemblies 19, 20 and 21
orf19.1346	1.0864	0.131808		Cell wall protein; expression is repressed by Rim101p; merged with orf19.5124 in Assembly 20
orf19.2328	1.08636	0.461761		Predicted ORF in Assemblies 19, 20 and 21
orf19.3016	1.08635	0.2846		Predicted ORF in Assemblies 19, 20 and 21
orf19.6802	1.08633	0.074536		Predicted ORF in Assemblies 19, 20 and 21
orf19.4981	1.08624	0.356662		Predicted ORF in Assemblies 19, 20 and 21
orf19.6094	1.0861	0.572765		Predicted ORF in Assemblies 19, 20 and 21
orf19.2938	1.08602	0.561946		Protein not essential for viability
orf19.4931	1.086	0.541748		Putative tRNA-Cys synthetase; genes encoding ribosomal subunits, translation factors, and tRNA synthetases are downregulated upon phagocytosis by murine macrophage; transcription is induced in response to alpha pheromone in SpiderM medium
orf19.2366	1.08591	0.198668		Predicted ORF in Assemblies 19, 20 and 21
orf19.7038	1.08589	0.183458		Predicted ORF in Assemblies 19, 20 and 21
orf19.7489	1.08586	0.256601		Predicted ORF in Assemblies 19, 20 and 21
orf19.302	1.08568	0.209755		Predicted ORF in Assemblies 19, 20 and 21
orf19.4965	1.08562	0.565958		Predicted ORF in Assemblies 19, 20 and 21
orf19.1854	1.0856	0.496981	HHF22	Putative histone H4; regulated by Efg1p; flucytosine, fluconazole-induced; amphotericin B, caspofungin repressed; shows colony morphology-related gene regulation by Ssn6p
orf19.3140	1.08557	0.276285		Predicted ORF in Assemblies 19, 20 and 21
orf19.5890	1.08555	0.0267951		Predicted ORF in Assemblies 19, 20 and 21
orf19.5266	1.08537	0.635821		Predicted ORF in Assemblies 19, 20 and 21
orf19.2393	1.08503	0.440869		Putative transcription factor with zinc finger DNA-binding motif
orf19.2612	1.08498	0.595749		Putative transcription factor with zinc finger DNA-binding motif; decreased expression observed in an ssr1 homozygous null mutant
orf19.4577.3	1.08483	0.405677		ORF Predicted by Annotation Working Group
orf19.177	1.08436	0.303351		Predicted ORF in Assemblies 19, 20 and 21
orf19.3537	1.08411	0.319973		Predicted ORF in Assemblies 19, 20 and 21; regulated by Tsa1p, Tsa1Bp in minimal media at 37 deg
orf19.3706	1.08403	0.295446		Predicted ORF in Assemblies 19, 20 and 21
orf19.7425	1.0835	0.198321		Predicted ORF in Assemblies 19, 20 and 21
orf19.856	1.08325	0.266501	IFK2	Protein not essential for viability
orf19.6235	1.08323	0.185013		Predicted ORF in Assemblies 19, 20 and 21
orf19.4807	1.0832	0.496336		Predicted ORF in Assemblies 19, 20 and 21
orf19.505	1.08314	0.202672	SRV2	Adenylate cyclase-associated protein that regulates adenylate cyclase activity; required for wild-type germ tube formation and for virulence in mouse systemic infection; mutant defects in filamentous growth are rescued by cAMP or dbcAMP
orf19.3942	1.08306	0.108164		Predicted ORF in Assemblies 19, 20 and 21
orf19.5343	1.08299	0.0705367	ASH1	GATA-like transcription factor; localizes to nuclei of daughter cells and hyphal tip cells; required for wild-type virulence but not kidney colonization in a mouse model of systemic infection; required for wild-type filamentous growth
orf19.4861.1	1.08289	0.147884		ORF Predicted by Annotation Working Group
orf19.684	1.08271	0.105292		Putative transcription factor with zinc finger DNA-binding motif; heterozygous null mutant exhibits hypersensitivity to parnafungin and cordycepin in the C. albicans fitness test
orf19.43	1.08232	0.575157		Predicted ORF from Assembly 19; expression upregulated during planktonic growth; removed from Assembly 20
orf19.4416	1.08232	0.0557617	VPS13	Predicted ORF in Assemblies 19, 20 and 21; gene used for multilocus sequence typing
orf19.4383	1.08219	0.0537435		Predicted ORF in Assemblies 19, 20 and 21
orf19.6907	1.08204	0.365701		Predicted ORF in Assemblies 19, 20 and 21
orf19.692	1.08198	0.352173		Predicted ORF in Assemblies 19, 20 and 21
orf19.4680	1.08196	0.265093		Predicted ORF in Assemblies 19, 20 and 21; mutation confers hypersensitivity to toxic ergosterol analog
orf19.3260	1.08163	0.433936		Predicted ORF in Assemblies 19, 20 and 21
orf19.4196	1.08154	0.491848		Predicted ORF in Assemblies 19, 20 and 21
orf19.2000	1.08137	0.0887248		Predicted ORF in Assemblies 19, 20 and 21
orf19.6139	1.08134	0.523792	FRE7	Protein similar to ferric reductase Fre10p; transcription is downregulated in response to treatment with ciclopirox olamine or 17-beta-estradiol; transcriptionally induced by alkaline conditions or interaction with macrophage
orf19.465	1.08123	0.346402	IFF9	Transcriptionally regulated by iron; expression greater in low iron; similar to GPI-linked cell-wall proteins; similar to Hyr1p
orf19.5748	1.08117	0.0387196		Predicted ORF in Assemblies 19, 20 and 21
orf19.7568	1.08113	0.0812424		Predicted ORF in Assemblies 19, 20 and 21
orf19.199	1.0811	0.225814		Predicted ORF in Assemblies 19, 20 and 21; hyphal-induced expression; greater mRNA abundance observed in a cyr1 homozygous null mutant than in wild type
orf19.7495	1.08109	0.0888		Predicted ORF in Assemblies 19, 20 and 21; induced by nitric oxide
orf19.2607	1.08102	0.486279		Predicted ORF in Assemblies 19, 20 and 21
orf19.1303	1.08097	0.593347		Predicted ORF in Assemblies 19, 20 and 21
orf19.4895	1.08092	0.352895		Predicted ORF in Assemblies 19, 20 and 21; possibly spurious ORF (Annotation Working Group prediction)
orf19.5975	1.08091	0.0321777		Putative transcription factor with zinc finger DNA-binding motif; fluconazole-downregulated; expression regulated during planktonic growth; increased expression observed in an ssr1 homozygous null mutant
orf19.1774	1.0809	0.293026		Predicted ORF in Assemblies 19, 20 and 21; transcription is upregulated in an RHE model of oral candidiasis; virulence-group-correlated expression
orf19.5461	1.08073	0.3576		ORF Predicted by Annotation Working Group; possibly spurious ORF (Annotation Working Group prediction)
orf19.4326	1.08071	0.427805		Predicted ORF in Assemblies 19, 20 and 21
orf19.6079	1.08061	0.0985824		Predicted ORF in retrotransposon Tca8 with similarity to the Gag region encoding nucleocapsid-like protein; transcription is downregulated in response to treatment with ciclopirox olamine; filament induced; regulated by Rfg1p, Tup1p
orf19.2903	1.08046	0.0209491		Putative Argonaute protein involved in RNA silencing, member of the Argonaute family; predicted ORF in Assemblies 19, 20 and 21; hyphal-induced expression, regulated by Cyr1p, Ras1p, Efg1p, Nrg1p, Tup1p
orf19.3418	1.08009	0.49304		Predicted ORF in Assemblies 19, 20 and 21
orf19.195	1.08008	0.446698		Predicted ORF from Assembly 19; possibly spurious ORF (Annotation Working Group prediction); merged with orf19.156 in Assembly 20
orf19.4375.1	1.08006	0.205429	RPS30	ORF Predicted by Annotation Working Group; putative 40S ribosomal protein S30; shows colony morphology-related gene regulation by Ssn6p
orf19.952	1.07997	0.103654		Predicted ORF in Assemblies 19, 20 and 21
orf19.36	1.07975	0.304862		Predicted ORF in Assemblies 19, 20 and 21; clade-associated gene expression
orf19.3233	1.07974	0.470067		Predicted ORF in Assemblies 19, 20 and 21
orf19.5775.3	1.07973	0.46545		ORF Predicted by Annotation Working Group; removed from Assembly 21
orf19.3735	1.0797	0.117163		Predicted ORF in Assemblies 19, 20 and 21; transcription is induced in response to alpha pheromone in SpiderM medium
orf19.3087	1.07955	0.53741	UBI3	Fusion of ubiquitin with the S34 protein of the small ribosomal subunit; mRNA decreases upon heat shock, appears to be degraded; functional homolog of S. cerevisiae RPS31
orf19.6109	1.07942	0.237292	TUP1	Transcriptional corepressor; represses filamentous growth, regulates phase switching, roles in germ tube induction, farnesol response; has C-terminal WD40 repeats; farnesol upregulated in biofilm; in repression pathways with Nrg1p, Rfg1p
orf19.3648	1.07934	0.173868		Predicted ORF in Assemblies 19, 20 and 21
orf19.7451	1.07932	0.193089	FUN31	Putative PAS kinase involved in cell wall damage response; similar to S. cerevisiae Psk1p, which is a putative serine/threonine protein kinase; transcriptionally activated by Mnl1p under weak acid stress
orf19.123	1.07916	0.133367		Predicted ORF in Assemblies 19, 20 and 21; possibly spurious ORF (Annotation Working Group prediction)
orf19.1136	1.07912	0.531176		Predicted ORF in Assemblies 19, 20 and 21
orf19.751	1.07912	0.347443		Predicted ORF in Assemblies 19, 20 and 21
[truncated: 4,374 more rows]
